# Supplementary material for: Short and long-term stratospheric impact of smoke from the 2019/2020 Australian wildfires
Source: Copernicus journal article supplement (doi:10.5194/egusphere-2023-273), 2023-02-21
Supplement: Supplementary file [file egusphere-2023-273-AC2-supplement.pdf]

# Short and long-term stratospheric impact of smoke from the 2019/2020 Australian wildfires

Johan Friberg<sup>1</sup>, Bengt G. Martinsson<sup>1</sup>, and Moa K. Sporre<sup>1</sup>

<sup>1</sup>Department of Physics, Lund University, Lund, 22100, Sweden

5 Correspondence to: johan.friberg@nuclear.lu.se

**Abstract.** In the end of December 2019 and beginning of 2020, massive firestorms in Australia formed pyrocumulonimbus clouds (PyroCb) that acted like enormous smokestacks, pumping smoke to the upper troposphere and stratosphere. We study the smoke with data from four satellite-based sensors: the aerosol observation platforms CALIOP, OMPS-LP, and OMPS-NM, and water vapor retrievals from MLS. Smoke was ~~lifted-lofted~~ to the upper troposphere and stratosphere during two events and spread almost exclusively within the extratropics. Smoke from the 1st event, starting Dec 29, was injected directly into the stratosphere by ~~pyrocumulonimbus clouds~~ PyroCbs causing a rapid initial increase in AOD. CALIOP identifies a rapid decline in this stratospheric smoke (half-life: 10 days), not captured in previous studies of the Australian fires, indicating photochemical processing of organic aerosol. This decay rate is in line with model predictions of mid-tropospheric organic aerosol loss by photolytic removal and is in agreement with similar to our estimates of decay rates after the North American fires in Aug 2017. PyroCbs Smoke from the 2nd event, Jan 4, injected small amounts of smoke directly into the stratosphere. Large amounts of smoke was injected to the upper troposphere, from where it ascended into ~~appeared in~~ the stratosphere after more than one week of transport in the troposphere during several weeks, forming a second peak in the aerosol load. Hence, we find that PyroCbs can impact the stratospheric aerosol load both via direct injection to the stratosphere, and through injection of smoke to the upper troposphere from where the smoke ascends into the stratosphere. The stratospheric AOD from the 2nd event fires decreased more slowly than the AOD from the 1st event, likely due to a combination of photolytic loss starting already in the troposphere and continued supply of smoke from the upper troposphere offsetting the loss rate ~~chemical processing of this smoke in the humid troposphere during its slower transport to the stratosphere~~. Together these injections gave a major elevation of the aerosol load during almost one year.

## 1 Introduction

25 The stratospheric aerosol scatters and absorbs solar radiation cooling the Earth's surface. Submicron particles can remain suspended for months or years in the stratosphere owing to their low settling rates, ~~and~~ lack of precipitation in the stratosphere, and the stratospheric transport patterns (Kremser et al., 2016). They follow the air stream and are removed from the stratosphere mainly in the ~~extratropics~~ midlatitudes and Polar Regions.

30 The Brewer-Dobson circulation moves air from the tropics to extratropics, where it descends into the lowermost stratosphere  
(LMS) and eventually to the upper troposphere. Residence times are years in its deep branch, and months in its shallow branch  
and LMS. These three layers hold 1/3 each of the global stratospheric aerosol load in periods of stratospheric background  
conditions (Andersson et al., 2015; Friberg et al., 2018). Variability in the stratospheric aerosol load is driven mainly by  
volcanic injections of particle forming SO<sub>2</sub> (Kremser et al., 2016; Solomon et al., 2011), but wildfires have been shown to  
35 contribute substantially in recent years (Peterson et al., 2021).

Wildfires can form so-called pyrocumulonimbus clouds (PyroCbs) that act as giant smokestacks injecting smoke to high  
altitudes. This phenomenon was revealed already more than 20 years ago, as some stratospheric aerosol layers could not be  
connected to volcanism (M. Fromm et al., 2000; M. D. Fromm & Servranckx, 2003). There have been many observations of  
40 stratospheric wildfire smoke since then, but its impact on the stratospheric aerosol load and climate impact has been considered  
negligible-low compared to the volcanic (Kremser et al., 2016; Thomason et al., 2018; Vernier et al., 2011). However, recently  
two massive events have turned the attention to wildfire smoke.

Massive fires in western North America in August 2017 formed PyroCb that had a remarkable impact on the stratospheric  
45 aerosol load and were the largest occasion in the satellite records (S. M. Khaykin et al., 2018; Peterson et al., 2018). Dense  
smoke layers rose to more than 23 km altitude due to radiation heating of the black carbon (BC) rich aerosol (Yu et al., 2019).  
The smoke properties were investigated (Das et al., 2021; Haarig et al., 2018; Martinsson et al., 2022) and its impact on the  
stratospheric aerosol load just after the fires was estimated to be similar to recent volcanic eruptions<sup>2</sup> (Peterson et al., 2018).

50 A similar event was observed during the gigantic fires in Eastern Australia in 2019/2020 (Kablick et al., 2020; S. Khaykin et  
al., 2020). The Austral spring and summer of 2019/2020 were exceptionally hot and dry, and the fire season started earlier  
than normally. It was unprecedented both in number of fires and size, and more than 20% of the Australian temperate forest  
was lost (Abram et al., 2021; Boer et al., 2020). Smoke spread over most of Eastern Australia. At least 38 PyroCbs injected  
55 smoke to the stratosphere during two events, Dec 29-31 and Jan 4 (Peterson et al., 2021). Light absorption of the BC-containing  
aerosol resulted in three vortex-like structures in the stratosphere (Kablick et al., 2020; S. Khaykin et al., 2020; Lestrelin et al.,  
2021; Peterson et al., 2021). Smoke layers were seen deep into the stratosphere in the beginning of January, and one of them  
rose to more than 35 km altitude by radiation heating (Khaykin et al., 2020).

60 Most smoke encounters in the stratosphere have been explained through upward transport by pyrocumulonimbus clouds, but  
studies in recent years indicate-suggest that further transport mechanisms cause cross-tropopause transport of smoke. The  
North American wildfires in Aug 2017 showed that self-lofting by radiative heating of the dense smoke layers caused smoke  
to rise from the tropopauseUT into the LMS (e.g. Khaykin et al., 2018; Peterson et al., 2018). Ohneiser et al. (2021) suggested  
self-lofting of smoke from the mid-troposphere as cause of extensive smoke-aerosol layers in the Arctic stratosphere during-in

**Kommentarad [JF1]:** This paragraph was moved from the  
Discussions section (section 3.8 Smoke transport to the stratosphere)

65 the end of 2019 and beginning of 2020. Whether those aerosol layers consisted of sulfate or sulfate-covered smoke particles is under debate (Boone et al., 2022; Knepp et al., 2022). Most recently, (Ohneiser et al., 2023) computed heating and lofting rates for light-absorbing smoke layers throughout the troposphere and the lower stratosphere. Their studies indicate that smoke layers can rise from the UT to the stratosphere via radiation heating. Also, convection downwind fires and isentropic cross-tropopause transport have been suggested as causes of the large stratospheric smoke amount after the Australian fires covered in our work (Hirsch & Koren, 2021; Magaritz-Ronen & Raveh-Rubin, 2021).

70 ~~Most r~~Recent findings show that 80-90% of the stratospheric smoke AOD after the 2017 North American fires was lost in the first few months after injection indicating photochemical processing of organics in the smoke (Martinsson et al., 2022), whereas the remaining aerosol stayed in the stratosphere for a year (Martinsson et al., 2022) or more (Ohneiser et al., 2022). We present, for the first time, evidence that this phenomenon occurred also in the Australian wildfire smoke layers.  
75 Furthermore, we find that part of the smoke lingered in the ~~mid and upper~~ troposphere for more than one week while gradually before entering the stratosphere.

## 2 Methods

### 2.1 Aerosol data

80 The smoke was observed using lidar data from the NASA satellite borne CALIOP instrument. We used the latest version of the rawest product available (V4-10, Level 1B). Backscattering coefficients were computed by correcting for light attenuation by air molecules (including ozone absorption), and for particles in the stratosphere. The molecular part was estimated using modelling data of the ozone and air densities provided in the CALIOP files compiled by NASA Langley Research Center (Friberg et al., 2018). The wildfire smoke is optically dense and strongly attenuated the lidar signals. The particle light attenuation was computed from the lidar signals themselves in an iterative approach explained in Martinsson et al. (2022). This  
85 procedure retrieves also the extinction-to-backscattering ratio, the so-called lidar ratio, used to compute aerosol extinction coefficients from the CALIOP lidar backscattering data. CALIOP has a polarization filter, separating backscattered light into parallel and perpendicular polarization. The ratio of the two forms the volume depolarization ratios used for ice cloud screening of the entire dataset. The volume depolarization ratio describes the properties of the complete volume of air, i.e. the aerosol particles together with the air. To study the temporal evolution of the smoke particles we therefore compiled also the particle  
90 depolarization ratios for individual smoke layers (Martinsson et al., 2022), which describes the properties of the particles themselves.

Ice clouds were removed in the lowest 3 kilo-meters of the stratosphere. CALIOP data were averaged to 8 km horizontal resolution, and volume depolarization ratios above 0.20 were classified as clouds. The process is described in more detail in  
95 Martinsson et al. (2022).

Further aerosol data was compiled from the limb-scatter observing instrument OMPS-LP (Ozone Mapping and Profiler Suite Limb Profiler). We used level 2.0 version 5-10 light extinction data (Suomi-NPP OMPS LP L2 AER Daily Product, version 2.0 (Taha et al., 2021)) of two wavelengths (745 and 997 nm). The OMPS-LP wavelength (510 nm), most similar to the CALIOP wavelength (532 nm), and used in [Martinsson et al. \(2022\)](#) (~~Martinsson et al., 2022~~), is unfortunately not reliable in the [Southern Hemisphere SH](#) (Taha et al., 2021). Data was filtered to minimize influence of ice-clouds and polar stratospheric clouds, and flags were used to prevent influence from erroneous data. A detailed description on this approach can be found in [Martinsson et al. \(2022\)](#).

Stratospheric AODs were computed by integration of the aerosol extinction coefficients from the tropopause to 35 km altitude, as well as in selected layers of the stratosphere. Tropopause heights from the MERRA-2 reanalysis were retrieved from the CALIOP and OMPS-LP files provided by NASA.

The UV aerosol index (UVAI) Level 3 data (V2.1) from OMPS-NM were used to track horizontal smoke transport. The data product is compiled from observations at 379 and 340 nm (Torres, 2019). It indicates presence of UV-absorbing aerosol particles and increases with altitude, making it well suited for tracking BC containing wildfire smoke in the UT and stratosphere. Data were screened based on NASA recommendations on data usage ([https://ozoneaq.gsfc.nasa.gov/docs/NMTO3-L3\\_Product\\_Descriptions.pdf](https://ozoneaq.gsfc.nasa.gov/docs/NMTO3-L3_Product_Descriptions.pdf)). Horizontal UVAI distributions were combined with vertical information from CALIOP to identify smoke transport to the upper troposphere and stratosphere from different fire events.

## 2.2 Identifying smoke from different events

~~Smoke from the different fire events was identified based on Using~~ daily maps over the UVAI, ~~and information on~~ stratospheric wind directions, ~~and altitude distributions from CALIOP curtains.~~ We tracked the motion day to day of the central parts of the fire events ([S1](#))-(Fig. 1), ~~and used the information to classify the individual smoke layers described above.~~ OMPS-NM shows two separate major events of elevated ultra-violet (UV) aerosol index from the 2019 – 2020 Australian wildfires, first observed on Dec 29 and Jan 4 ~~as described in Peterson et al. (2021)~~(Fig. 1). Some days the two events overlapped horizontally. In such case additional information on altitude from CALIOP was used, because the smoke from the two main events on any given day differed markedly in altitude ([Supplementary](#)). We will elaborate more on this in the Results section.

~~The depolarization ratios for smoke from the 2<sup>nd</sup> fire were clearly lower than those for smoke from the 1<sup>st</sup> fire, as seen in Figures 1 and 2, as well as in the supplementary (Fig S2-43. This difference remains for more than one month, i.e., smoke layers from the 2<sup>nd</sup> fire continues to have lower depolarization ratios. This particle optical property verifies that we have classified the smoke successfully.~~

130 CALIOP provides vertical distributions of aerosol and clouds. Besides the attenuated backscattering provided as curtain plots, information on particle morphology (depolarization ratio, where zero corresponds to spherical particles) and particle size (color ratio, i.e. ratio in attenuated backscattering of wavelength 1064 nm to 532 nm). Figures 12 and 23 shows these three CALIOP features from the first satellite passes over the regions with elevated UVAI from the first days after the 1st and 2nd fire event, respectively. Non-cloud features can be identified by strong backscattering signal in connection with depolarization ratios less than approximately 0.2 and color ratios well below 1. For an example see the observation on 2020-01-03 at 10:07 UTC (Figure-1n-p2), where a thin smoke layer in the tropopause region resides over deep cloud layers. In optically thick smoke layers, there is a shift in color ratio from a low value at the top to significantly higher values lower down in the smoke layer. These elevated values deep into the layers are artefacts caused by stronger attenuation for the shorter wavelength. The signal from the layers closest to the satellite (at the layer top) is not-less affected by attenuation, whereas deeper into the layer the shortwave signal  
140 (532 nm) becomes attenuated more than the longwave one (1064 nm) (Martinsson et al., 2022).

### 2.3 Water vapor observations

Satellite observations of water vapor from the Microwave limb-sounder (MLS) aboard the Aura satellite was used together with aerosol data. We use the level 2 night-time data version 5.0-1.0a data of individual smoke layers. Data is provided at 12  
145 levels per decade change of pressure for 1000 – 1 hPa. Low altitude data were excluded to reduce impact of the strong gradient in H<sub>2</sub>O mixing ratio across the tropopause. The highest peak pressure was 73 hPa (average 38 hPa), which is lower than reported in our recent study Martinsson et al. (2022) due to the higher tropopause altitude caused by the lower latitudes in the present study.

150 MLS data were used in comparison with CALIOP data. A shift down of CALIPSO orbit in September 2018 to the CloudSat level, caused variable horizontal distance between CALIOP aerosol and MLS H<sub>2</sub>O observations. Measurements with horizontal distances less than 330 km (average 180 km) were used, which lead to periodical loss of data. The data were screened using recommendations by the MLS team (Livesey et al., 2022).

## 3 Results and Discussions

### 155 3.1 Smoke distribution in the stratosphere

The CALIOP satellite instrument observed a dense smoke layer at 11-16 km altitude located around the tropopause over the Tasman Sea (Figure. 1a-d2, at 19-12-31 14:44 UTC), causing clear elevation of the aerosol load in the LMS and shallow BD branch already at New Year's Eve (Figure: 45). Large amounts of smoke were observed in the following days. Strong smoke

signals were seen spread within the southern midlatitudes stratosphere in the beginning of January (Figure- 34c, and Figure- 45b-d) and continued to be strong during the rest of the month.

The aerosol load was low in the southern extratropical stratosphere before the smoke injection by the Australian fires (Figure- 34a). Volcanic perturbations were present at 20 km altitude in the tropics and in the northern extratropics. These stem from eruptions in June and August 2019 by the volcanic eruptions of Ulawun and Raikoke (Kloss et al., 2020), which had low impact on the southern extratropics. In fact, the stratospheric aerosol load was lower in the southern extratropics than anywhere else.

The smoke spread latitudinally, almost exclusively to the south (Figure- 34). Figure 45 illustrates the AOD in three stratospheric layers. Most of the smoke stayed below the 470 K isentrope (the two lowest layers, Figure- 45b-c), but a minor part of the smoke rose by radiation heating, to the layer with the deep BD branch (Figure- 45a) where it continued to rise. A clear AOD elevation was evident in the Southern mid and high latitudes persisting throughout 2020.

### 3.2 Wildfire smoke compared to volcanism

We find that the injected wildfire smoke elevated the stratospheric aerosol load by volcanic proportions (Figure- 56a). The fires induced more than three times higher AOD elevation in its first year than the North American fires in 2017 did, and slightly higher than the Calbuco eruption in 2015 (Table 1). That eruption gave the largest volcanic impact on the Southern Hemisphere since the Mount Pinatubo eruption in 1991 (Friberg et al., 2018; Martinsson et al., 2022; Rieger et al., 2015; Thomason et al., 2018). The impact of the Australian fires was only matched in size by the large eruptions of Sarychev (2009) and Raikoke (2019), which both occurred in the Northern Hemisphere (Table 1).

Stratospheric background aerosol consists mainly of sulfurous and carbonaceous compounds (Martinsson et al., 2019). Volcanic aerosol contains large amounts of sulfurous, carbonaceous and crustal components (Andersson et al., 2013; Friberg et al., 2014; Martinsson et al., 2009), whereas smoke mainly consists of organic compounds and BC (Garofalo et al., 2019). The smoke had a rather different impact on the stratospheric aerosol load than the volcanic particles from the Calbuco eruption had (Figure 65a). The rise in AOD during several months after the volcanic injection stems from prolonged particle formation from volcanic SO<sub>2</sub> and particle growth. Conversely, wildfire smoke particles are mixtures of primary BC particles, and organics that form within hours or days, explaining the initial rapid rise in the AOD after the fires. In the CALIOP data, a second peak in AOD arose a few weeks after the first. We will elaborate more on this unexpected feature in the following sections.

The AOD evolution showed similar patterns in the two lower layers (Figure: 56b). The first peak in AOD is seen early both in the mid- and lowest layer similar to our observations of smoke from the North American fires (Martinsson et al., 2022). The upper layer shows a slow rise in AOD, due to the time required for smoke to rise from the mid layer. This rise was also observed by the limb-scattering instrument OMPS-LP (S. Khaykin et al., 2020) . However, that AOD elevation constitutes only a small portion of the total stratospheric AOD from the fires (Figure: 56b).

The rapid rise in AOD after the fires is not seen in the OMPS-LP data (Figure: 67). CALIOP data reveal that the smoke had twice the peak elevation over the background in AOD as the eruption of Calbuco did. Studies based on OMPS-LP data (S. Khaykin et al., 2020) report almost indistinguishable peak impact on the AOD from these two events. The OMPS-LP AODs after the fires increased much more slowly than for CALIOP and did not capture the first peak in the AOD in Figure 56a. This discrepancy is explained by differences in observation systems. OMPS-LP suffers from event termination already at low light extinction, which inhibits quantification of dense aerosol layers such as fresh wildfire smoke (M. Fromm et al., 2014; Lurton et al., 2018; Martinsson et al., 2022). The line-of-sight is orders of magnitude longer for the limb-viewer OMPS-LP than for the nadir-viewer CALIOP, adding-to-causing the difficulty of observing dense aerosol layers (Martinsson et al., 2022). Hence, CALIOP suffers less from light attenuation and the data can be corrected for light attenuation from the smoke particles, enabling us to compute the AOD of also the densest smoke layers (Martinsson et al., 2022). After 1 – 2 months the limb viewer problem with event termination is reduced, making a comparison of the different instruments feasible. The evolution in stratospheric AOD for the two instruments are compared in Figure 67 illustrating the slower rise for OMPS-LP. As pointed out in the Methods section, the OMPS-LP wavelength closest to CALIOP is not useful in the southern hemisphere (Taha et al., 2021). The light at longer wavelengths (OMPS-LP) are scattered less than the shorter (CALIOP), resulting in lower AODs for OMPS-LP. Similarly slow rise in the AOD from OMPS-LP was shown for smoke from the 2017 North American fires (Martinsson et al., 2022). Our present study shows another example of when space borne lidar is required for quantification of the stratospheric AOD when dense aerosol layers are present.

### 3.3 Stratospheric smoke from two events

We find that smoke was transported to the stratosphere from two fire events, by tracking smoke back to fires in Eastern Australia, combining CALIOP with OMPS-NM (Fig-1S1). The 1st event PyroCbs started on December 29 (Peterson et al., 2021), and the first CALIOP observations were two days later, on New Year's Eve. Those injections positioned smoke directly around the tropopause, i.e., partly in the stratosphere (Figure: 1a-d2, at 19-12-31-14:44 UTC). One large dense smoke layer was transported east from the fire region and was stuck for weeks over the Southeastern Pacific (Figure: 78a and Fig-1S1), where it formed a vortex isolating it from mixing with surrounding air (Kablick et al., 2020; S. Khaykin et al., 2020). The isolation made it easier to track this smoke. We find that the large dense smoke layer rose by a mean velocity of 260 m/day during the first 50 days after the PyroCb injections (Figure: 78b), similar to previously reported figures (S. Khaykin et al., 2020).

225 We also identified several other smoke layers from the 1st event located at lower stratospheric altitude and not connected to  
the large dense smoke layer (Figure: S1). Horizontally, these were transported more rapidly and could not be tracked during  
as many days due to mixing with the surrounding air, ~~and they were mostly located at lower altitudes compared to the dense  
isolated layer.~~

230 The 2nd fire event occurred on January the 4th, but smoke from this event showed only little immediate stratospheric influence  
(Figure: 23, S8-S13). Also Peterson et al. (2021) ~~reported much larger stratospheric impact from the 1<sup>st</sup> fire, based on studies  
of the fires' immediate impact in line with observations by Peterson et al. (2021).~~ 10 days after the PyroCb formations we start  
to see more stratospheric influence (Figure: 78). CALIOP images reveal addition of large dense smoke layers to the upper  
troposphere after Jan 4 (Figure 23). ~~We studied the temporal evolution of these smoke layer's position relative to the tropopause  
(Figure 11). The smoke layers are clearly located below the tropopause in the first days after the 2<sup>nd</sup> fire with minor over-  
shooting parts (e.g. Figure 2f and 2j). Over time, more and more smoke layers enter the stratosphere. Hence, the smoke was  
likely transported gradually across the tropopause in the weeks following the fire injections to the upper troposphere,  
beginning to enter the stratosphere around Jan 13-14.~~ We kept following this smoke in the stratosphere for 20 days.  
Interestingly, it rose ~~by~~ at approximately the same rate as the large, isolated smoke layer from the 1st event, 250 m/day (Figure:  
240 78b).

### 3.4 Transformation of smoke

By studying individual smoke layers, we find evidence of morphological transformation of the smoke particles during the first  
month after PyroCb injections. The CALIOP instrument is depolarization sensitive. Non-spherical particles depolarize the  
scattered light increasing the depolarized signal retrieved by the sensor. We find a steady increase in the particle depolarization  
245 ratio in stratospheric smoke from both the 1st and 2nd event ~~in the weeks following the PyroCb injections~~ (Figure: 78c). The  
trend lasts more than 30 days in the isolated layer from the 1st event after which the particle depolarization ratio becomes  
stable at a value of 0.15. A similar trend was observed in the weeks following the August 2017 fires in western North America  
(Martinsson et al., 2022), ~~whereas the opposite trend was observed when comparing fresh smoke with aged smoke well mixed  
with the background aerosol~~ (Baars et al., 2019). The depolarization ratio of the aerosol from the 2nd event deviates clearly  
250 from that of the 1st event by being much lower. We will discuss this difference further in a section below.

### 3.5 Separating data from the two events

To study the individual stratospheric impact of the two events, we need to separate data into two groups. (Peterson et al., 2021)  
reported that PyroCbs reached the stratosphere mainly during the 1st event fires, ~~and to a lesser extent from the 2<sup>nd</sup> event.~~  
Figure 12 shows that smoke from the 1st event reached the stratosphere shortly after the fires ~~(Fig. 2)~~, whereas large amounts  
255 of smoke from the 2nd event reached the upper troposphere (Figure: 23). Hence, most of the immediate stratospheric impact



stem from the 1st event. Some of the smoke from the 1st event reached the UT (Figure 12) and may have risen later along with smoke from the 2nd event contributing somewhat to the second AOD peak.

Smoke from the 1st event rose markedly in the stratosphere before smoke from the 2nd event entered the stratosphere (Figure 78b). Also their depolarization ratios differed markedly (Figure 78c). Clear differences between the 1st and 2nd injection events are evident in the time-altitude distributions (Figure 89) of the extinction coefficients, scattering ratios, and depolarization ratios, remaining over the course of more than two months. These parameters all show rising smoke in the weeks after the 1st event with particle depolarization ratios that increases over time (Figure 89c). In mid-January, smoke with lower depolarization ratios started to ascend in the stratosphere (Figure 78c), connecting the smoke below the minimum in Figure 89c to the 2nd event that ascended later into the stratosphere. The minima in Figure 89, occurring in between the smoke occurrences from the two injection events illustrates the impact from a rapid stratospheric injection from mainly the 1st fire event, and slow transport of smoke to the stratosphere from the 2nd event. We use this minimum to separate smoke data from the two fires (dashed lines in Figure 89) to form the AOD of the two events and investigate their individual impact on the stratospheric AOD.

### 270 3.6 Evolution of the smoke

The smoke AOD from the 1st event decreased rapidly over the first weeks, followed by slow decrease until spring (Figure 94a). Similarly rapid decline in smoke AOD and increasing particle depolarization ratio was seen for stratospheric smoke in our earlier study on the western North American wildfires in August 2017 (Martinsson et al., 2022). ~~We have considered transport out of the stratosphere, sedimentation, cloud formation, and hygroscopic growth/shrinkage as explanations of the decline and found that loss of material from the particles by photolysis is the plausible explanation for the decline~~ (Martinsson et al., 2022). ~~The long residence time due to the practically absent wet deposition in the stratosphere makes the effects of photolysis simpler to study compared with the troposphere. The importance of photolysis as a removal mechanism of organic aerosol is also supported by studies of photolysis in numerous laboratory experiments~~ (Molina et al., 2004; Sareen et al., 2013) ~~and by modeling~~ (Hodzic et al., 2015; Zawadowicz et al., 2020). ~~and were interpreted as depletion of organics in the smoke. The AOD decrease and co-occurring morphological changes for the 1st event Australian fires indicate depletion of aerosol also in this case.~~

~~Wildfire smoke is a mixture of BC and organics. Modelling and laboratory experiments indicate that organic matter in particles is depleted by photolytic loss within days in the mid-troposphere.~~ The trend of decreasing stratospheric AOD after the 1st fire event together with increasing particle depolarization ratio over time suggests that photolytic loss depletes organic aerosol in the smoke. Thus, the BC fraction in the smoke will increase over time, and may eventually constitute ~~the majority most~~ of the smoke particles mass. We therefore interpret the morphological transformation (depolarization ratio) and AOD decrease after the 1st event as decay of organic aerosol in the stratosphere.

290 ~~The smoke AOD from the 2nd event decreased much more slowly than AOD from the 1st. Furthermore, t~~The particle depolarization ratio is much lower for smoke from the 2nd event than from the 1<sup>st</sup> (Figure: 12, 23, 78c, and 89c). This difference may ~~lie be found~~ in the history of these smoke layers. Depolarization ratios for tropospheric smoke is lower than stratospheric (Haarig et al., 2018). The low depolarization ratios for smoke from the 2nd event indicate (chemical) processing of the smoke in the troposphere. Presence of water in the smoke particles can cause a collapse of the BC agglomerates to more spherical shape (Zhang et al., 2008)(Fan et al., 2016), which should result in lowering of the depolarization ratios. This explains the low depolarization ratios for smoke from the 2nd event fires, where smoke particles were exposed to the ~~more~~ humid tropospheric conditions for 10 days or more before entering the stratosphere. Different aging processes in the troposphere and stratosphere could thus be the cause of differing particle depolarization ratios of smoke from the two events, although differences in fire conditions cannot be ruled out (Haarig et al., 2018; Zhang et al., 2008).

### 300 3.7 Decay rate of smoke

We present two estimates on the depletion rate of organics for smoke from the 1st event. Our first estimate is computed directly from the zonal mean smoke AOD (Figure: 940b), suggesting a smoke half-life of  $10 \pm 2$  days.

305 Our second estimate on the decay rate of the smoke from the 1st event is based on the CALIOP observations of individual smoke layers marked as circles in Figure 78a. We normalized the smoke signal with the local water vapor concentrations to investigate the evolution of the smoke layer composition. Water data were derived from the satellite-borne microwave limb sounder (MLS). MLS and CALIOP ran in different orbits during the smoke observations ~~limiting the amount of data for the comparison~~ limiting the amount of collocated data to 10 occasions for comparison, spread out in three groups over the first 50 days. We used an exponential fit and computed a corresponding half-life of  $10 \pm 3$  days (Figure: 940c).

310 The two estimates of the decay rate ( $10 \pm 2$  and  $10 \pm 3$  days) presented here are identical to the half-life observed for the stratospheric smoke after the 2017 North American fires ( $10 \pm 3$  days; Martinsson et al. (2022)).

### 3.8 Smoke transport into the stratosphere

315 ~~Most smoke encounters in the stratosphere have been explained through upward transport by pyrocumulonimbus clouds, but studies in recent years indicate that further transport mechanisms cause cross-tropopause transport of smoke. The NA wildfires in 2017 showed that self-lofting by radiative heating of the dense smoke layers caused smoke to rise from the UT into the LMS (e.g. Khaykin et al., 2018; Peterson et al., 2018). Ohmeiser et al. (2021) suggested self-lofting of smoke from the mid-troposphere as cause of extensive smoke layers in the Arctic stratosphere during in the end of 2019 and beginning of 2020. Also, convection downwind fires and isentropic cross-tropopause transport have been suggested as causes of the large~~

320 ~~stratospheric smoke amount after the Australian fires covered in our work (Hirsch & Koren, 2021; Magaritz-Ronen & Raveh-Rubin, 2021).~~

Stratospheric smoke from the 1st event is shown on New-Year's Eve (Figure: 12), two days after the first PyroCb formations from the event. Peterson et al. (2021) coupled this transport to PyroCbs. Hirsch and Koren (2021) argued that smoke injections to the stratosphere may have occurred in the first week of January via cross-tropopause transport by convective clouds south of the fire region (38°S), where the tropopause height is lower. ~~From the 1<sup>st</sup> event we do not see evidence of extensive cross-tropopause transport beyond the initial PyroCb caused smoke injections in the CALIOP data. However~~Furthermore, the temporal evolution in the UVAI (Figure: 104a) indicates that most of the smoke remained north of 40°S ~~in the days following each fire event when most of the UVAI was generated, and only a minor portion was located south of 45°S.~~

330 Magaritz-Rohnen & Raveh-Rubin (2021) suggested that cyclones and isentropic cross-tropopause transport caused smoke transport to the stratosphere over the South Pacific Ocean in the first few days of January. This is to some extent in agreement with the UVAI (Figure: 104), which increased on Jan 2-3 at 140-180°W, 35-40°S, indicating upwards transport of smoke. However, the depolarization ratios during the first week of January ~~does~~ not indicate ~~any frequent~~ cloud formation connected to the smoke layers. Furthermore, CALIOP observations show that large amounts of smoke were present in the stratosphere several days before the suggested cyclonic transport, indicating that PyroCbs were the primary cause of the direct smoke transport to the stratosphere.

340 The 2nd event fires (Jan 4) positioned dense smoke layers in the mid and upper troposphere (Figure: 32). ~~We see evidence of vertical transport during the following week. The generally low depolarization ratios (<0.10) are not indicative of cloud formation. Although convective transport cannot be ruled out completely, Figure 11 illustrates CALIOP observations of individual smoke layer's vertical position relative to the tropopause, including layer tops, mid-points, and bases. These three parameters all show a gradual transport of smoke from the troposphere to the stratosphere, occurring over the course of 1-2 weeks. we~~Such transport could be caused either via ~~suggest~~self-lofting by radiation heating, ~~and via~~ isentropic cross-tropopause transport, ~~or via a combination of the two phenomena. We investigated potential self-lofting of smoke from the 2<sup>nd</sup> event by studying the potential temperature of the smoke layers at their top, mid-point, and base (Figure 11). The increasing potential temperature over time indicates that they were subject to self-lofting by radiation heating as the cause of transport to the stratosphere for smoke from the 2nd event,~~ thus following the rising trend in the stratosphere, as demonstrated in Figure 78b, also in the upper troposphere. The continued addition of smoke, transported from the upper troposphere, ~~most~~ likely resulted in the second peak in the AOD (Figure: 56). Hence, we explain the bimodality in AOD as the combined effect of rapid decay of PyroCb injected smoke, from mostly the 1st event, and ~~slow~~er self-lofting of tropospheric smoke from the 2nd event.

### 3.9 Long-term impact of smoke

The second AOD peak does not show as rapid decay as the first one (Figure 9+0a), likely due to depletion of organics during its long residence in the troposphere before the smoke from the 2nd event entered the stratosphere. A continuous cross-tropopause transport over the course of several weeks also affects the AOD evolution.

Our study indicates that smoke from the 2nd event had larger long-term impact on the stratosphere compared with the 1st event. It constituted 80-90% of the smoke signal six months after injection to the stratosphere (Figure 9+0a). Peterson et al. (2021) reported the opposite, namely that the 1st event injected 2-8 times more smoke than the 2nd event did. Their study focused entirely on injections by PyroCbs. Our study indicates that additional processes, acting on smoke layers deposited in the upper troposphere by pyroCbs, were more important for the long-term stratospheric aerosol load than the direct smoke injection by PyroCbs. This is in part supported by Peterson et al. (2021) who reported more blow-ups and larger area burnt for the 2<sup>nd</sup> event. Smoke from the 2nd event was likely already depleted by photolysis before entering the stratosphere and therefore more resistant to depletion by photochemical processing. Hence, the smoke from the 2nd event fires lead to more long-term impact on the stratospheric AOD and more climate cooling.

### 4 Conclusions

The Australian wildfires in Dec 2019 - Jan 2020 caused the largest elevation of stratospheric aerosol load in the southern extratropics since the large volcanic eruption of Mount Pinatubo in 1991. The long-term stratospheric AOD increase was more than three times that of the North American fires in Aug 2017, and since Pinatubo only matched by the Sarychev (2009) and Raikoke (2019) eruptions.

The AOD showed a bimodal peak in the first weeks, likely caused by the combined effect of multiple ~~injections-additions~~ of smoke to the stratosphere together with photolytic loss of organics in the smoke. Smoke was ~~injected-added~~ to the stratosphere from two events. The 1st event of the fires (starting Dec 29) formed PyroCbs that injected smoke directly into the stratosphere. ~~PyroCbs from the 2<sup>nd</sup> event (Jan 4) injected less smoke to the stratosphere but added large amounts of smoke to the upper troposphere.~~ The stratospheric aerosol load increased rapidly, forming the first peak one and a half week after the first PyroCb injections of smoke. The AOD then dropped rapidly, likely due to aerosol depletion by photolytic loss. ~~Upper tropospheric smoke~~ ~~Smoke~~ from the 2nd event ~~was transported to the stratosphere gradually during the course of 1-2 weeks of the fires (Jan 4) rose from the upper troposphere and started to enter the stratosphere beginning~~ more than a week after the fire, causing a ~~second bimodal~~ peak in the AOD.

We find evidence of photochemical depletion of organics in the smoke, similar to our recent findings after the 2017 North American fires. The half-life of smoke injected directly to the stratosphere was estimated from the zonal mean AOD ( $10 \pm 2$

days) as well as from compositional observations ( $10 \pm 3$  days). These estimates are almost identical to our previous estimate on the smoke half-life from the North American fires in 2017 ( $10 \pm 3$  days, Martinsson et al. (2022)). This indicates that organic depletion is a commonly occurring phenomenon in wildfire smoke. Further, the rapid decay rate implies that photolytic loss has large importance for the removal of organic aerosol in the atmosphere. The rapid depletion of smoke from the 1st event leads to a small long-term impact on the stratospheric aerosol load.

390 Smoke from the 2nd event constituted most of the long-term impact on the stratospheric aerosol load. This was also the stronger of the two events according to the UVAI. Stratospheric smoke AOD from the 2nd event fires decreased slowly, and its morphology indicates chemical processing in the troposphere before entering the stratosphere. Particle properties (lower particle depolarization ratios) for this smoke, compared with smoke from the 1st event fires, suggest that the BC agglomerates collapsed to a more spherical state before entering the stratosphere. The particle residues remained in the stratosphere for up to a year.

The smoke injections from the Australian fires were larger than reported in previous work and caused the largest elevation of the Southern Hemispheric stratospheric aerosol load since the Pinatubo eruption. We argue that wildfire smoke has become an important part of the stratospheric aerosol with climate impact comparable to moderate sized volcanic eruptions. Wildfires are in part natural and in part caused by humans. Future fires are projected to become more intense and frequent due to climate change. Hence, the climate impact of stratospheric wildfire smoke must not be neglected in future climate projections.

#### Data availability

CALIOP V4.10 and 4.11 lidar data are open access products (<https://search.earthdata.nasa.gov/search?fp=CALIPSO>, Hostetler et al., 2006). OMPS-LP aerosol extinction coefficients (Taha et al., 2021) were accessed via [https://disc.gsfc.nasa.gov/datasets/OMPS\\_NPP\\_LP\\_L2\\_AER\\_DAILY\\_2/summary](https://disc.gsfc.nasa.gov/datasets/OMPS_NPP_LP_L2_AER_DAILY_2/summary). OMPS-NM V2.1 UV aerosol index (Torres, 2019) was obtained from <https://worldview.earthdata.nasa.gov> and <https://ozoneaq.gsfc.nasa.gov/data/omps/#prods=84,101>. H<sub>2</sub>O data from MLS were obtained from [https://disc.gsfc.nasa.gov/datasets?page=1&keywords=ML2H2O\\_005](https://disc.gsfc.nasa.gov/datasets?page=1&keywords=ML2H2O_005) (Lambert et al., 2020).

#### Author contribution

410 JF designed the study, performed most of the data analysis, and wrote most of the paper. BGM undertook data analysis on individual smoke layers, and wrote part of the methods section. MKS produced the supplementary. All authors contributed to discussions and commented on the manuscript.

### Competing interests

The authors declare that they have no conflict of interest.

### 415 Financial support

The Swedish research council for sustainable development, Formas, contract 2018-00973 and 2020-00997

Swedish National Space Agency, contract 2022-00157

### 5 References

- Abram, N. J., Henley, B. J., Gupta, A. sen, Lippmann, T. J. R., Clarke, H., Dowdy, A. J., Sharples, J. J., Nolan, R. H., Zhang,  
420 T., Wooster, M. J., Wurtzel, J. B., Meissner, K. J., Pitman, A. J., Ukkola, A. M., Murphy, B. P., Tapper, N. J., & Boer,  
M. M. (2021). Connections of climate change and variability to large and extreme forest fires in southeast Australia. In  
Communications Earth and Environment. <https://doi.org/10.1038/s43247-020-00065-8>
- Andersson, S. M., Martinsson, B. G., Friberg, J., Brenninkmeijer, C. A. M., Rauthe-Schöch, A., Hermann, M., van Velthoven,  
P. F. J., & Zahn, A. (2013). Composition and evolution of volcanic aerosol from eruptions of Kasatochi, Sarychev and  
425 Eyjafjallajökull in 2008-2010 based on CARIBIC observations. *Atmospheric Chemistry and Physics*, 13(4), 1781–1796.  
<https://doi.org/10.5194/acp-13-1781-2013>
- Andersson, S. M., Martinsson, B. G., Vernier, J. P., Friberg, J., Brenninkmeijer, C. A. M., Hermann, M., van Velthoven, P. F.  
J., & Zahn, A. (2015). Significant radiative impact of volcanic aerosol in the lowermost stratosphere. *Nature*  
*Communications*, 6(May), 1–8. <https://doi.org/10.1038/ncomms8692>
- 430 Baars, H., Ansmann, A., Ohneiser, K., Haarig, M., Engelmann, R., Althausen, D., Hanssen, I., Gausa, M., Pietruczuk, A.,  
Szkop, A., Stachlewska, I. S., Wang, D., Reichardt, J., Skupin, A., Mattis, I., Trickl, T., Vogelmann, H., Navas-Guzmán,  
F., Haeefe, A., ... Pappalardo, G. (2019). The unprecedented 2017-2018 stratospheric smoke event: Decay phase and  
aerosol properties observed with the EARLINET. *Atmospheric Chemistry and Physics*. <https://doi.org/10.5194/acp-19-15183-2019>
- 435 Boer, M. M., Resco de Dios, V., & Bradstock, R. A. (2020). Unprecedented burn area of Australian mega forest fires. In *Nature*  
*Climate Change*. <https://doi.org/10.1038/s41558-020-0716-1>
- Boone, C. D., Bernath, P. F., Labelle, K., & Crouse, J. (2022). Stratospheric Aerosol Composition Observed by the  
Atmospheric Chemistry Experiment Following the 2019 Raikoke Eruption. *Journal of Geophysical Research:*  
*Atmospheres*. <https://doi.org/10.1029/2022JD036600>
- 440 Das, S., Colarco, P. R., Oman, L. D., Taha, G., & Torres, O. (2021). The long-term transport and radiative impacts of the 2017  
British Columbia pyrocumulonimbus smoke aerosols in the stratosphere. *Atmospheric Chemistry and Physics*.  
<https://doi.org/10.5194/acp-21-12069-2021>

- Fan, M., Chen, L., Li, S., Zou, M., Su, L., & Tao, J. (2016). The effects of morphology and water coating on the optical properties of soot aggregates. *Aerosol and Air Quality Research*. <https://doi.org/10.4209/aaqr.2015.04.0250>
- 445 Friberg, J., Martinsson, B. G., Andersson, S. M., Brenninkmeijer, C. A. M., Hermann, M., van Velthoven, P. F. J., & Zahn, A. (2014). Sources of increase in lowermost stratospheric sulphurous and carbonaceous aerosol background concentrations during 1999-2008 derived from CARIBIC flights. *Tellus, Series B: Chemical and Physical Meteorology*, 66(1). <https://doi.org/10.3402/tellusb.v66.23428>
- 450 Friberg, J., Martinsson, B. G., Andersson, S. M., & Sandvik, O. S. (2018). Volcanic impact on the climate - The stratospheric aerosol load in the period 2006-2015. *Atmospheric Chemistry and Physics*, 18(15), 11149–11169. <https://doi.org/10.5194/acp-18-11149-2018>
- Fromm, M., Alfred, J., Hoppel, K., Hornstein, J., Bevilacqua, R., Shettle, E., Servranckx, R., Li, Z., & Stocks, B. (2000). Observations of Boreal forest fire smoke in the stratosphere by POAM III, SAGE II, and lidar in 1998. *Geophysical Research Letters*, 27(9), 1407–1410. <https://doi.org/10.1029/1999GL011200>
- 455 Fromm, M. D., & Servranckx, R. (2003). Transport of forest fire smoke above the tropopause by supercell convection. *Geophysical Research Letters*, 30(10), n/a-n/a. <https://doi.org/10.1029/2002GL016820>
- Fromm, M., Kablick, G., Nedoluha, G., Carboni, E., Grainger, R., Campbell, J., & Lewis, J. (2014). Correcting the record of volcanic stratospheric aerosol impact: Nabro and Sarychev Peak. *Journal of Geophysical Research*, 119(17), 10,343–10,364. <https://doi.org/10.1002/2014JD021507>
- 460 Garofalo, L. A., Pothier, M. A., Levin, E. J. T., Campos, T., Kreidenweis, S. M., & Farmer, D. K. (2019). Emission and Evolution of Submicron Organic Aerosol in Smoke from Wildfires in the Western United States. *ACS Earth and Space Chemistry*. <https://doi.org/10.1021/acsearthspacechem.9b00125>
- Haarig, M., Ansmann, A., Baars, H., Jimenez, C., Veselovskii, I., Engelmann, R., & Althausen, D. (2018). Depolarization and lidar ratios at 355, 532, and 1064 nm and microphysical properties of aged tropospheric and stratospheric
- 465 Canadian wildfire smoke. *Atmospheric Chemistry and Physics*. <https://doi.org/10.5194/acp-18-11847-2018>
- Hirsch, E., & Koren, I. (2021). Record-breaking aerosol levels explained by smoke injection into the stratosphere. *Science*. <https://doi.org/10.1126/science.abe1415>
- Hodzic, A., Madronich, S., Kasibhatla, P. S., Tyndall, G., Aumont, B., Jimenez, J. L., Lee-Taylor, J., & Orlando, J. (2015). Organic photolysis reactions in tropospheric aerosols: Effect on secondary organic aerosol formation and lifetime.
- 470 *Atmospheric Chemistry and Physics*. <https://doi.org/10.5194/acp-15-9253-2015>
- Kablick, G. P., Allen, D. R., Fromm, M. D., & Nedoluha, G. E. (2020). Australian PyroCb Smoke Generates Synoptic-Scale Stratospheric Anticyclones. *Geophysical Research Letters*. <https://doi.org/10.1029/2020GL088101>
- Khaykin, S., Legras, B., Bucci, S., Sellitto, P., Isaksen, I., Tencé, F., Bekki, S., Bourassa, A., Rieger, L., Zawada, D., Jumelet, J., & Godin-Beekmann, S. (2020). The 2019/20 Australian wildfires generated a persistent smoke-charged vortex rising
- 475 up to 35 km altitude. *Communications Earth and Environment*, 1(1), 22. <https://doi.org/10.1038/s43247-020-00022-5>

- Khaykin, S. M., Godin-Beekmann, S., Hauchecorne, A., Pelon, J., Ravetta, F., & Keckhut, P. (2018). Stratospheric Smoke With Unprecedentedly High Backscatter Observed by Lidars Above Southern France. *Geophysical Research Letters*, 45(3), 1639–1646. <https://doi.org/10.1002/2017GL076763>
- 480 Kloss, C., Berthet, G., Sellitto, P., Ploeger, F., Taha, G., Tidiga, M., Eremenko, M., Bossolasco, A., Jégou, F., Renard, J.-B., & Legras, B. (2020). Stratospheric aerosol layer perturbation caused by the 2019 Raikoke and Ulawun eruptions and climate impact. *Atmospheric Chemistry and Physics Discussions*.
- Knepp, T. N., Thomason, L., Kovilakam, M., Tackett, J., Kar, J., Damadeo, R., & Flittner, D. (2022). Identification of smoke and sulfuric acid aerosol in SAGE III/ISS extinction spectra. *Atmospheric Measurement Techniques*. <https://doi.org/10.5194/amt-15-5235-2022>
- 485 Kremser, S., Thomason, L. W., von Hobe, M., Hermann, M., Deshler, T., Timmreck, C., Toohey, M., Stenke, A., Schwarz, J. P., Weigel, R., Fueglistaler, S., Prata, F. J., Vernier, J. P., Schlager, H., Barnes, J. E., Antuña-Marrero, J. C., Fairlie, D., Palm, M., Mahieu, E., ... Meland, B. (2016). Stratospheric aerosol—Observations, processes, and impact on climate. *Reviews of Geophysics*, 54(2), 278–335. <https://doi.org/10.1002/2015RG000511>
- 490 Lambert, A., Read, W., and Livesey, N.: MLS/Aura Level 2 Water Vapor (H<sub>2</sub>O) Mixing Ratio V005, Greenbelt, MD, USA, Goddard Earth Sciences Data and Information Services Center (GESDISC), <https://doi.org/10.5067/Aura/MLS/DATA2508>, 2020.
- Lestrelin, H., Legras, B., Podglajen, A., & Salihoglu, M. (2021). Smoke-charged vortices in the stratosphere generated by wildfires and their behaviour in both hemispheres: Comparing Australia 2020 to Canada 2017. *Atmospheric Chemistry and Physics*. <https://doi.org/10.5194/acp-21-7113-2021>
- 495 Livesey, N. J., Read, W. G., Wagner, P. A., Froidevaux, L., Santee, M. L., Schwartz, M. J., Lambert, A., Manney, G. L., Valle, L. F. M., Pumphrey, H. C., Fuller, R. A., Jarnot, R. F., Knosp, B. W., and Lay, R. R.: EOS MLS Version 5.0x Level 2 and 3 data quality and description document, Tech. rep., Jet Propulsion Laboratory D734 105336 Rev. A, <https://mls.jpl.nasa.gov/publications> (last access: May 2021, 2020).
- Lurton, T., Jégou, F., Berthet, G., Renard, J. B., Clarisse, L., Schmidt, A., Brogniez, C., & Roberts, T. J. (2018). Model simulations of the chemical and aerosol microphysical evolution of the Sarychev Peak 2009 eruption cloud compared to in situ and satellite observations. *Atmospheric Chemistry and Physics*. <https://doi.org/10.5194/acp-18-3223-2018>
- 500 Magaritz-Ronen, L., & Raveh-Rubin, S. (2021). Wildfire Smoke Highlights Troposphere-to-Stratosphere Pathway. In *Geophysical Research Letters*. <https://doi.org/10.1029/2021GL095848>
- Martinsson, B. G., Brenninkmeijer, C. A. M., Cam, S. A., Hermann, M., Heue, K. P., van Velthoven, P. F. J., & Zahn, A. (2009). Influence of the 2008 Kasatochi volcanic eruption on sulfurous and carbonaceous aerosol constituents in the lower stratosphere. *Geophysical Research Letters*, 36(12), 1–5. <https://doi.org/10.1029/2009GL038735>
- 505 Martinsson, B. G., Friberg, J., Sandvik, O. S., Hermann, M., van Velthoven, P. F. J., & Zahn, A. (2019). Formation and composition of the UTLS aerosol. *Npj Climate and Atmospheric Science*. <https://doi.org/10.1038/s41612-019-0097-1>



- 510 Martinsson, B. G., Friberg, J., Sandvik, O. S., & Sporre, M. K. (2022). Five-satellite-sensor study of the rapid decline of wildfire smoke in the stratosphere. *Atmos. Chem. Phys.*, 22(6), 3967–3984. <https://doi.org/10.5194/acp-22-3967-2022>
- Molina, M. J., Ivanov, A. V., Trakhtenberg, S., & Molina, L. T. (2004). Atmospheric evolution of organic aerosol. *Geophysical Research Letters*. <https://doi.org/10.1029/2004GL020910>
- 515 Ohneiser, K., Ansmann, A., Chudnovsky, A., Engelmann, R., Ritter, C., Veselovskii, I., Baars, H., Gebauer, H., Griesche, H., Radenz, M., Hofer, J., Althausen, D., Dahlke, S., & Maturilli, M. (2021). The unexpected smoke layer in the High Arctic winter stratosphere during MOSAiC 2019-2020. *Atmospheric Chemistry and Physics*. <https://doi.org/10.5194/acp-21-15783-2021>
- Ohneiser, K., Ansmann, A., Kaifler, B., Chudnovsky, A., Barja, B., Knopf, D. A., Kaifler, N., Baars, H., Seifert, P., Villanueva, D., Jimenez, C., Radenz, M., Engelmann, R., Veselovskii, I., & Zamorano, F. (2022). Australian wildfire smoke in the stratosphere: The decay phase in 2020/2021 and impact on ozone depletion. *Atmospheric Chemistry and Physics*. <https://doi.org/10.5194/acp-22-7417-2022>
- 520 Ohneiser, K., Ansmann, A., Witthuhn, J., Deneke, H., Chudnovsky, A., Walter, G., & Senf, F. (2023). Self-lofting of wildfire smoke in the troposphere and stratosphere: simulations and space lidar observations. *Atmospheric Chemistry and Physics*. <https://doi.org/10.5194/acp-23-2901-2023>
- 525 Peterson, D. A., Campbell, J. R., Hyer, E. J., Fromm, M. D., Kablick, G. P., Cossuth, J. H., & DeLand, M. T. (2018). Wildfire-driven thunderstorms cause a volcano-like stratospheric injection of smoke. *Npj Climate and Atmospheric Science*. <https://doi.org/10.1038/s41612-018-0039-3>
- Peterson, D. A., Fromm, M. D., McRae, R. H. D., Campbell, J. R., Hyer, E. J., Taha, G., Camacho, C. P., Kablick, G. P., Schmidt, C. C., & DeLand, M. T. (2021). Australia's Black Summer pyrocumulonimbus super outbreak reveals potential for increasingly extreme stratospheric smoke events. *Npj Climate and Atmospheric Science*. <https://doi.org/10.1038/s41612-021-00192-9>
- 530 Rieger, L. A., Bourassa, A. E., & Degenstein, D. A. (2015). Merging the OSIRIS and SAGE II stratospheric aerosol records. *Journal of Geophysical Research*, 120(17), 8890–8904. <https://doi.org/10.1002/2015JD023133>
- Sareen, N., Moussa, S. G., & McNeill, V. F. (2013). Photochemical aging of light-absorbing secondary organic aerosol material. *Journal of Physical Chemistry A*. <https://doi.org/10.1021/jp309413j>
- 535 Solomon, S., Daniel, J. S., Neely, R. R., Vernier, J.-P., Dutton, E. G., & Thomason, L. W. (2011). The Persistently Variable “Background” Stratospheric Aerosol Layer and Global Climate Change. *Science*, 333(6044), 866–870. <https://doi.org/10.1126/science.1206027>
- Taha, G., Loughman, R., Zhu, T., Thomason, L., Kar, J., Rieger, L., & Bourassa, A. (2021). OMPS LP Version 2.0 multi-wavelength aerosol extinction coefficient retrieval algorithm. *Atmospheric Measurement Techniques*. <https://doi.org/10.5194/amt-14-1015-2021>
- 540

- Thomason, L. W., Ernest, N., Millán, L., Rieger, L., Bourassa, A., Vernier, J. P., Manney, G., Luo, B., Arfeuille, F., & Peter, T. (2018). A global space-based stratospheric aerosol climatology: 1979-2016. *Earth System Science Data*, 10(1), 469–492. <https://doi.org/10.5194/essd-10-469-2018>
- 545 Torres, O., OMPS-NPP L2 NM Aerosol Index swath orbital V2, Greenbelt, MD, USA, Goddard Earth Sciences Data and Information Services Center (GES DISC), Accessed: 2022-10-03, 10.5067/40L92G8144IV
- Vernier, J. P., Thomason, L. W., Pommereau, J. P., Bourassa, A., Pelon, J., Garnier, A., Hauchecorne, A., Blanot, L., Trepte, C., Degenstein, D., & Vargas, F. (2011). Major influence of tropical volcanic eruptions on the stratospheric aerosol layer during the last decade. *Geophysical Research Letters*, 38(12), 1–8. <https://doi.org/10.1029/2011GL047563>
- 550 Yu, P., Toon, O. B., Bardeen, C. G., Zhu, Y., Rosenlof, K. H., Portmann, R. W., Thornberry, T. D., Gao, R. S., Davis, S. M., Wolf, E. T., de Gouw, J., Peterson, D. A., Fromm, M. D., & Robock, A. (2019). Black carbon lofted wildfire smoke high into the stratosphere to form a persistent plume. *Science*. <https://doi.org/10.1126/science.aax1748>
- Zawadowicz, M. A., Lee, B. H., Shrivastava, M., Zelenyuk, A., Zaveri, R. A., Flynn, C., Thornton, J. A., & Shilling, J. E. (2020). Photolysis Controls Atmospheric Budgets of Biogenic Secondary Organic Aerosol. *Environmental Science and Technology*. <https://doi.org/10.1021/acs.est.9b07051>
- 555 Zhang, R., Khalizov, A. F., Pagels, J., Zhang, D., Xue, H., & McMurry, P. H. (2008). Variability in morphology, hygroscopicity, and optical properties of soot aerosols during atmospheric processing. *Proceedings of the National Academy of Sciences of the United States of America*. <https://doi.org/10.1073/pnas.0804860105>

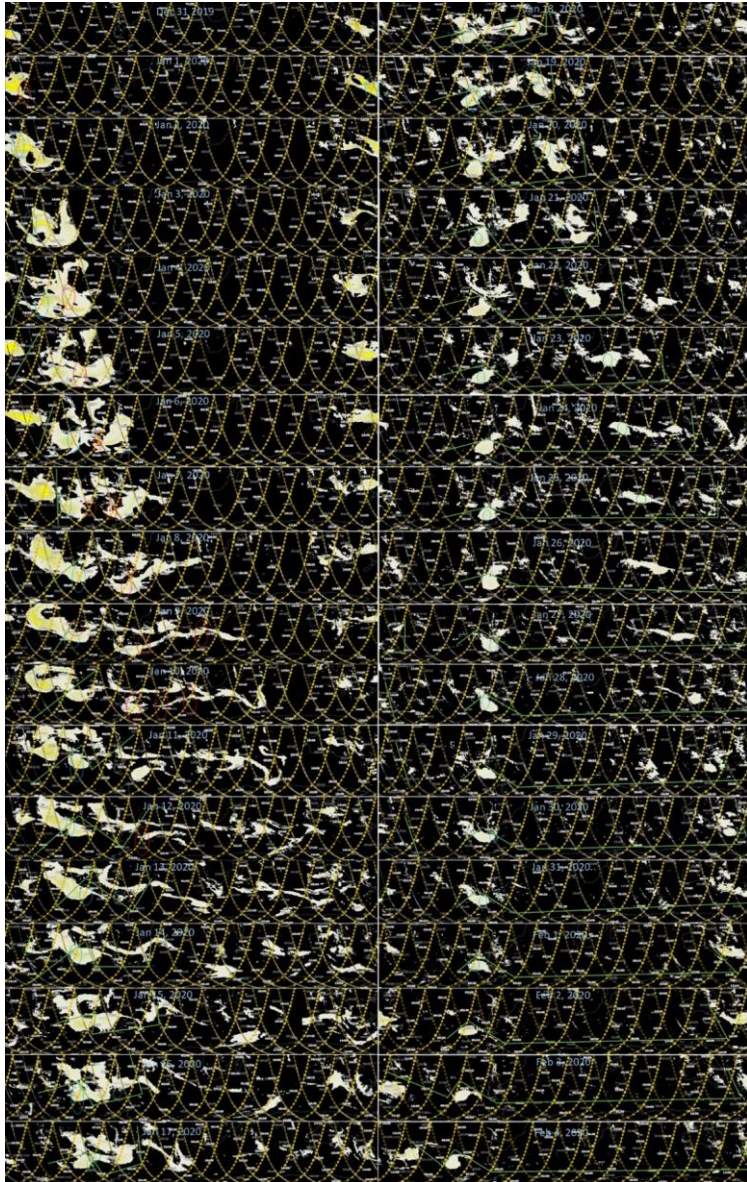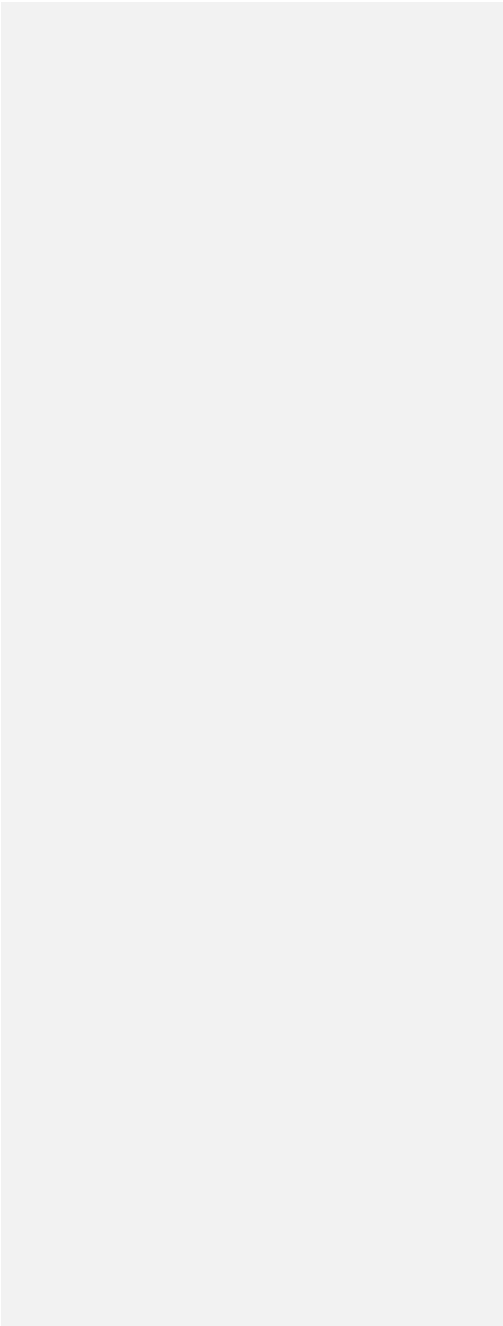

560

**Figure 1. Daily OMPS-NM UVAI maps from 2019-12-31 to 2020-02-04. These data are used in connection with vertical information from CALIOP, where we had no meaningful data on 2019-12-29 and no data at all 2019-12-30 from the overpass of the region of elevated UVAI. Ovals indicate positions of individual layers used in Fig. new8. Blue, red and green indicate 1<sup>st</sup> fire main layer, 1<sup>st</sup> fire minor layers and 2<sup>nd</sup> fire, respectively. The green line indicates approximate limit between layers from the 1<sup>st</sup> and 2<sup>nd</sup> fire.**

565

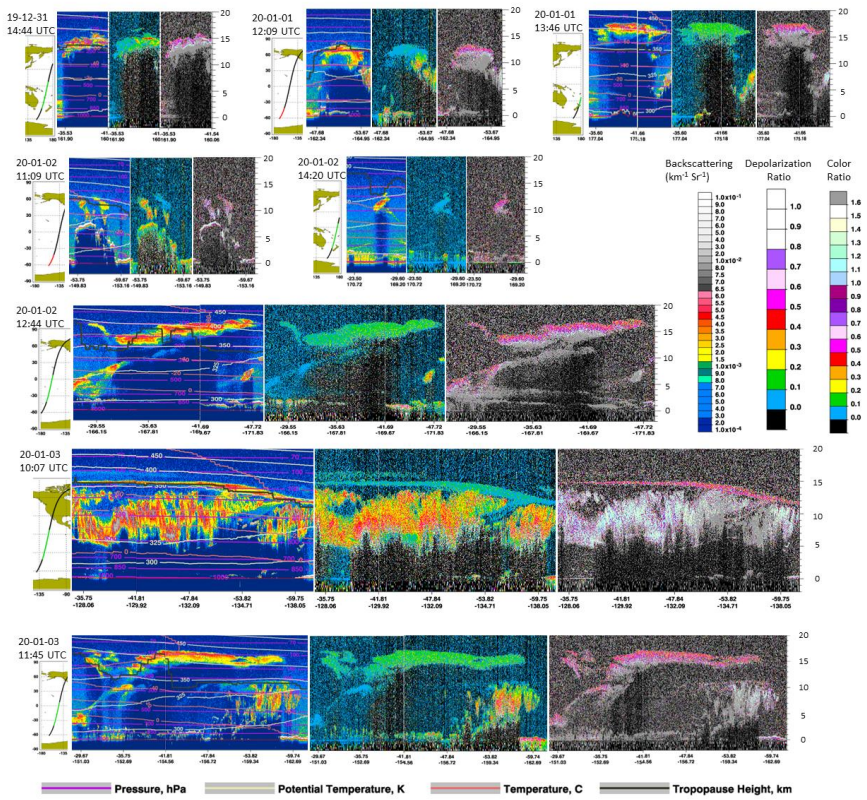

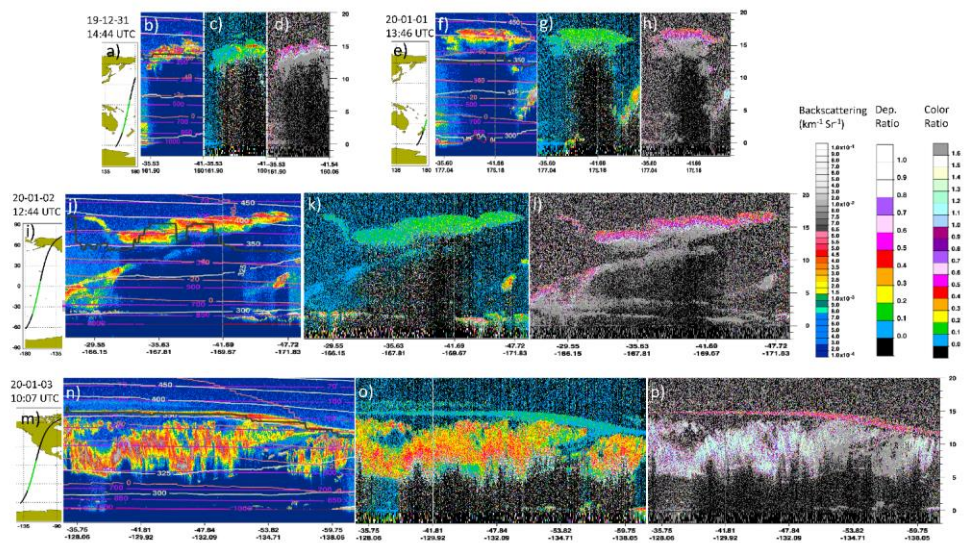

**Figure 12.** Four days CALIOP curtains from early overpasses of the region affected by the 1<sup>st</sup> fire event that started on 2019-12-29. The day of the fire did not show elevated smoke levels from the single CALIOP overpass of the region, and the day after (2019-12-30) no measurements were taken in the fire region due to malfunction. Left panels show attenuated backscattering, mid panels, the volume depolarization ratios, and right panels the attenuated color ratios. Strong attenuation of the lidar beam is indicated by the dark blue colors below smoke layer, as well as through the higher color ratios at the bottom of the smoke layers. Meteorological parameters are marked with lines; pressure levels (purple), potential temperatures (white), temperatures (orange), and tropopause heights (grey). See the supplementary for further curtain plots.

570

575

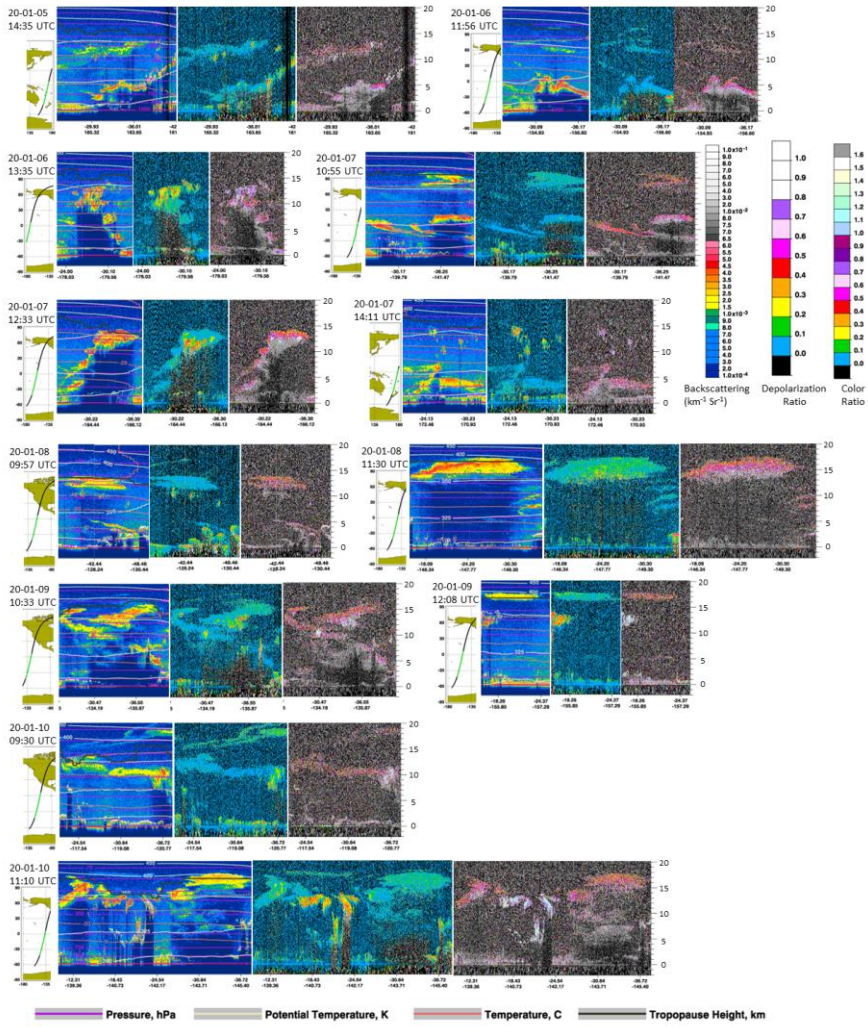

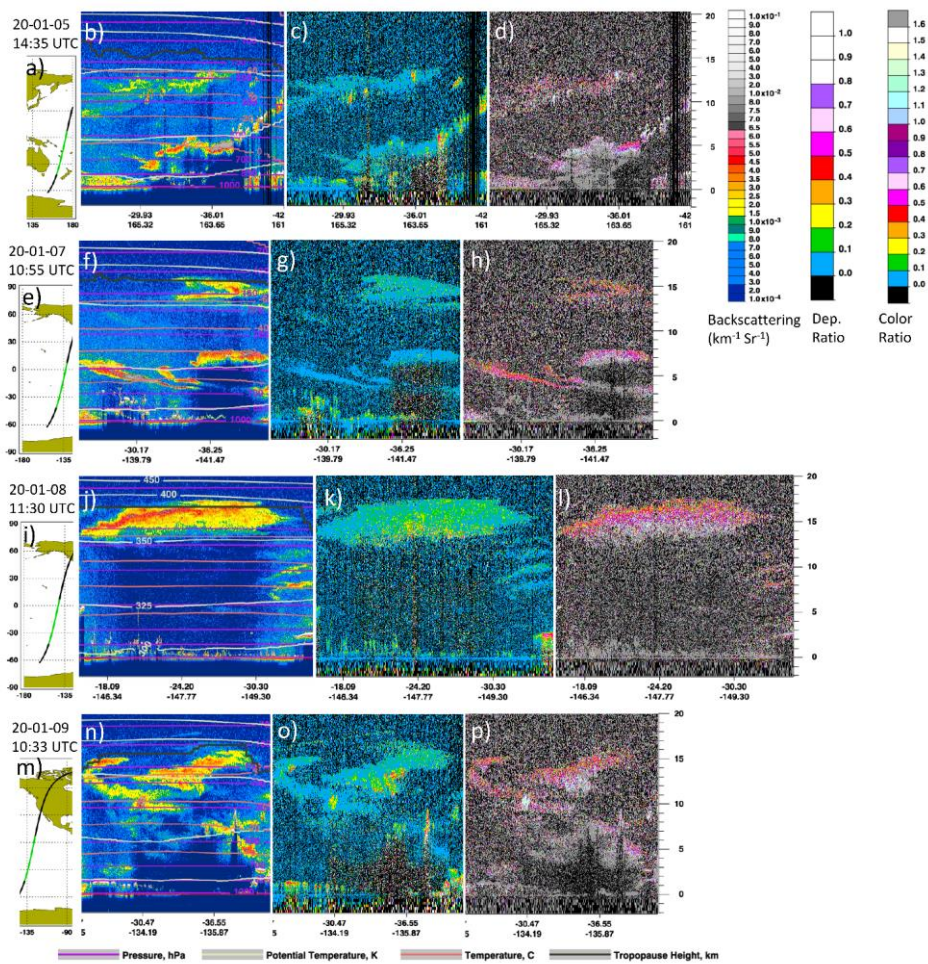

Figure 23. Same as Figure 1, but for smoke layers from the 2<sup>nd</sup> fire event (2020-01-04). The first two overpasses of the smoke layers according to OMPS-NM (one each on Jan 4 and 5) did not show smoke in the upper troposphere nor in the stratosphere, and are therefore not shown here.

580

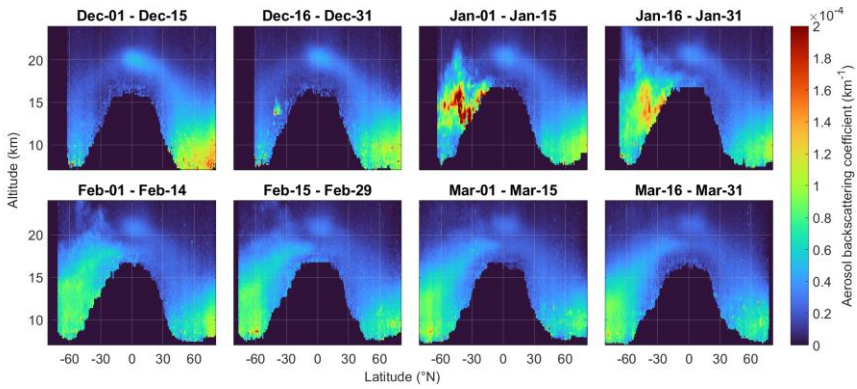

Figure 34 | Latitudinal and vertical distribution of smoke in Dec 2019 – Mar 2020. CALIOP zonal mean aerosol backscattering coefficients during the first three months after, and one month preceding, the first stratospheric injection. This parameter can be viewed as an optical version of aerosol concentration.

585



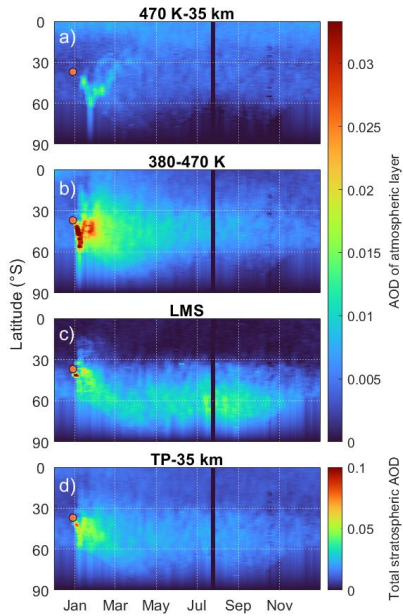

Figure 54 | Latitude and time distribution of the stratospheric aerosol load. Aerosol optical depth (AOD) in three stratospheric layers and in all layers combined. The upper (a) and mid (b) layers are the deep and shallow branches of Brewer-Dobson circulation, and the lowest layer (c) is the lowermost stratosphere. The orange dot shows the approximate latitude and the time of the 1<sup>st</sup> fire.

590

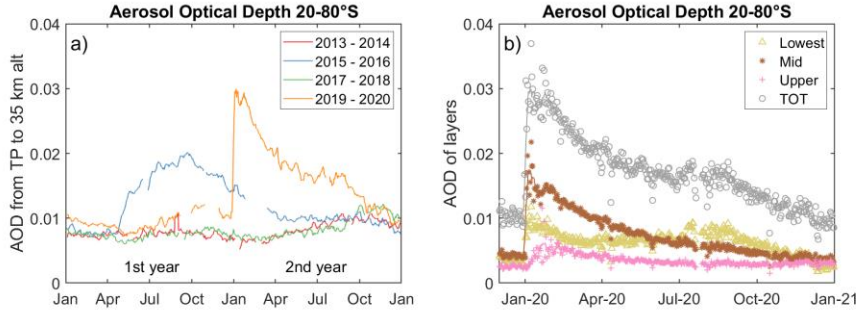

Figure 56 | Wildfire impact on the stratospheric aerosol load in the southern extratropics. a) The aerosol optical depth (AOD) from CALIOP in 2013-2020 divided into two-year-steps, illustrating the impact of the Australian wildfire in 2019-2020, together with that from the Calbuco eruption in 2015-2016, and background levels 2013-2014 and 2017-2018. b) the stratospheric AOD from CALIOP during Dec 2019 – Jul 2020 separated into the three layers used in Figure 42. Lines mark 8-day smoothed AOD data, and symbols are daily means of the LMS (yellow), shallow (brown) and upper (pink) BD-branches, and the total stratospheric AOD (grey).

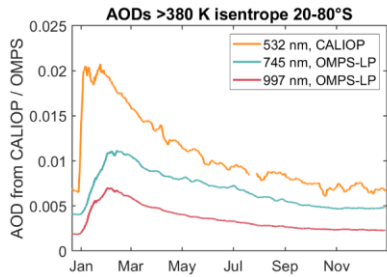

Figure 67 | Wildfire impact on stratospheric AODs at three wavelengths in the southern extratropics from CALIOP and OMPS-LP. The stratospheric column above the 380 K isentrope column at 20-80°S.

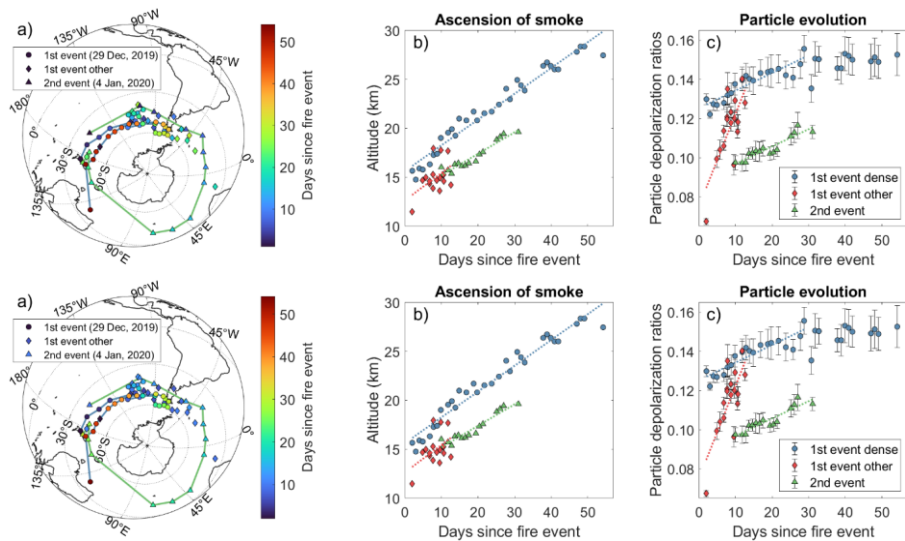

605

**Figure 78** | The smoke transport and chemical evolution in the stratosphere. a) Geographical transport of the smoke from the two injection events. b) Ascension of the smoke clouds, and c) temporal evolution of the particle depolarization ratios for the two injection events. All data taken on individual smoke clouds in the stratosphere. Circles mark data taken in the dense isolated cloud from the 1<sup>st</sup> event fires, diamonds are other data from the 1<sup>st</sup> fire, and triangles mark smoke data from the 2<sup>nd</sup> event fires.

610

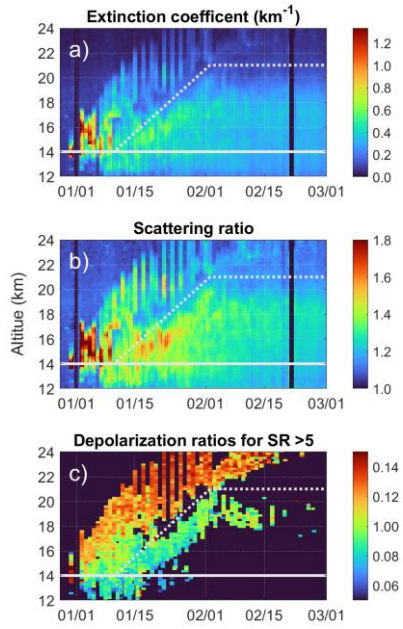

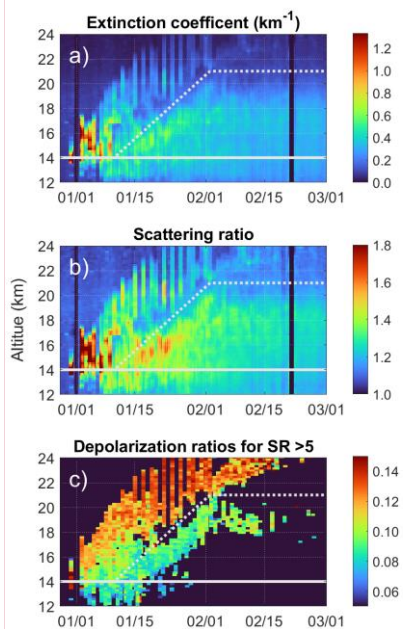

**Kommentarad [JF2]:** Updated the tick labels according to comment from Reviewer #2. (1.0 was changed to 0.10)

615 **Figure 98** | Separation of the smoke from the two phases of the fires. Stratospheric zonal mean (20-80°S) a) Extinction coefficients, b), scattering ratios (SR), and c) depolarization ratios where SR values are higher than 5. The dashed and full lines represents the separation line of smoke for the two phases of the fire, and the minimum altitude used to compute the AODs for the two phases of fires.

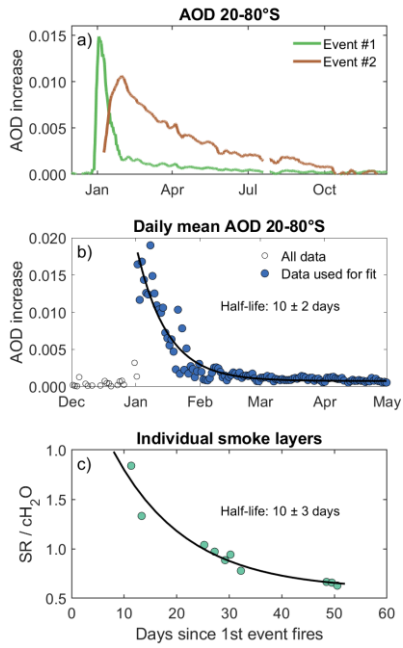

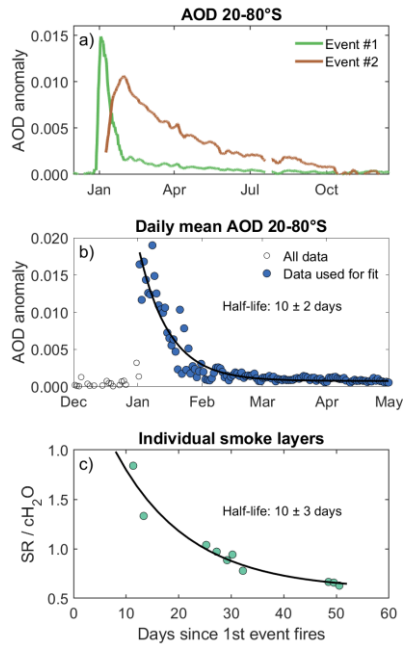

**Kommentarad [JF3]:** We changed the y-axis labels in Figure 9a and b from 'AOD increase' to 'AOD anomaly'.

Figure 9a | Smoke decay in the dense isolated cloud from the 1<sup>st</sup> event. a) 8-day running mean of the background subtracted Stratospheric zonal mean AOD at 20-80°S above 14 km altitude for the 1<sup>st</sup> and 2<sup>nd</sup> phase, respectively. b) Daily means of background subtracted AODs for the 1<sup>st</sup> phase only, and c) smoke data from individual smoke layers (scattering ratios, SR, from CALIOP) normalized with water vapor concentrations (CH<sub>2</sub>O, from MLS). The exponential fits correspond to a smoke half-life of 10 ± 2 (b) and 10 ± 3 days (c).

620

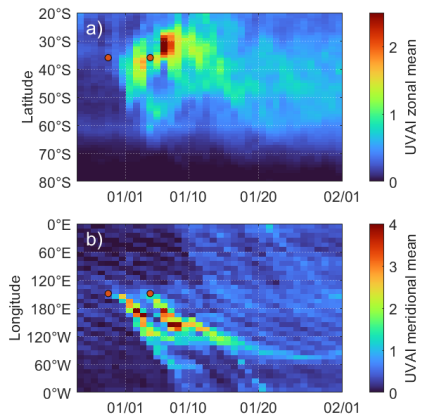

625 **Figure 10.1.** | Evolution of the UV aerosol index (UVAI) during the first weeks after the fire events for a) zonal means and b) meridional means. The locations and dates of the events are marked by orange dots. The lower UVAI range in a) stem from the method of area weighting data.



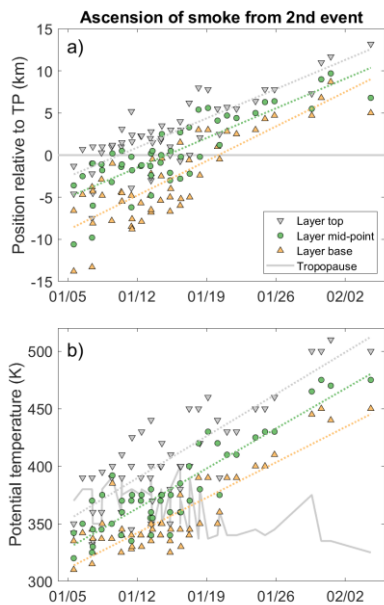

**Figure 11.** | Ascension of 2<sup>nd</sup> event smoke layers for a) smoke layer position relative to the tropopause (TP), and b) smoke layer potential temperature. Circles mark the layer midpoints, downward and upward pointing triangles mark the layer tops and bases, and the grey line marks the tropopause. Data were retrieved from CALIOP curtain plots (see supplementary for further details), where layers with layer tops below 8km were included in the graph.

**Table 1** | Wildfire and volcanic impact on aerosol optical depths and radiative forcing. The one-year AOD increase in the extratropics (20-80°N/S) after the largest volcanic eruptions and wildfires since 2006 compared to the Australian wildfires.

| Date       | Location  |      | Event name | 1 y AOD incr. CALIOP | 1 y AOD incr. CALIOP rel. Aus. Fires |
|------------|-----------|------|------------|----------------------|--------------------------------------|
|            | Lon.      | Lat. |            |                      |                                      |
| 2008-08-07 | 176°W     | 52°N | Kasatochi  | 0.0059               | 63%                                  |
| 2009-06-12 | 153°E     | 48°N | Sarychev   | 0.0090               | 97%                                  |
| 2011-06-12 | 42°E      | 13°N | Nabro      | 0.0057               | 61%                                  |
| 2015-04-23 | 73°W      | 41°S | Calbuco    | 0.0080               | 86%                                  |
| 2017-08-12 | 120-125°W | 49°N | N.Am.Fires | 0.0027               | 29%                                  |
| 2019-06-22 | 153°E     | 48°N | Raikoke    | 0.0104               | 110%                                 |

2019-12-29 - 147-151°E 34-38°S Aus. Fires 0.0093 -  
2020-01-04

---

## Supplementary to: Short and long-term stratospheric impact of smoke from the 2019/2020 Australian wildfires

By: Johan Friberg, Bengt G. Martinsson, and Moa K. Sporre

### Text S1:

The figures (S2-S42) were used to track the smoke layers from the Australian fires. The figures consist of UV-Aerosol index (UVAI) images (top figures) with included CALIOP swath paths from the same day. Here, the lower threshold for UVAI was set to 0.75 to exclude aerosol at low altitude. The curtain plots from the CALIOP swaths (attenuation and depolarization) are shown below in each figure. Some days contained too many CALIOP curtain plots with smoke layers to show in a single figure. The plots for those days was divided into two figures. Mainly CALIOP nighttime swaths has been used in the analysis since the daytime data have low signal to noise ratios. Note that the CALIOP nighttime images are not co-occurring with the UVAI data due to temporal displacement between the satellites. Thus, the smoke layers are often placed further east in the UVAI compared to when the CALIOP image was recorded due to westward transport of the fire clouds.

In the figures, blue circles/lines mark aerosol from the 1<sup>st</sup> event in the isolated dense cloud. Red circles/lines mark aerosol from the 1<sup>st</sup> event that did not belong to the isolated cloud. These could not be tracked for as many days as the smoke layers in the dense smoke cloud. Green circles/lines mark aerosol from the 2<sup>nd</sup> event. The CALIOP swaths was used to determine the altitude of aerosol from the 2<sup>nd</sup> event and to track its movement over time. In the attenuated backscatter figures, the tropopause height in connection to the fire clouds has been determined (white lines). The layer bases could not be determined directly from the attenuated backscattering due to attenuation by smoke aerosol. We therefore determined the layer bases from the depolarization ratio plots. The layer tops (white lines long dashes), layer mid-points (white line) and layer bases (white lines with narrow dashes) are marked in these plots. The orange lines in the plots mark the separation between the smoke layers from the 1<sup>st</sup> and 1<sup>nd</sup> event.

The smoke layers are distinguished and separated from clouds by their depolarization ratios. Smoke layers have depolarization ratios  $<0.20$ . Since the UVAI values are influenced by the altitude of the aerosol, a high UVAI do not always result in a strong attenuation signal in the CALIOP data, and vice versa. Some Caliop curtain plots were excluded from the analysis since the aerosol attenuation signals were too weak even though the UVAI indicate presence of smoke aerosol. As the smoke layers are dispersed over time they become more difficult to track and determining their altitude is no longer possible.

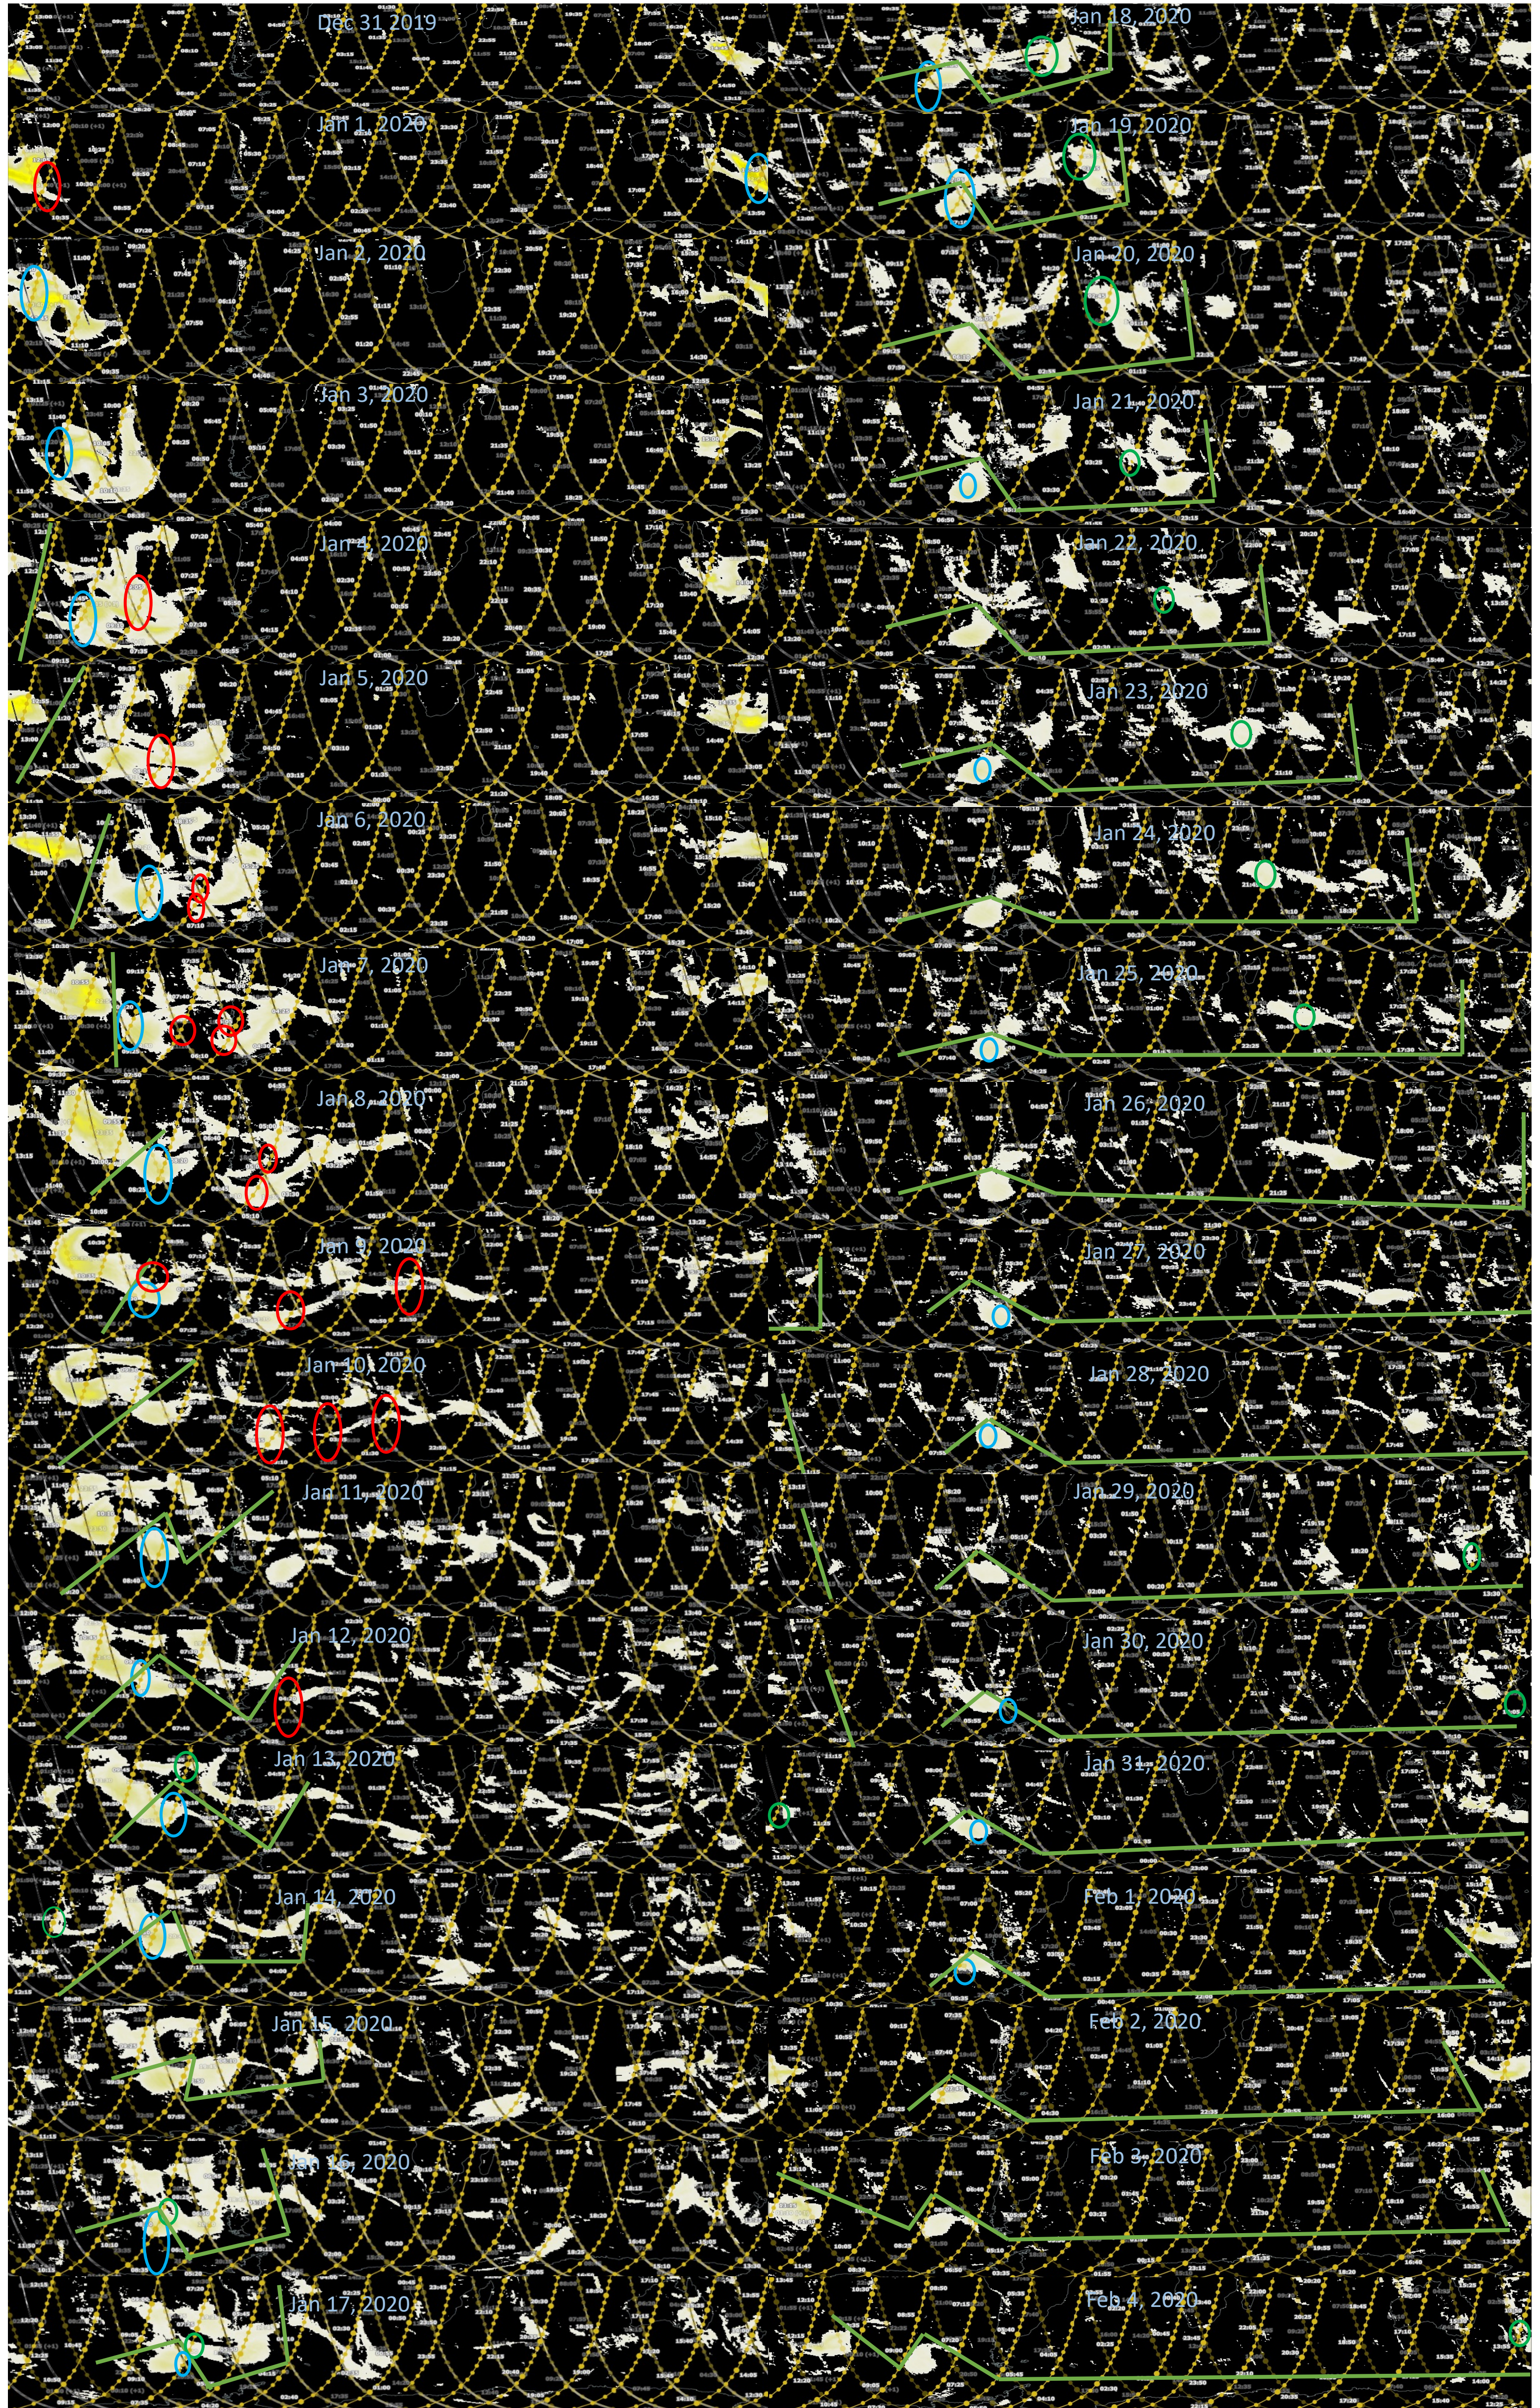

Figure S1. Daily OMPS-NM UV-AI maps from 2019-12-31 to 2020-02-04. These data are used in connection with vertical information from CALIOP, where we had no meaningful data on 2019-12-29 and no data at all 2019-12-30 from the overpass of the region of elevated UV-AI. Ovals indicate positions of individual layers used in Figure 7: Blue indicate the dense isolated smoke from the 1st event fires, red indicate other smoke from the 1st fire, and green indicate smoke from the 2nd event fires. The green line indicates approximate limit between layers from the 1st and 2nd fire.

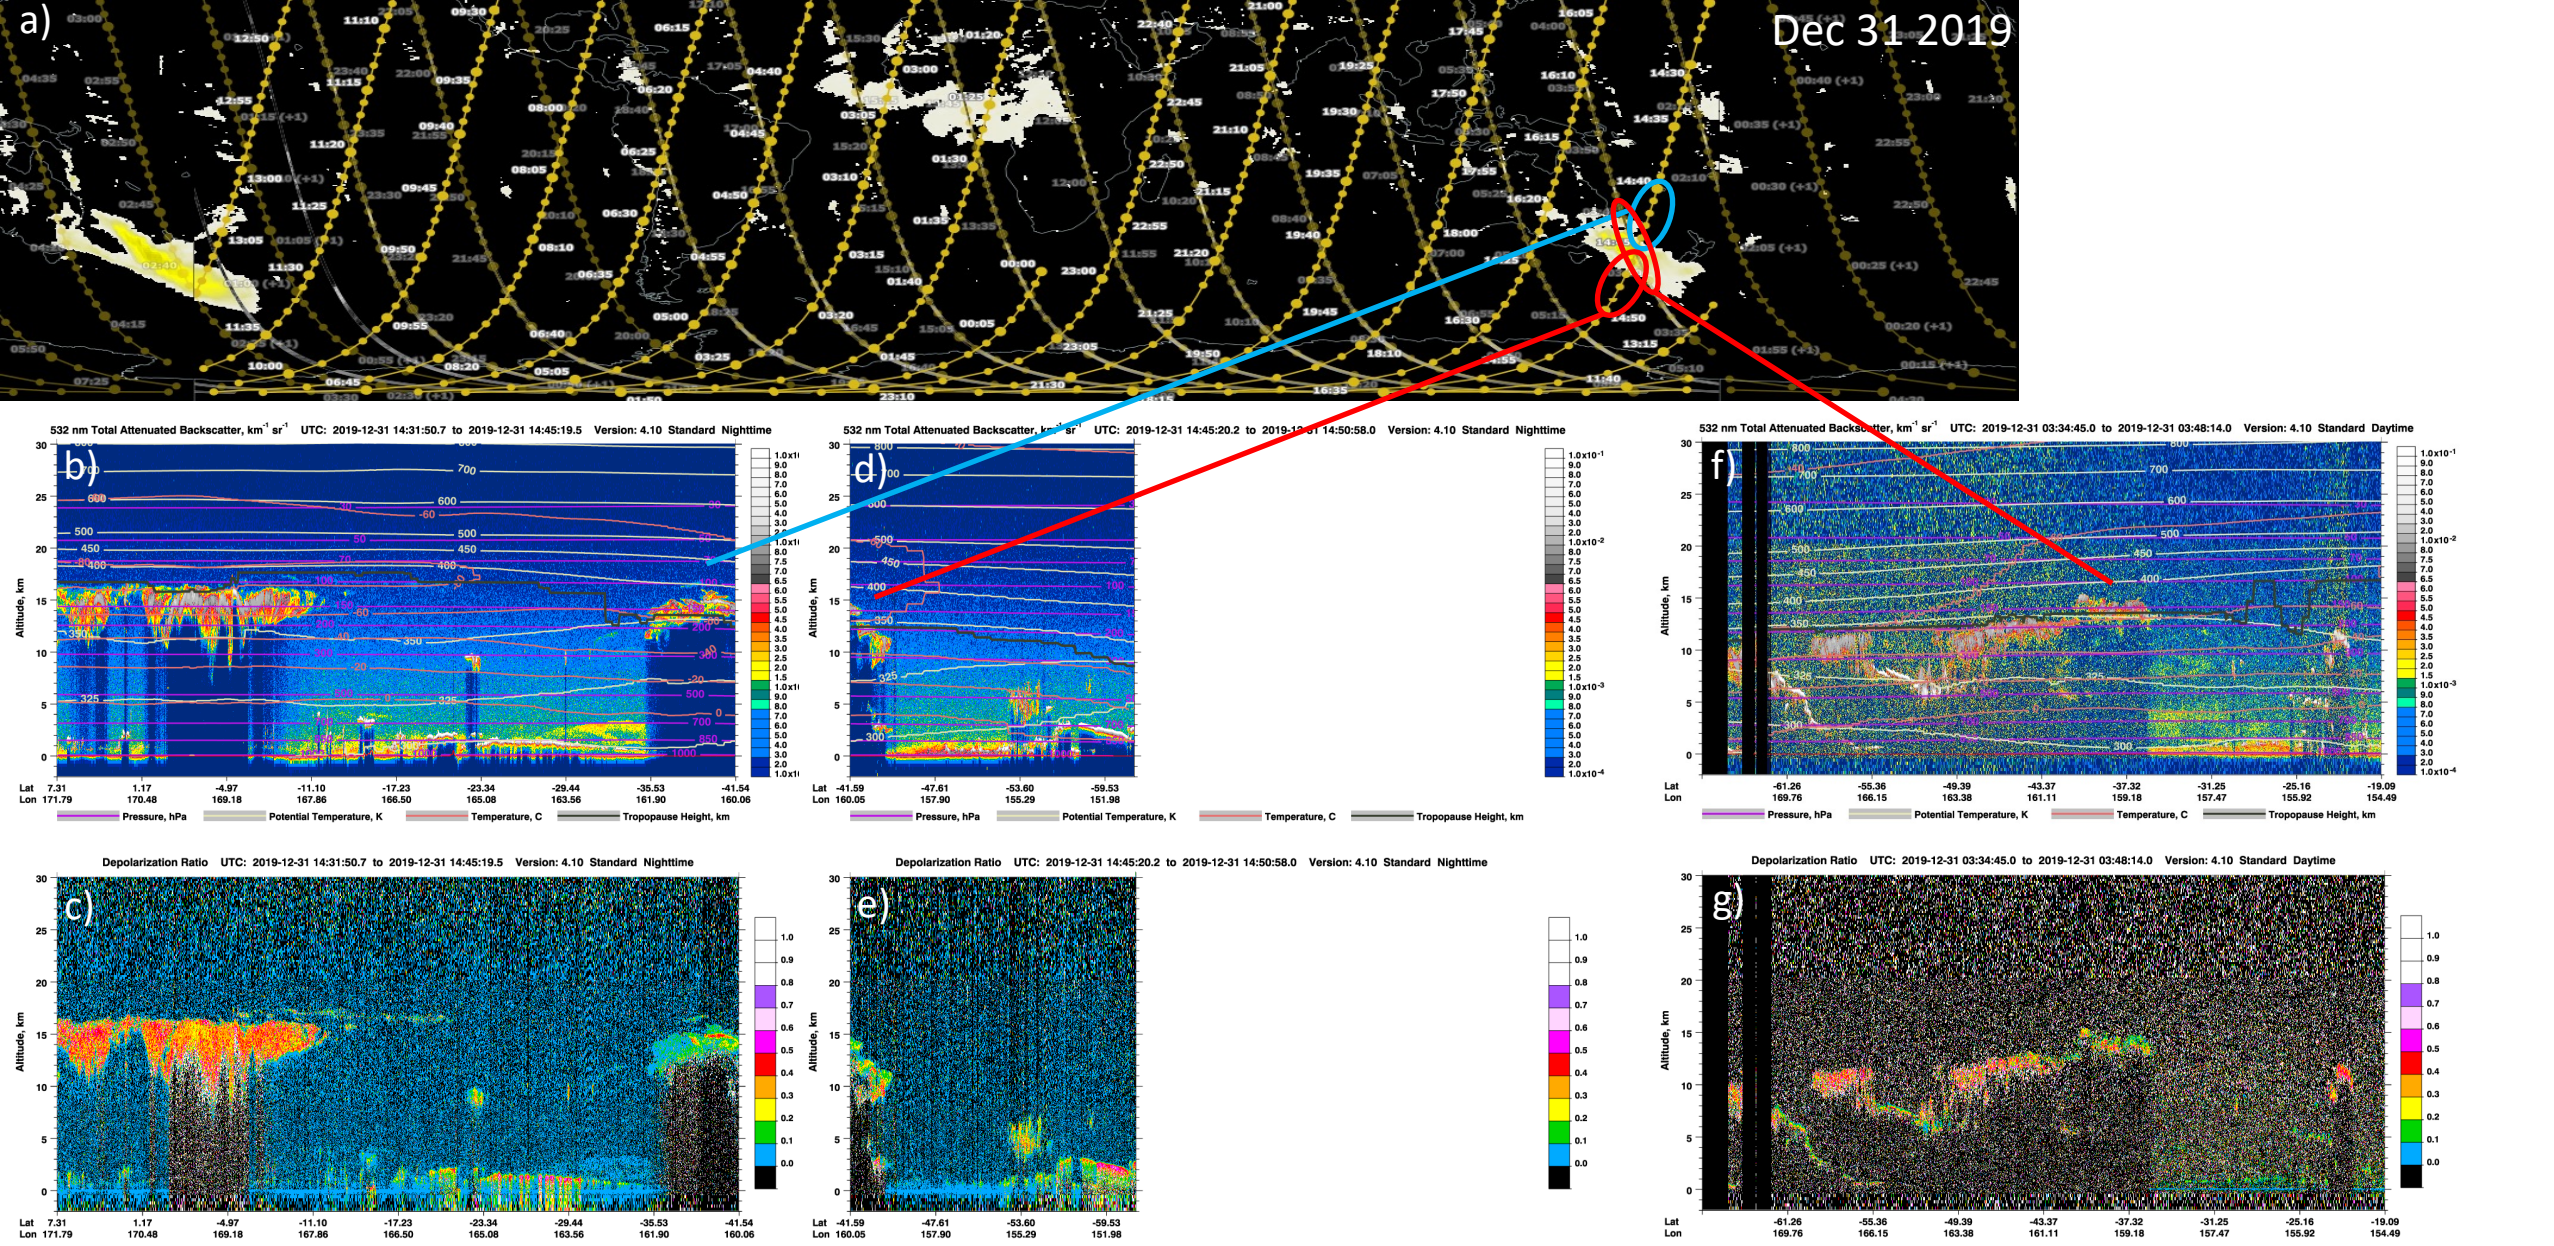

Figure S2. For figure description, see Text S1.

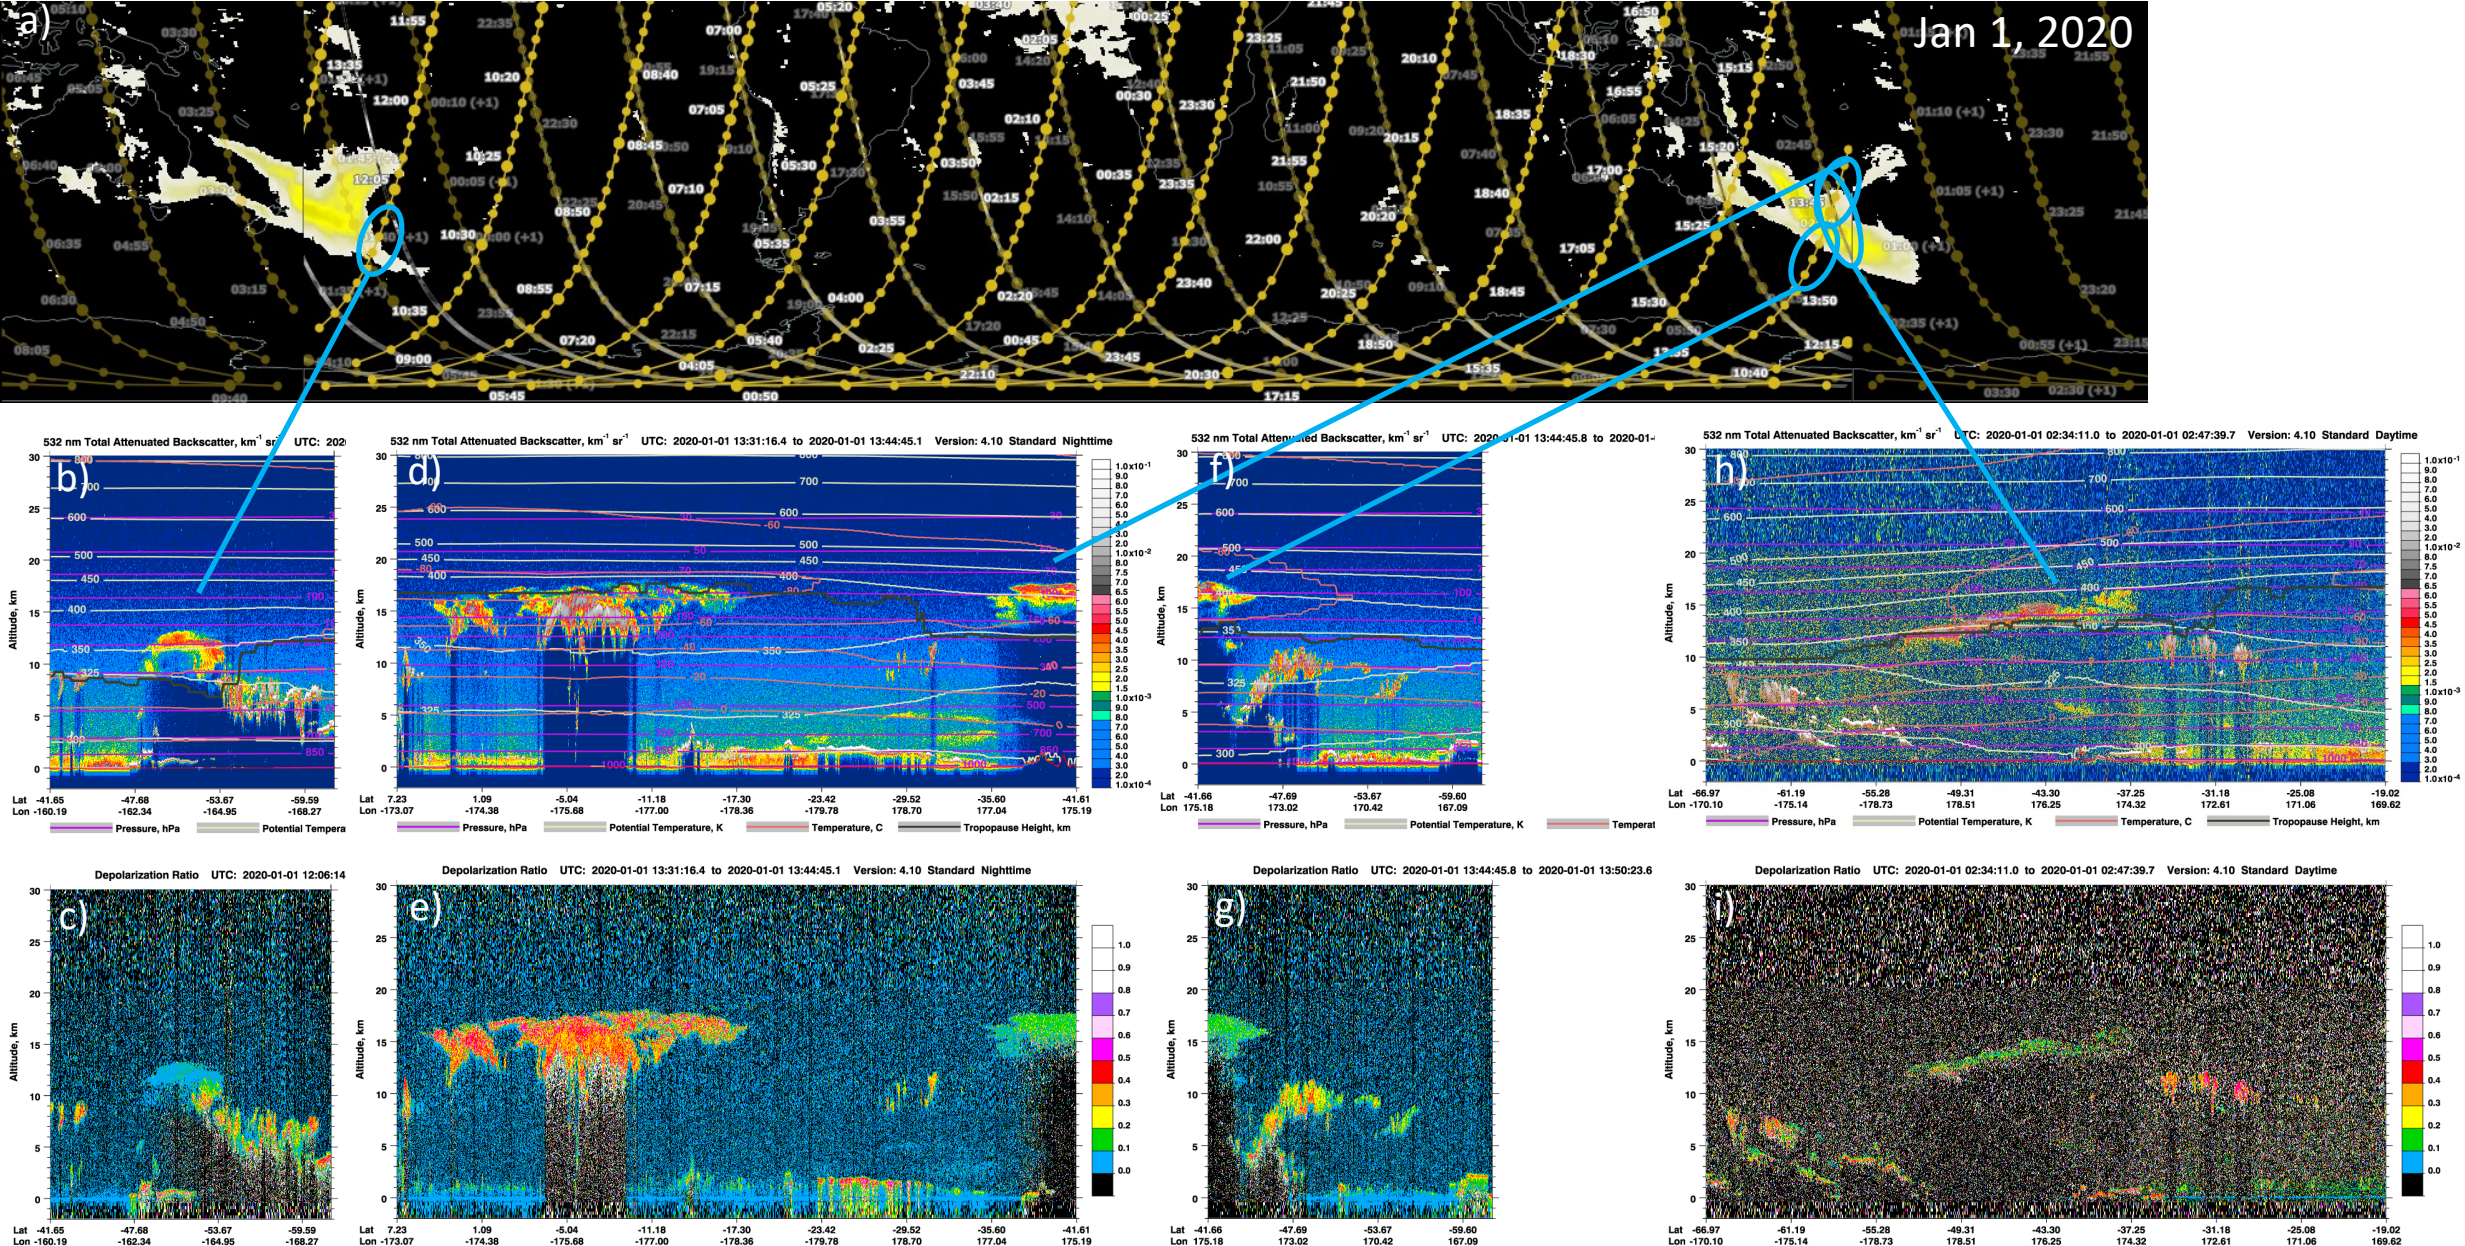

Figure S3 . For figure description, see Text S1.

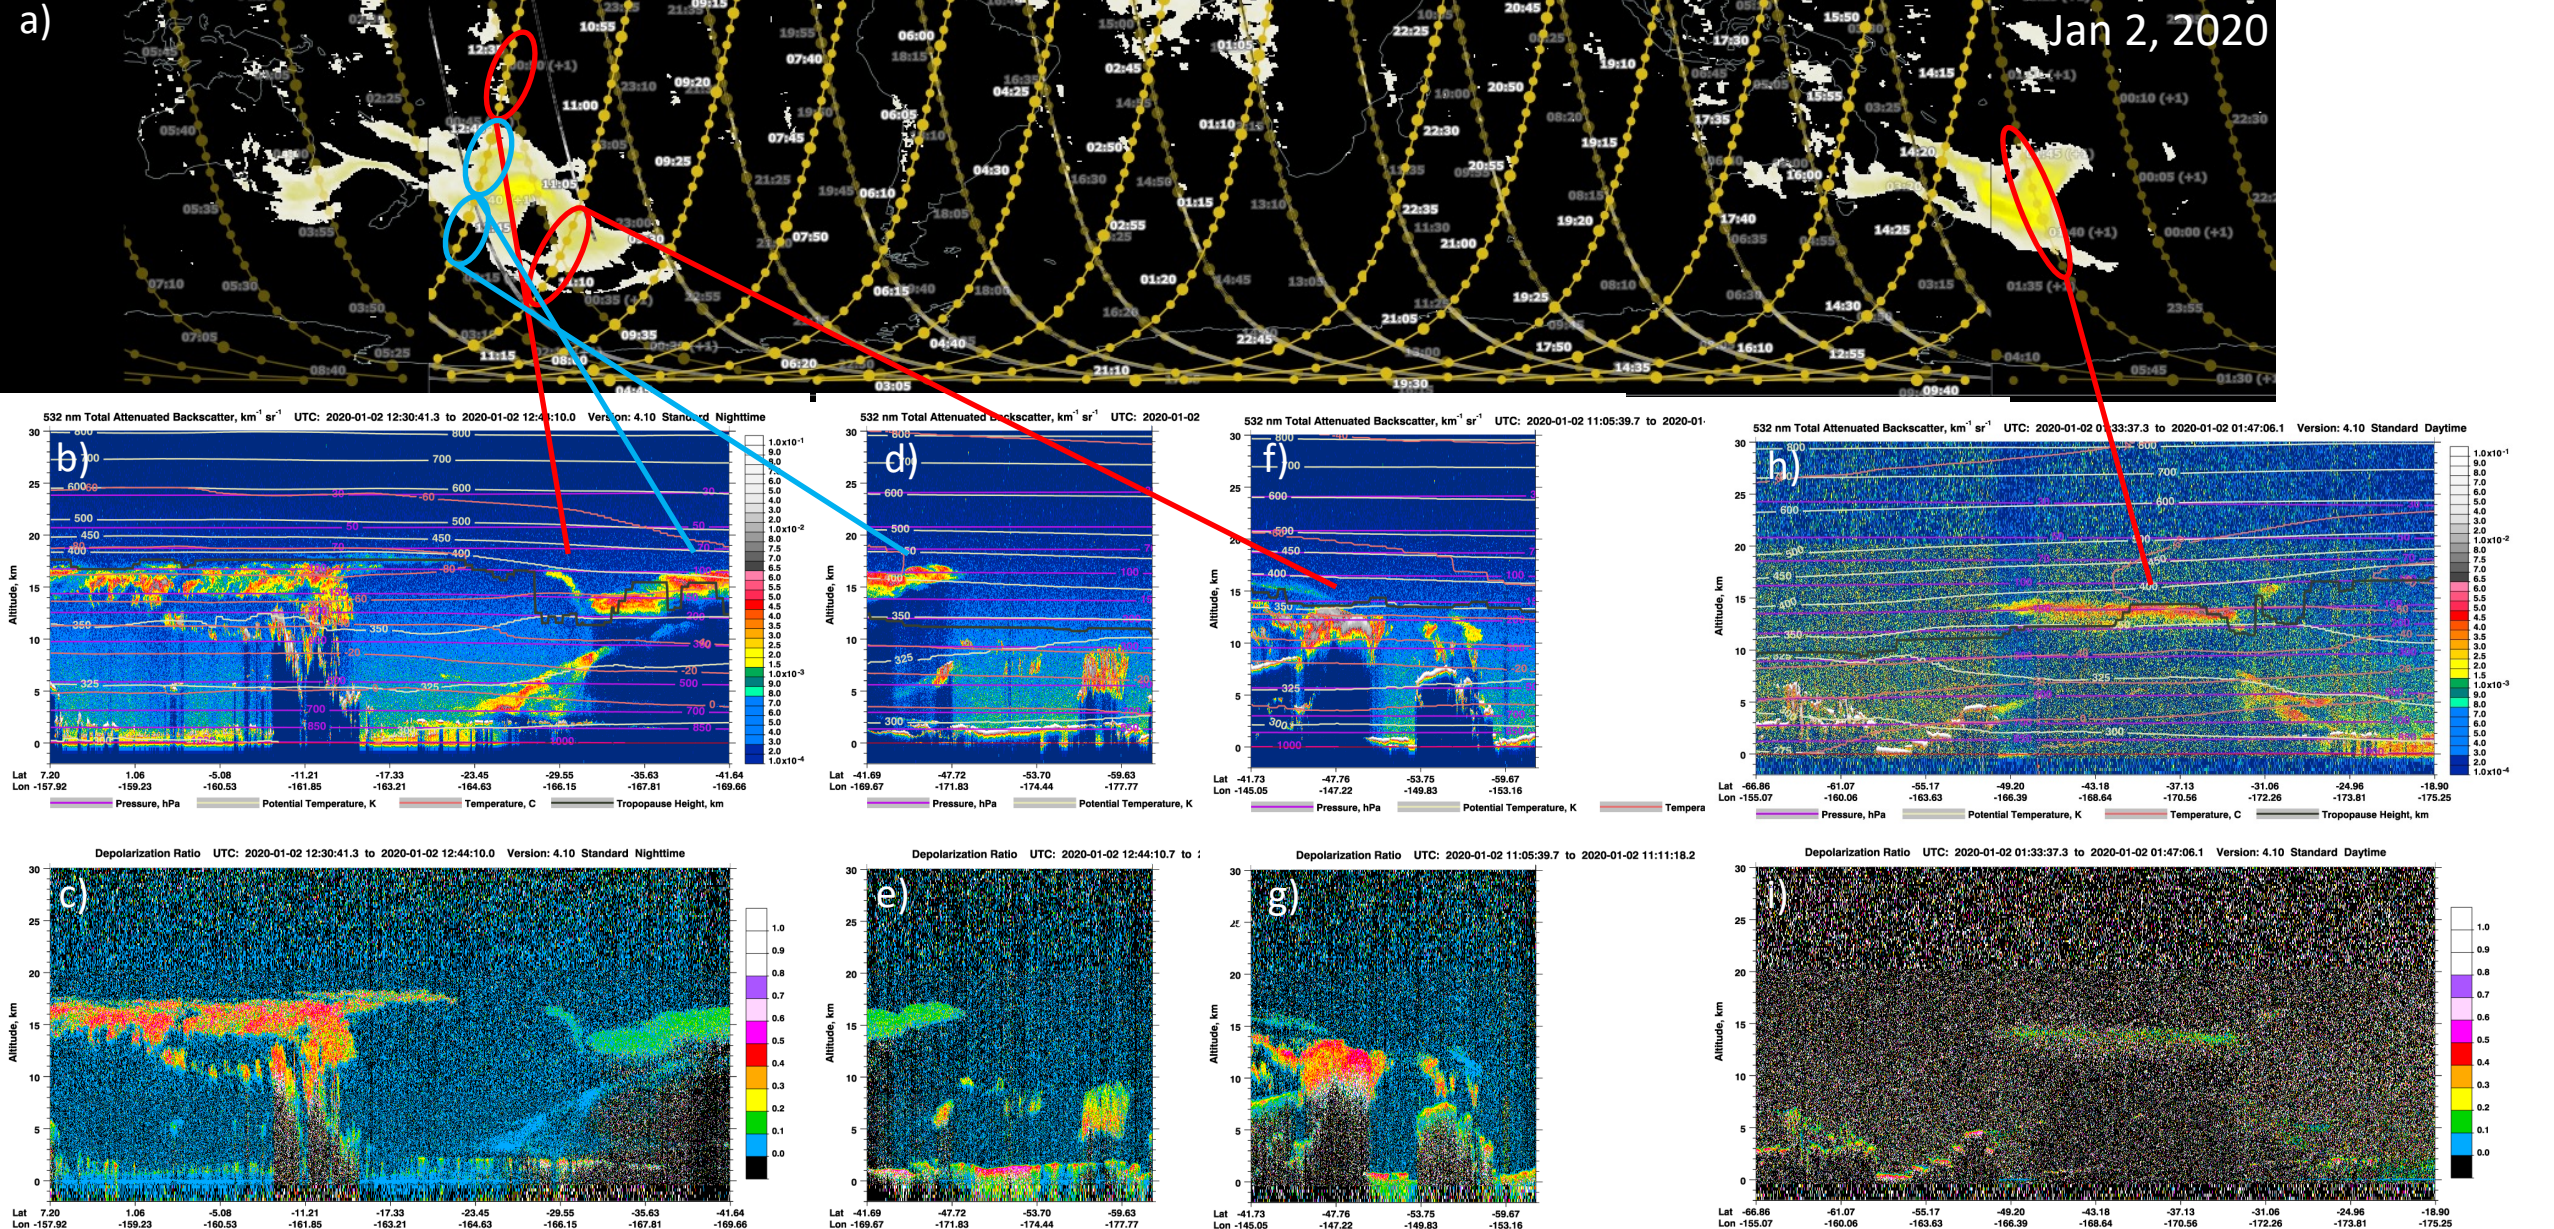

Figure S4. For figure description, see Text S1.

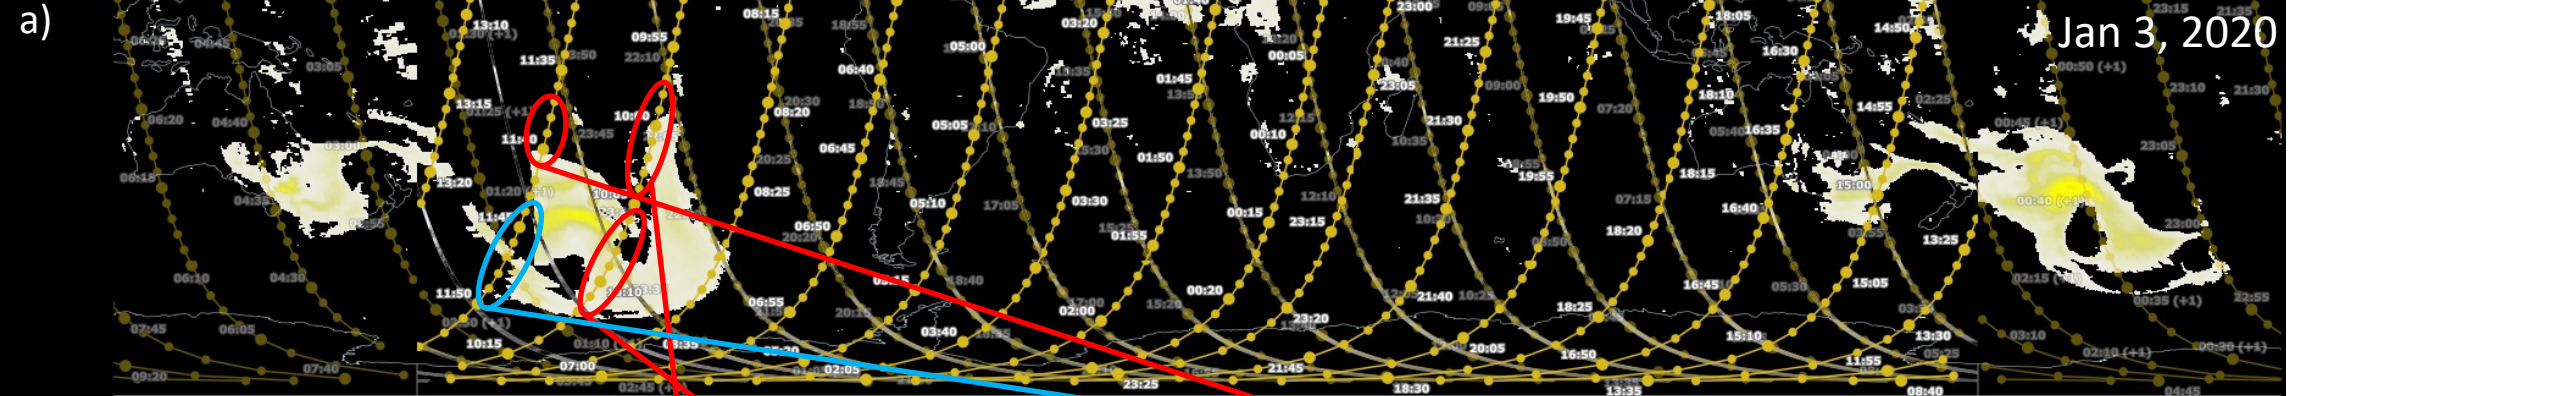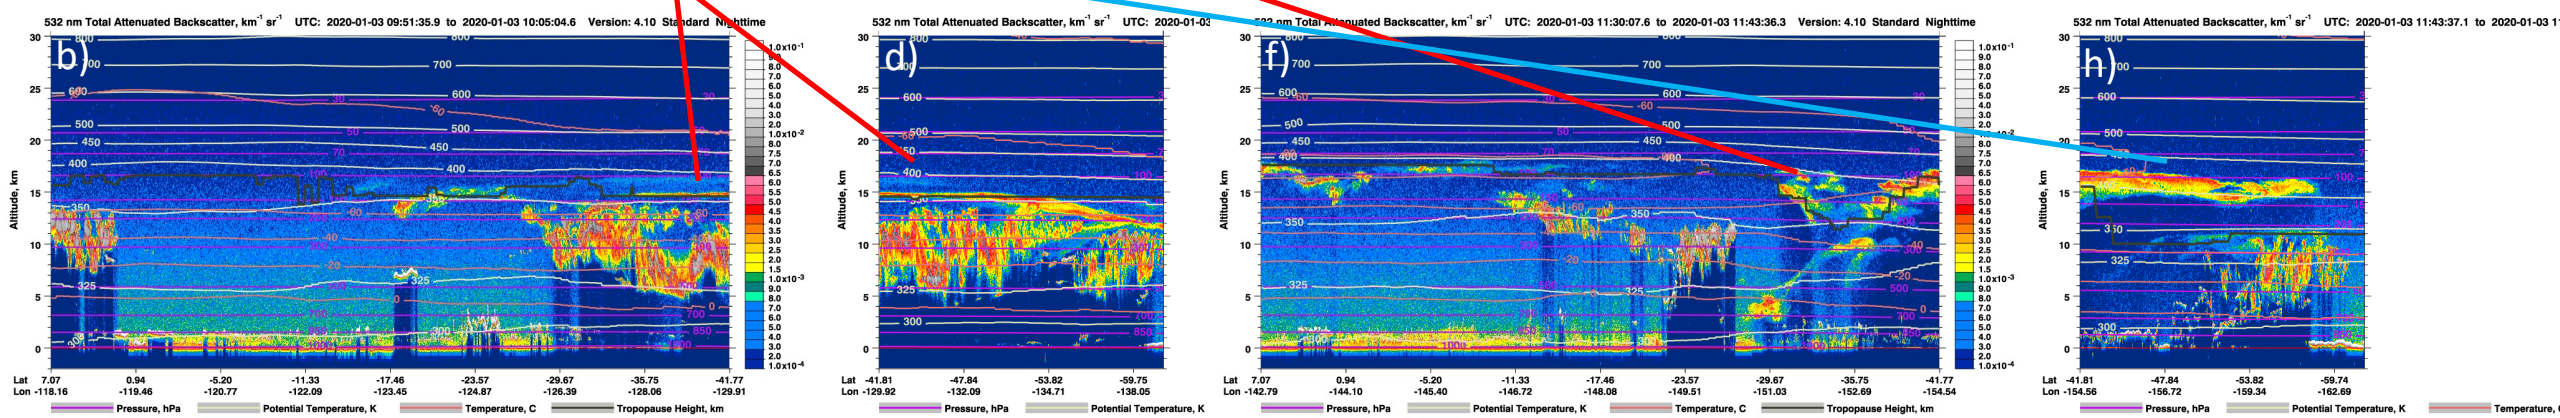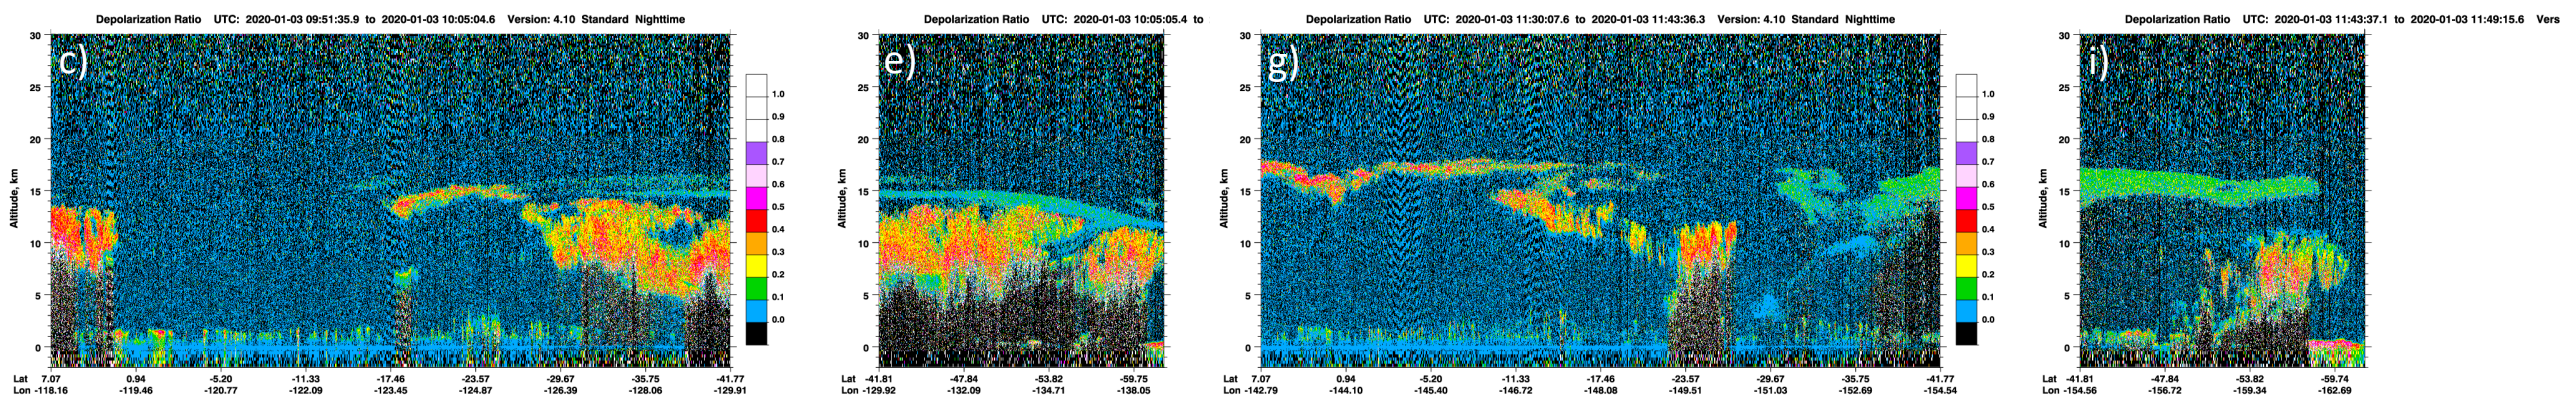

Figure S5 . For figure description, see Text S1.



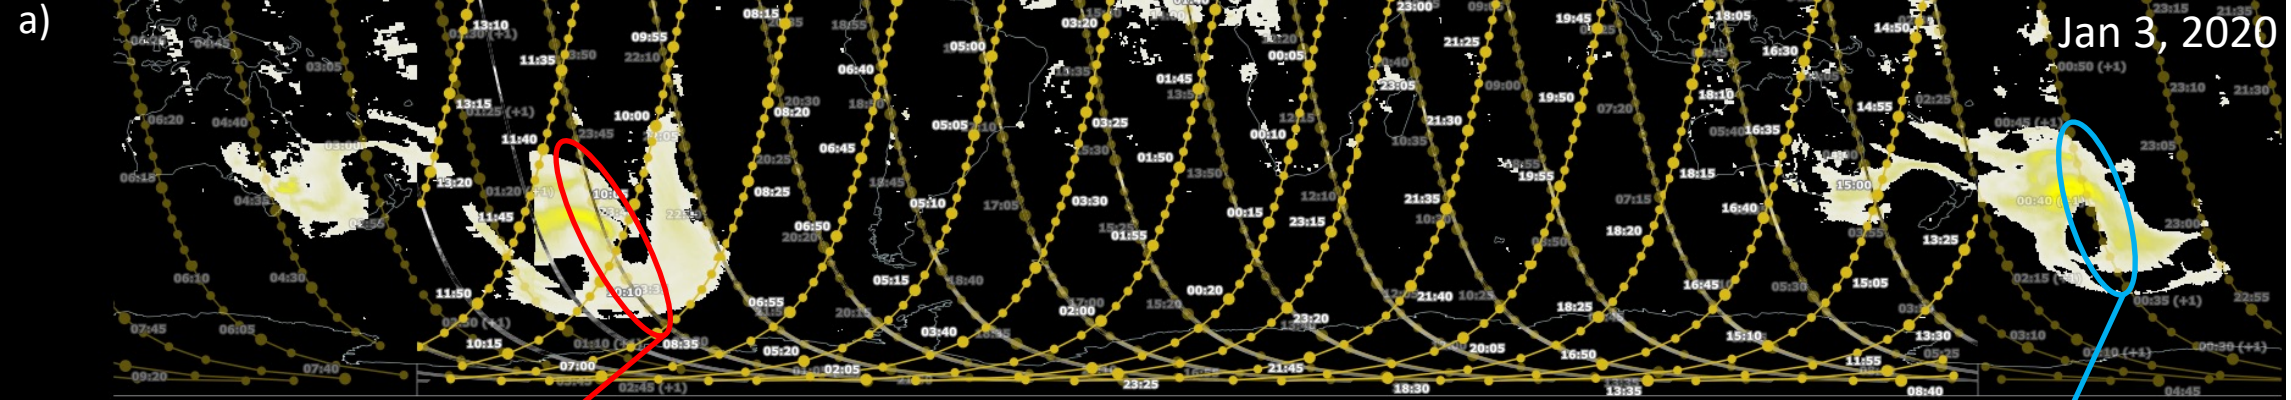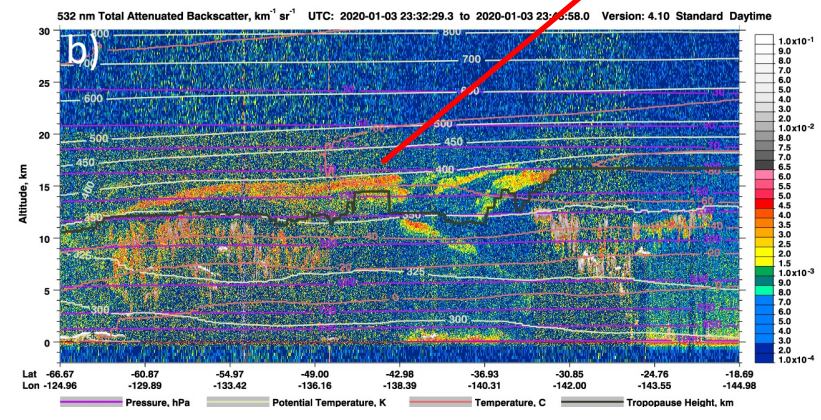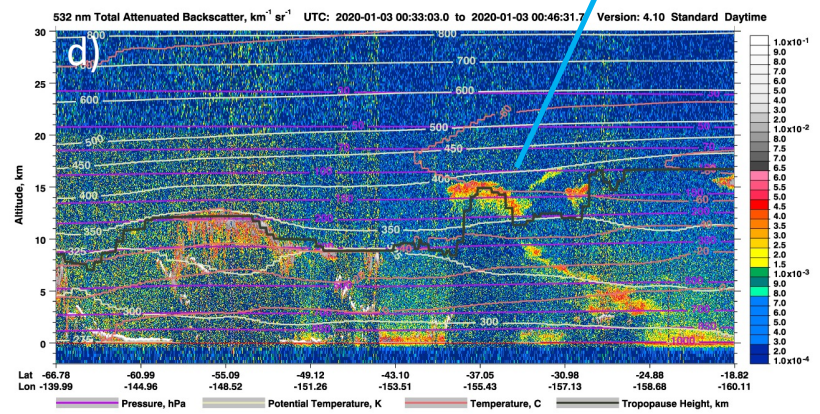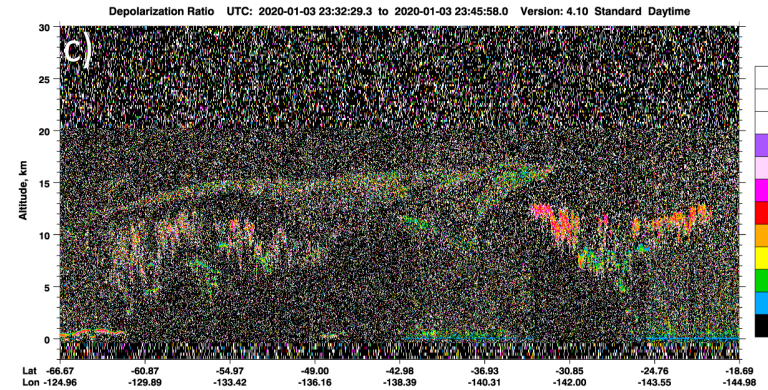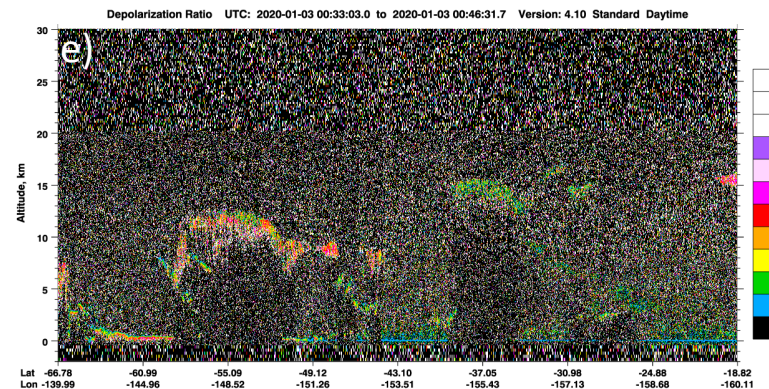

Figure S6. For figure description, see Text S1.

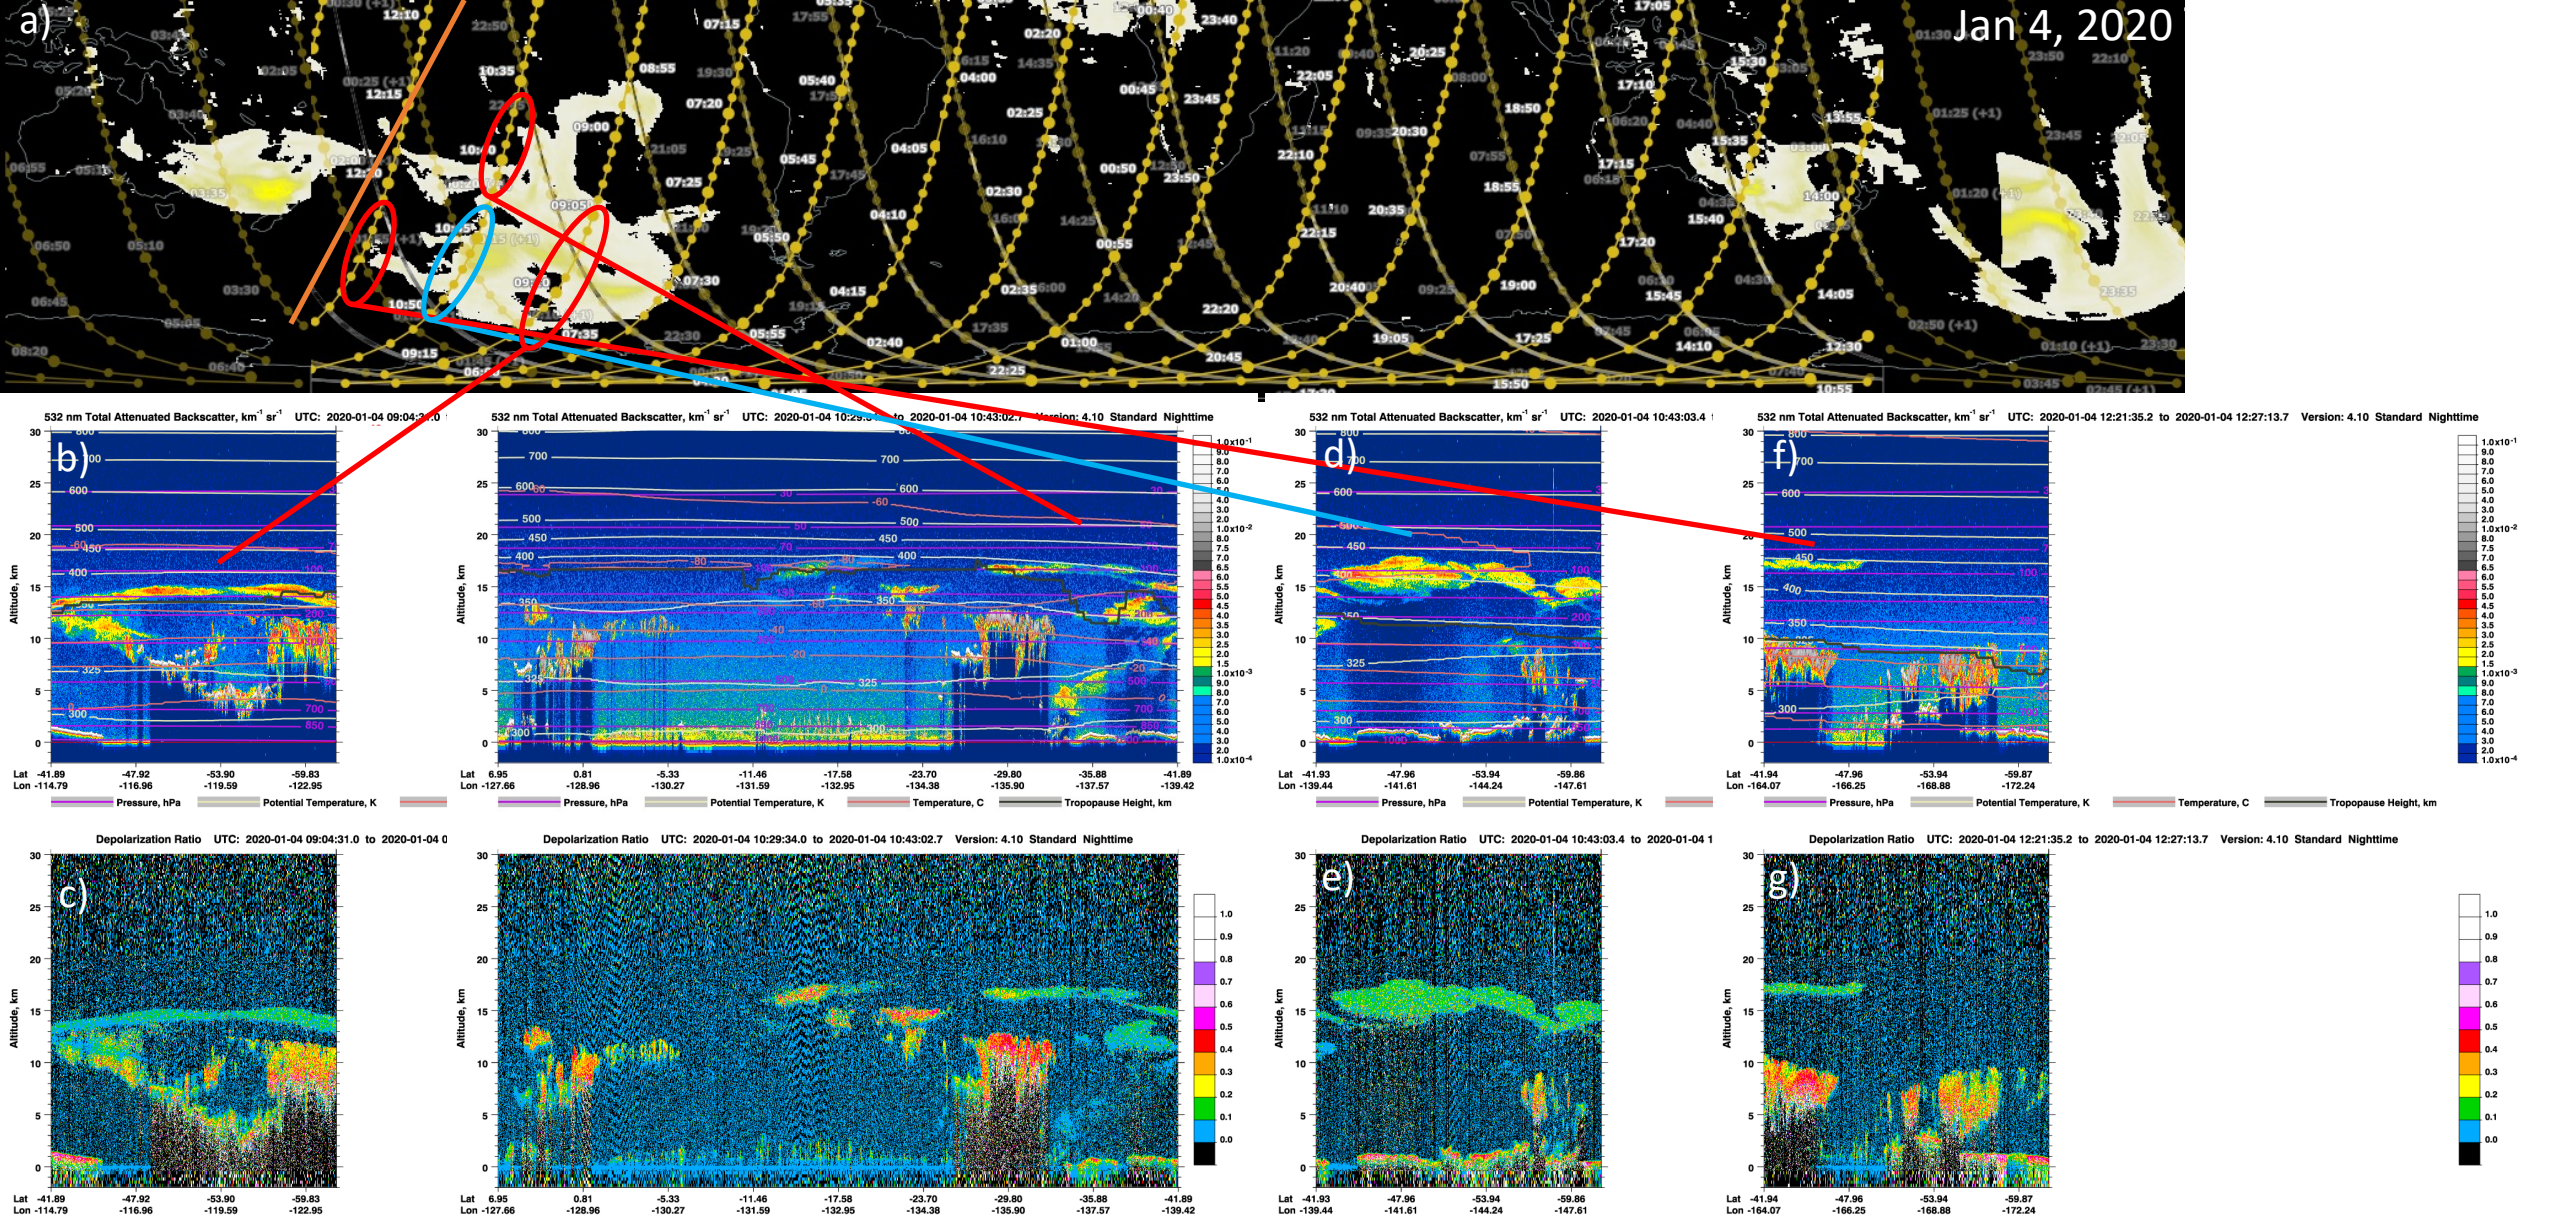

Figure S7. For figure description, see Text S1.

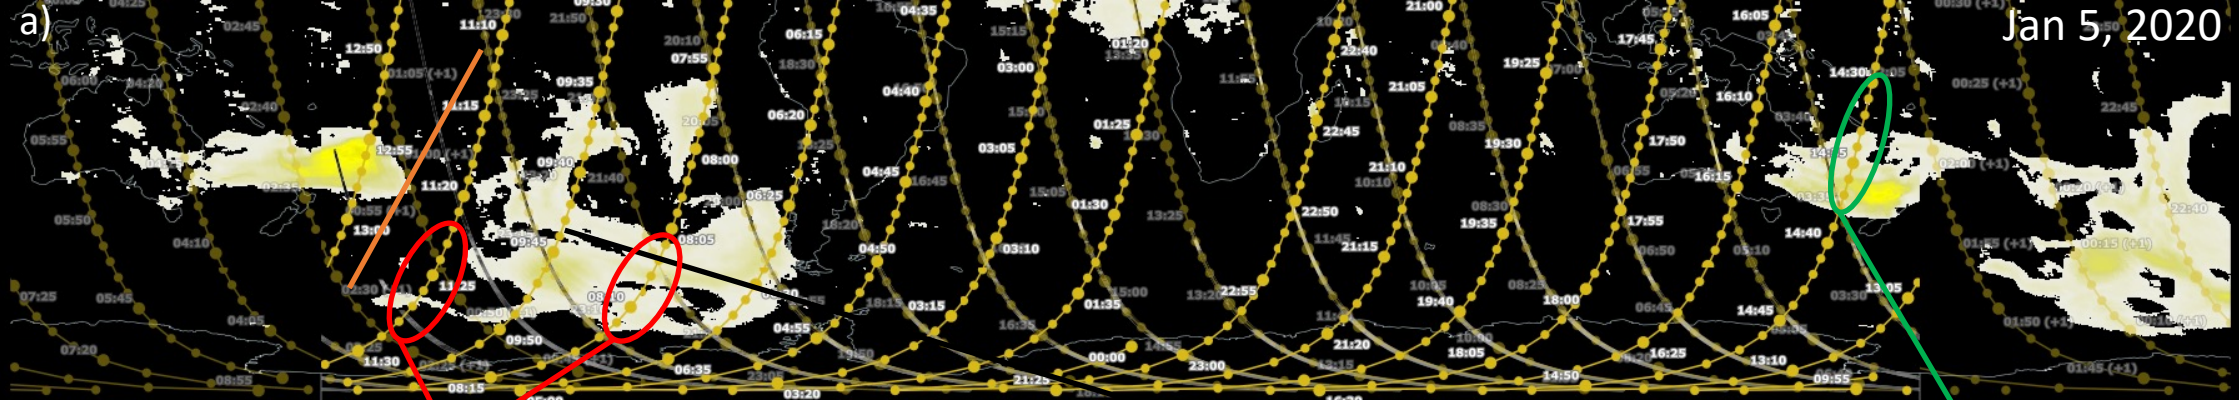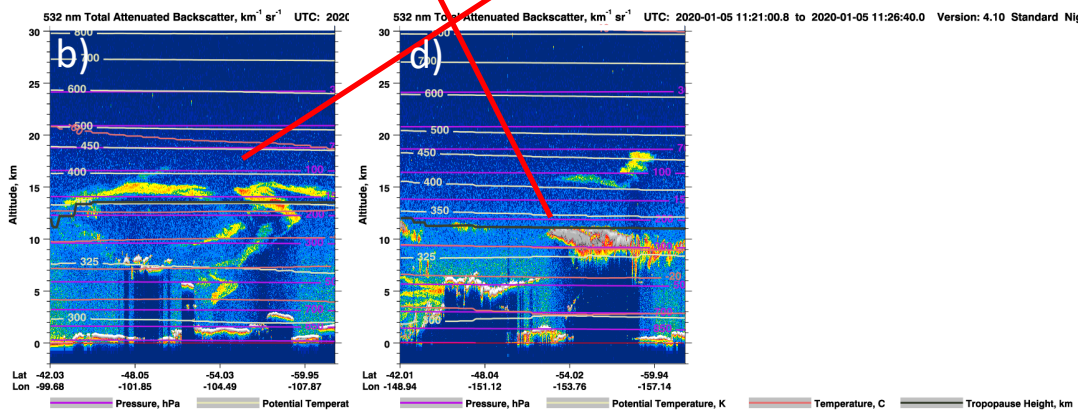

Calipso data missing from this swath

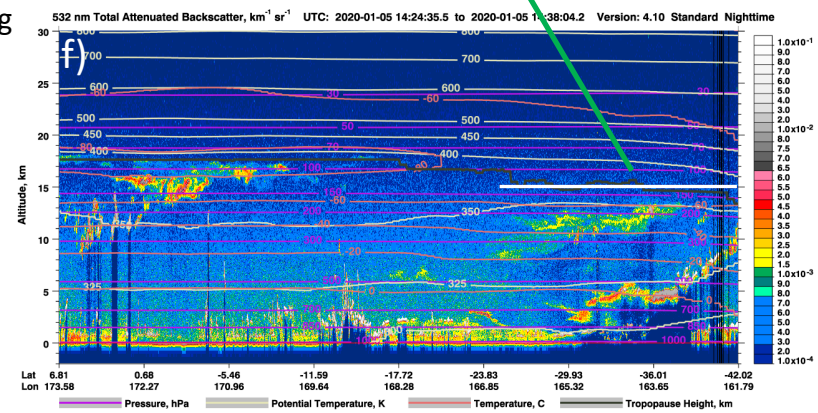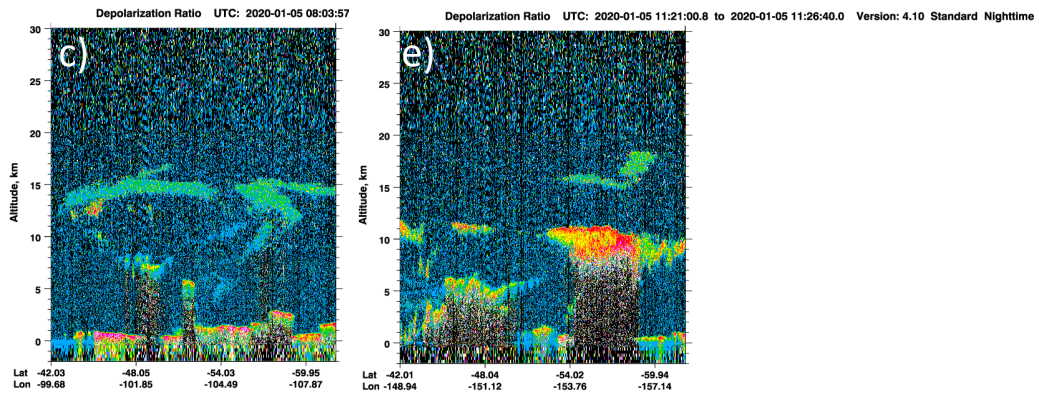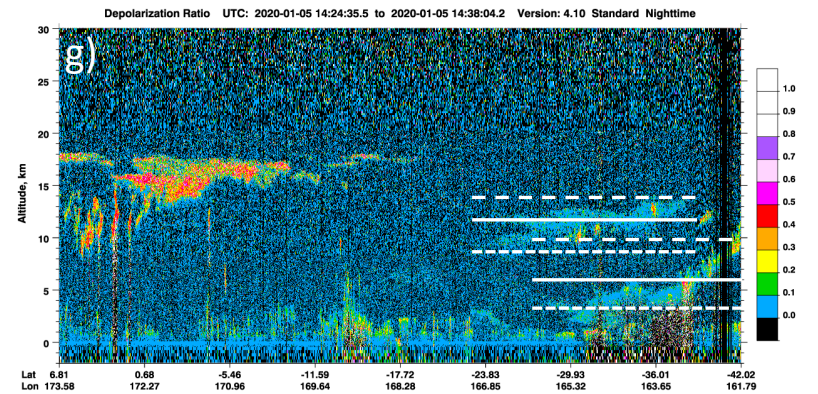

Figure S8. For figure description, see Text S1.

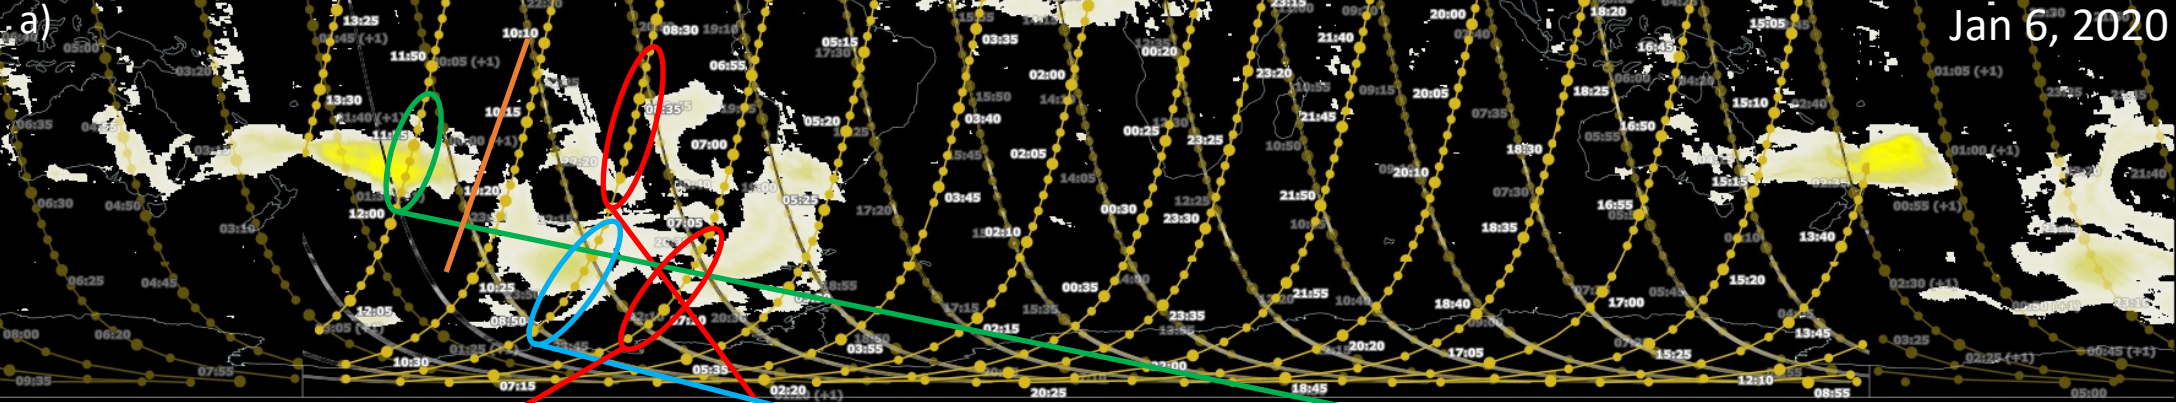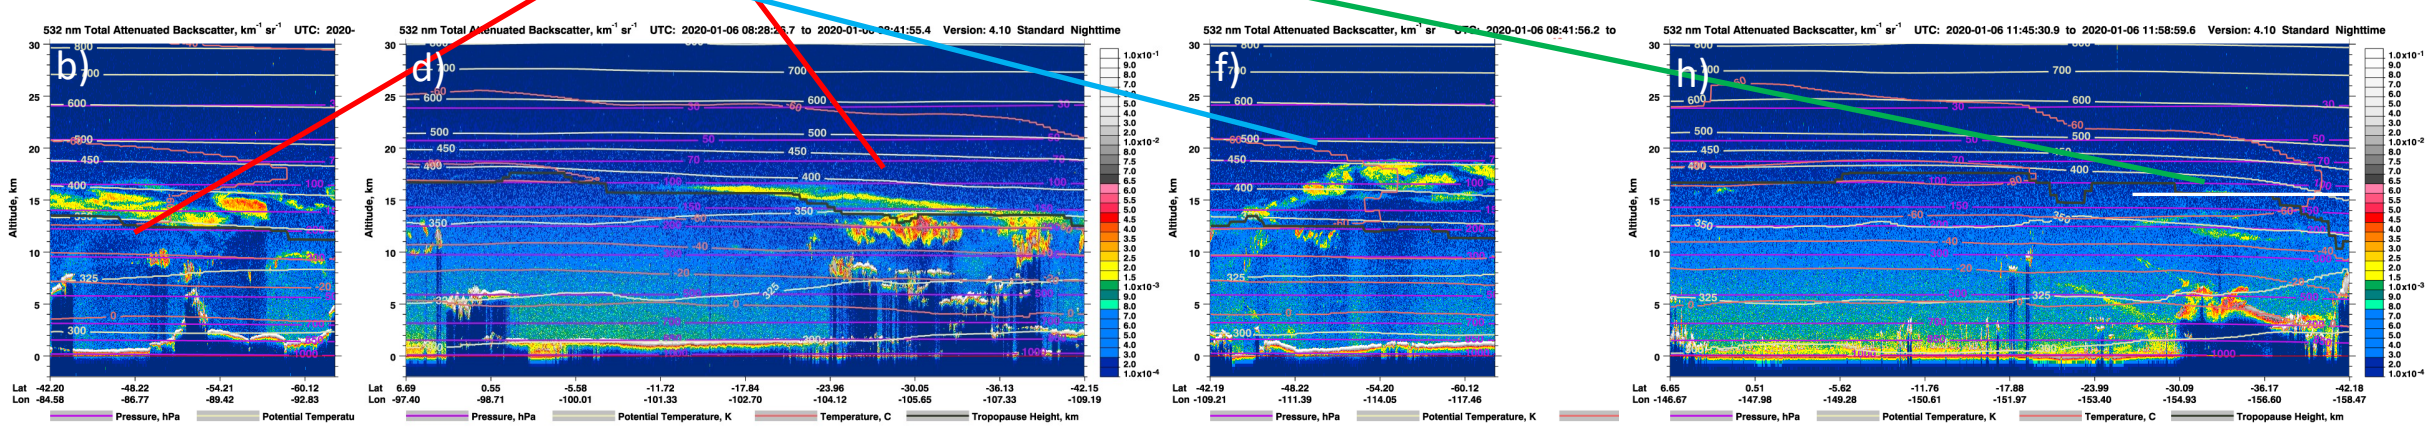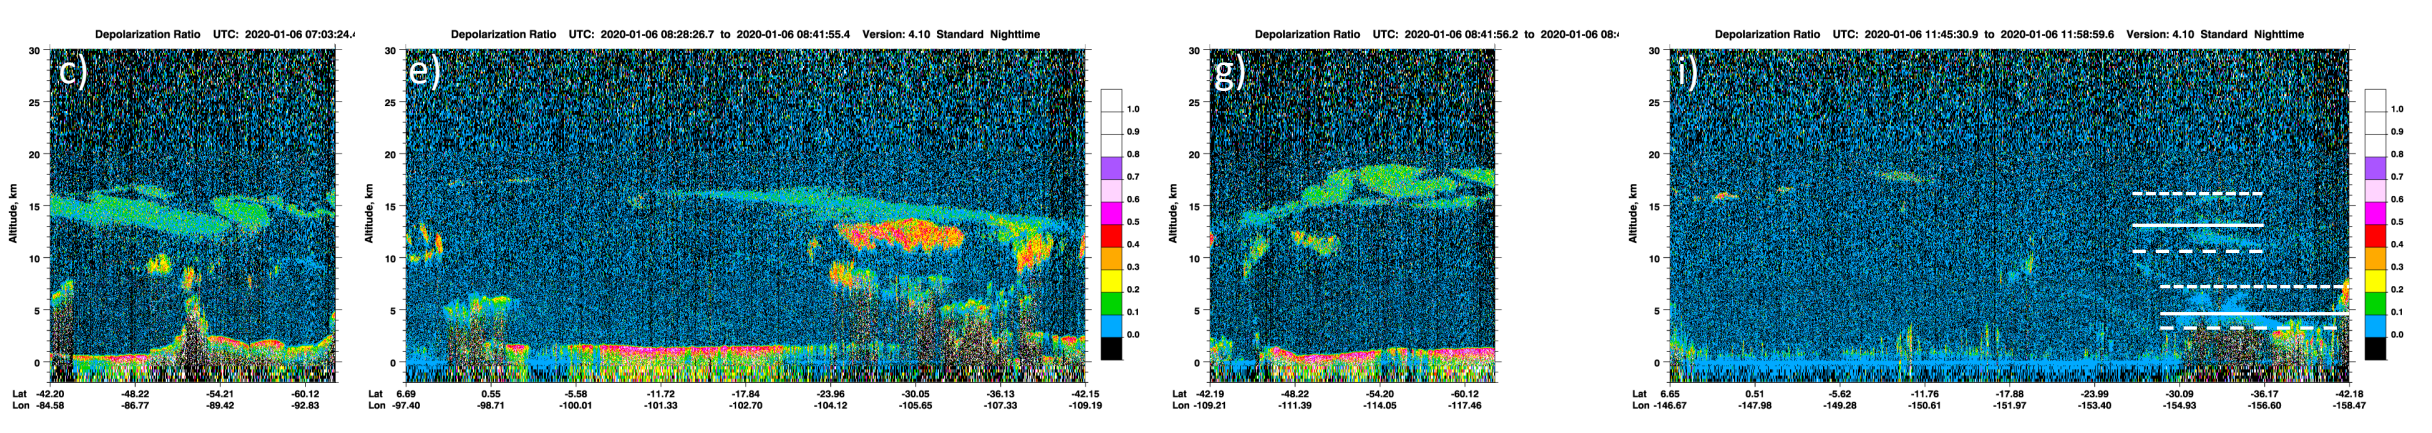

Figure S9. For figure description, see Text S1.

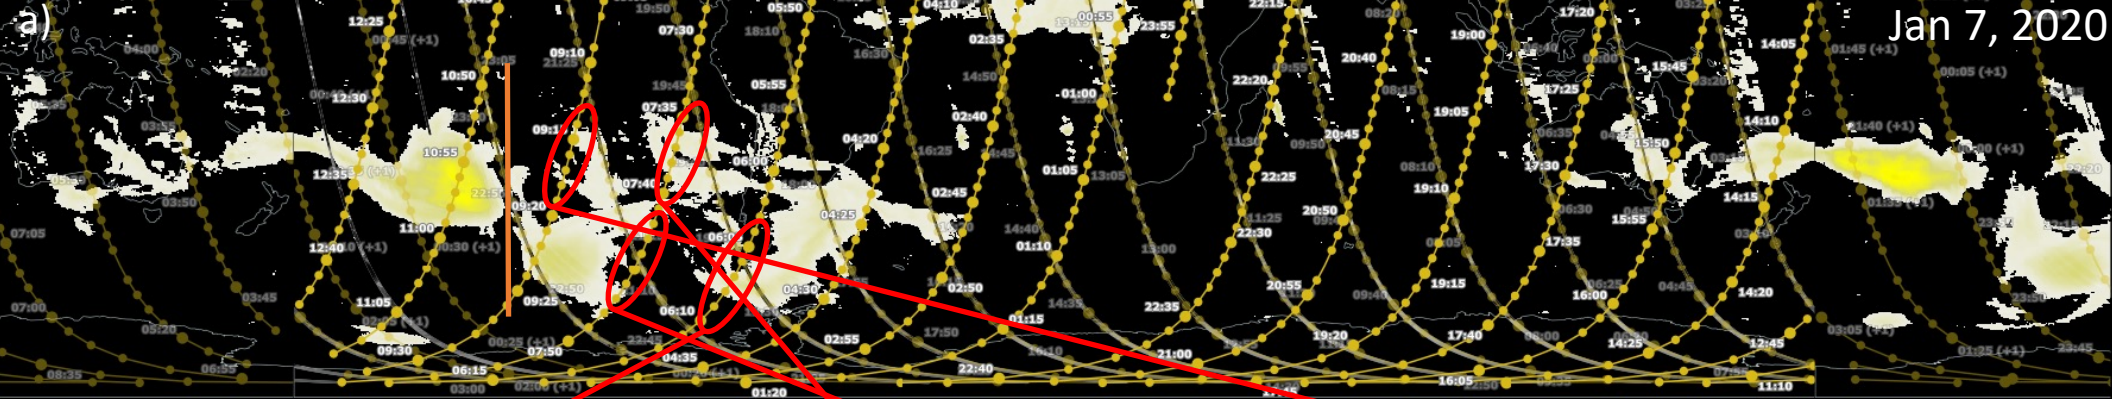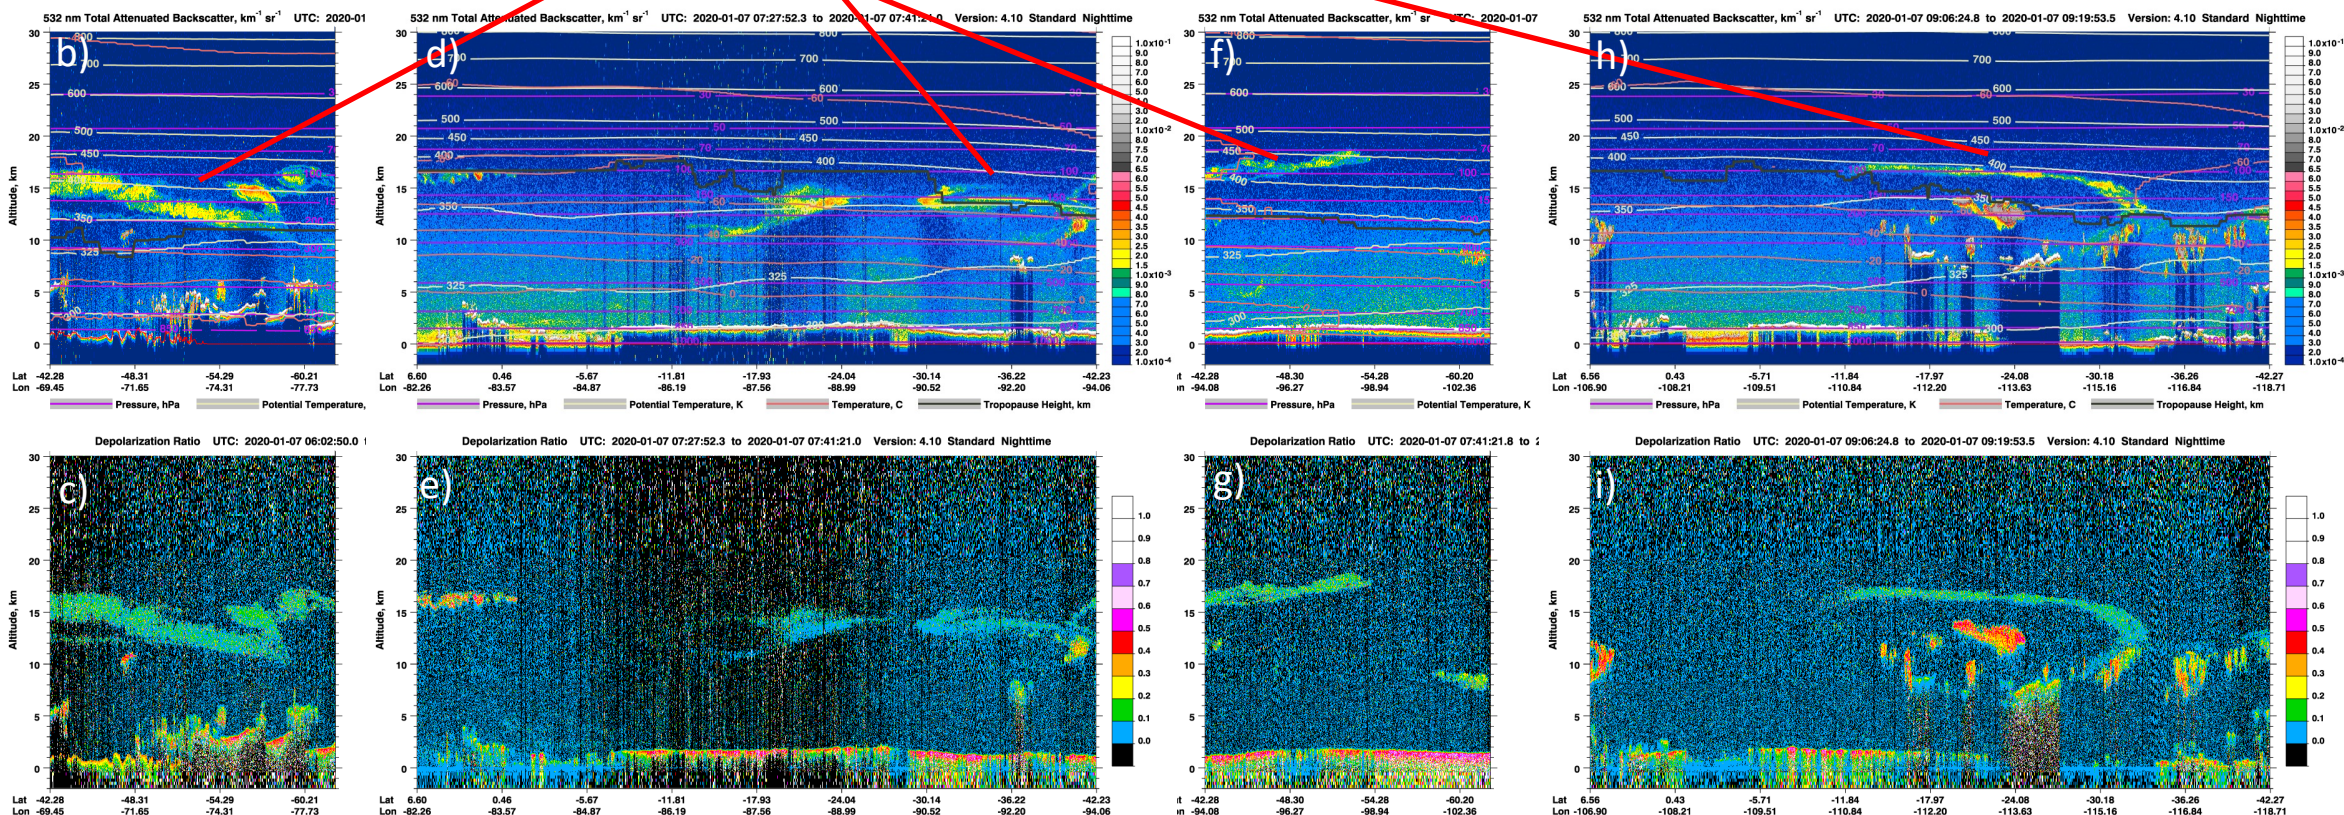

Figure S10. For figure description, see Text S1.

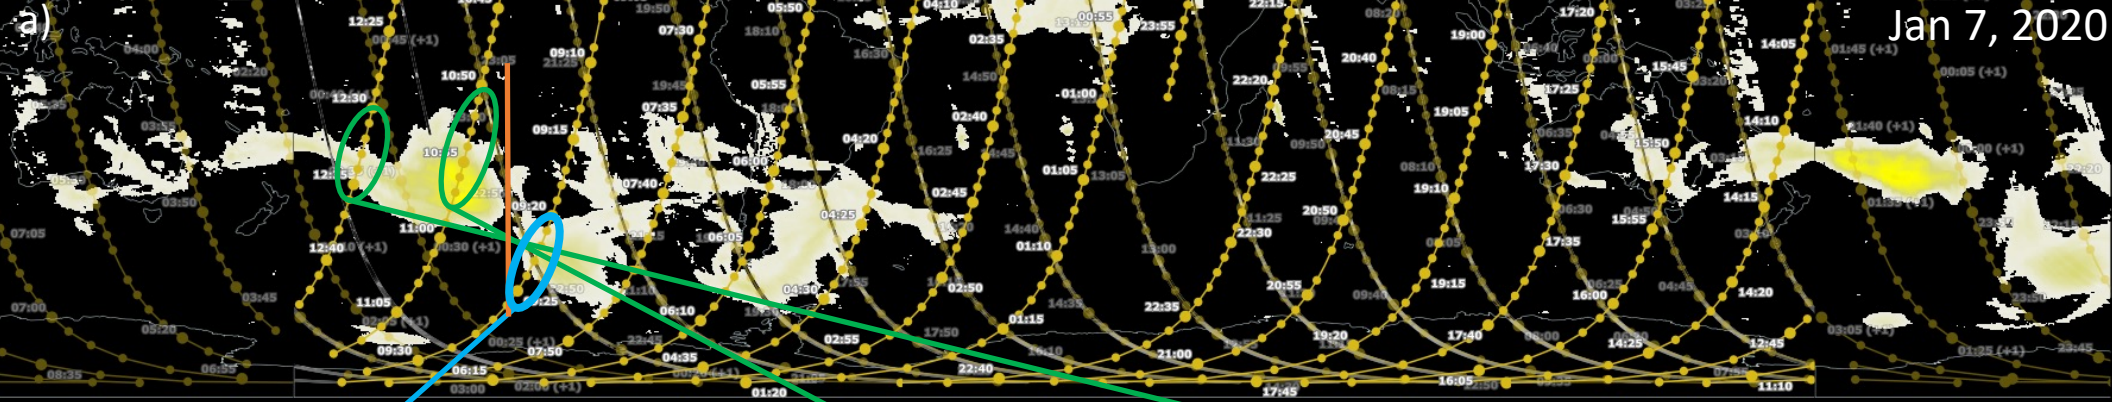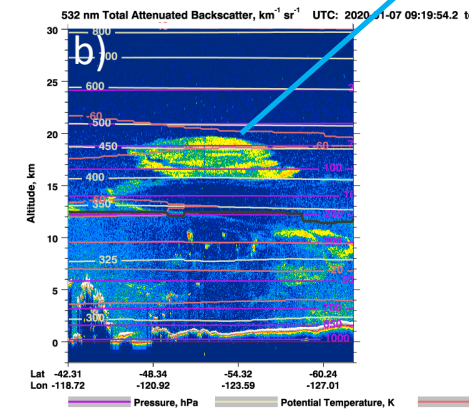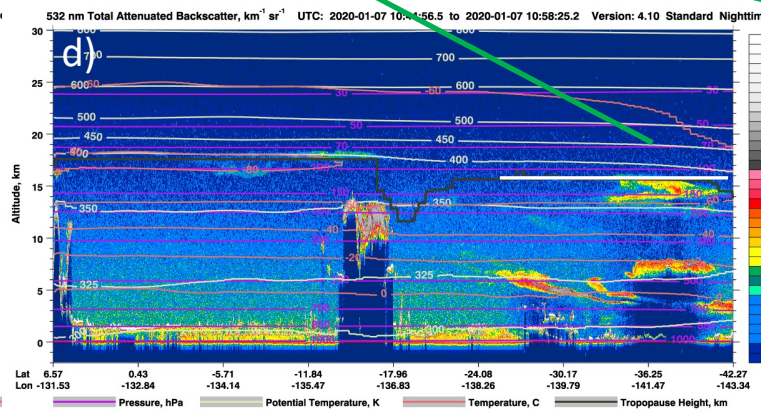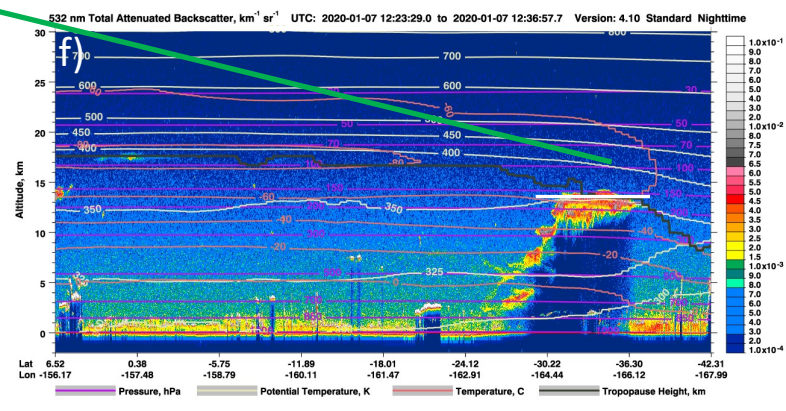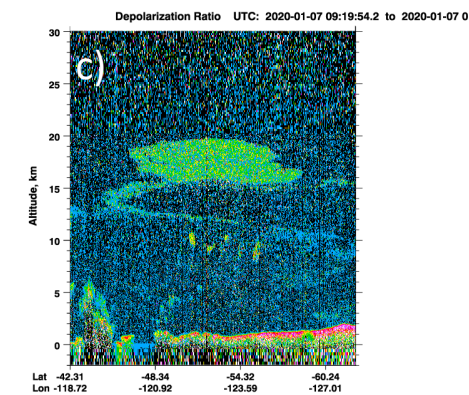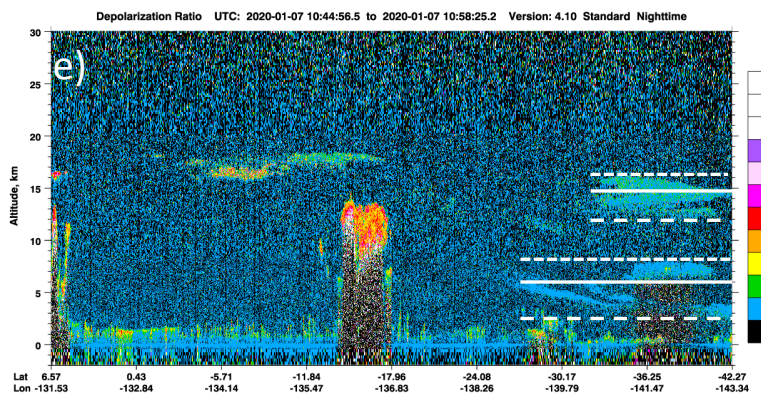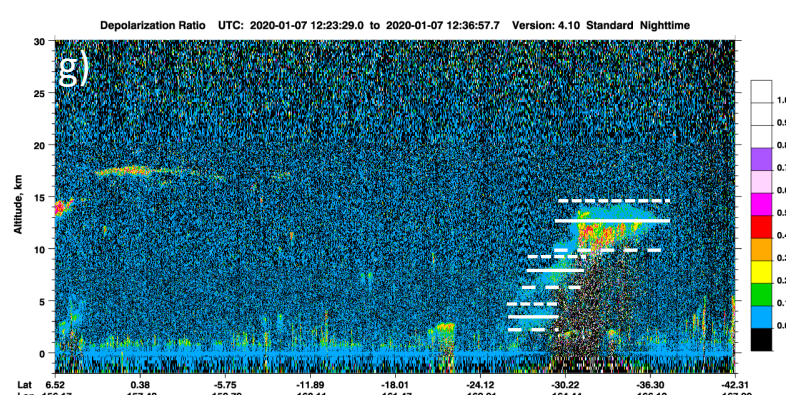

Figure S11. For figure description, see Text S1.

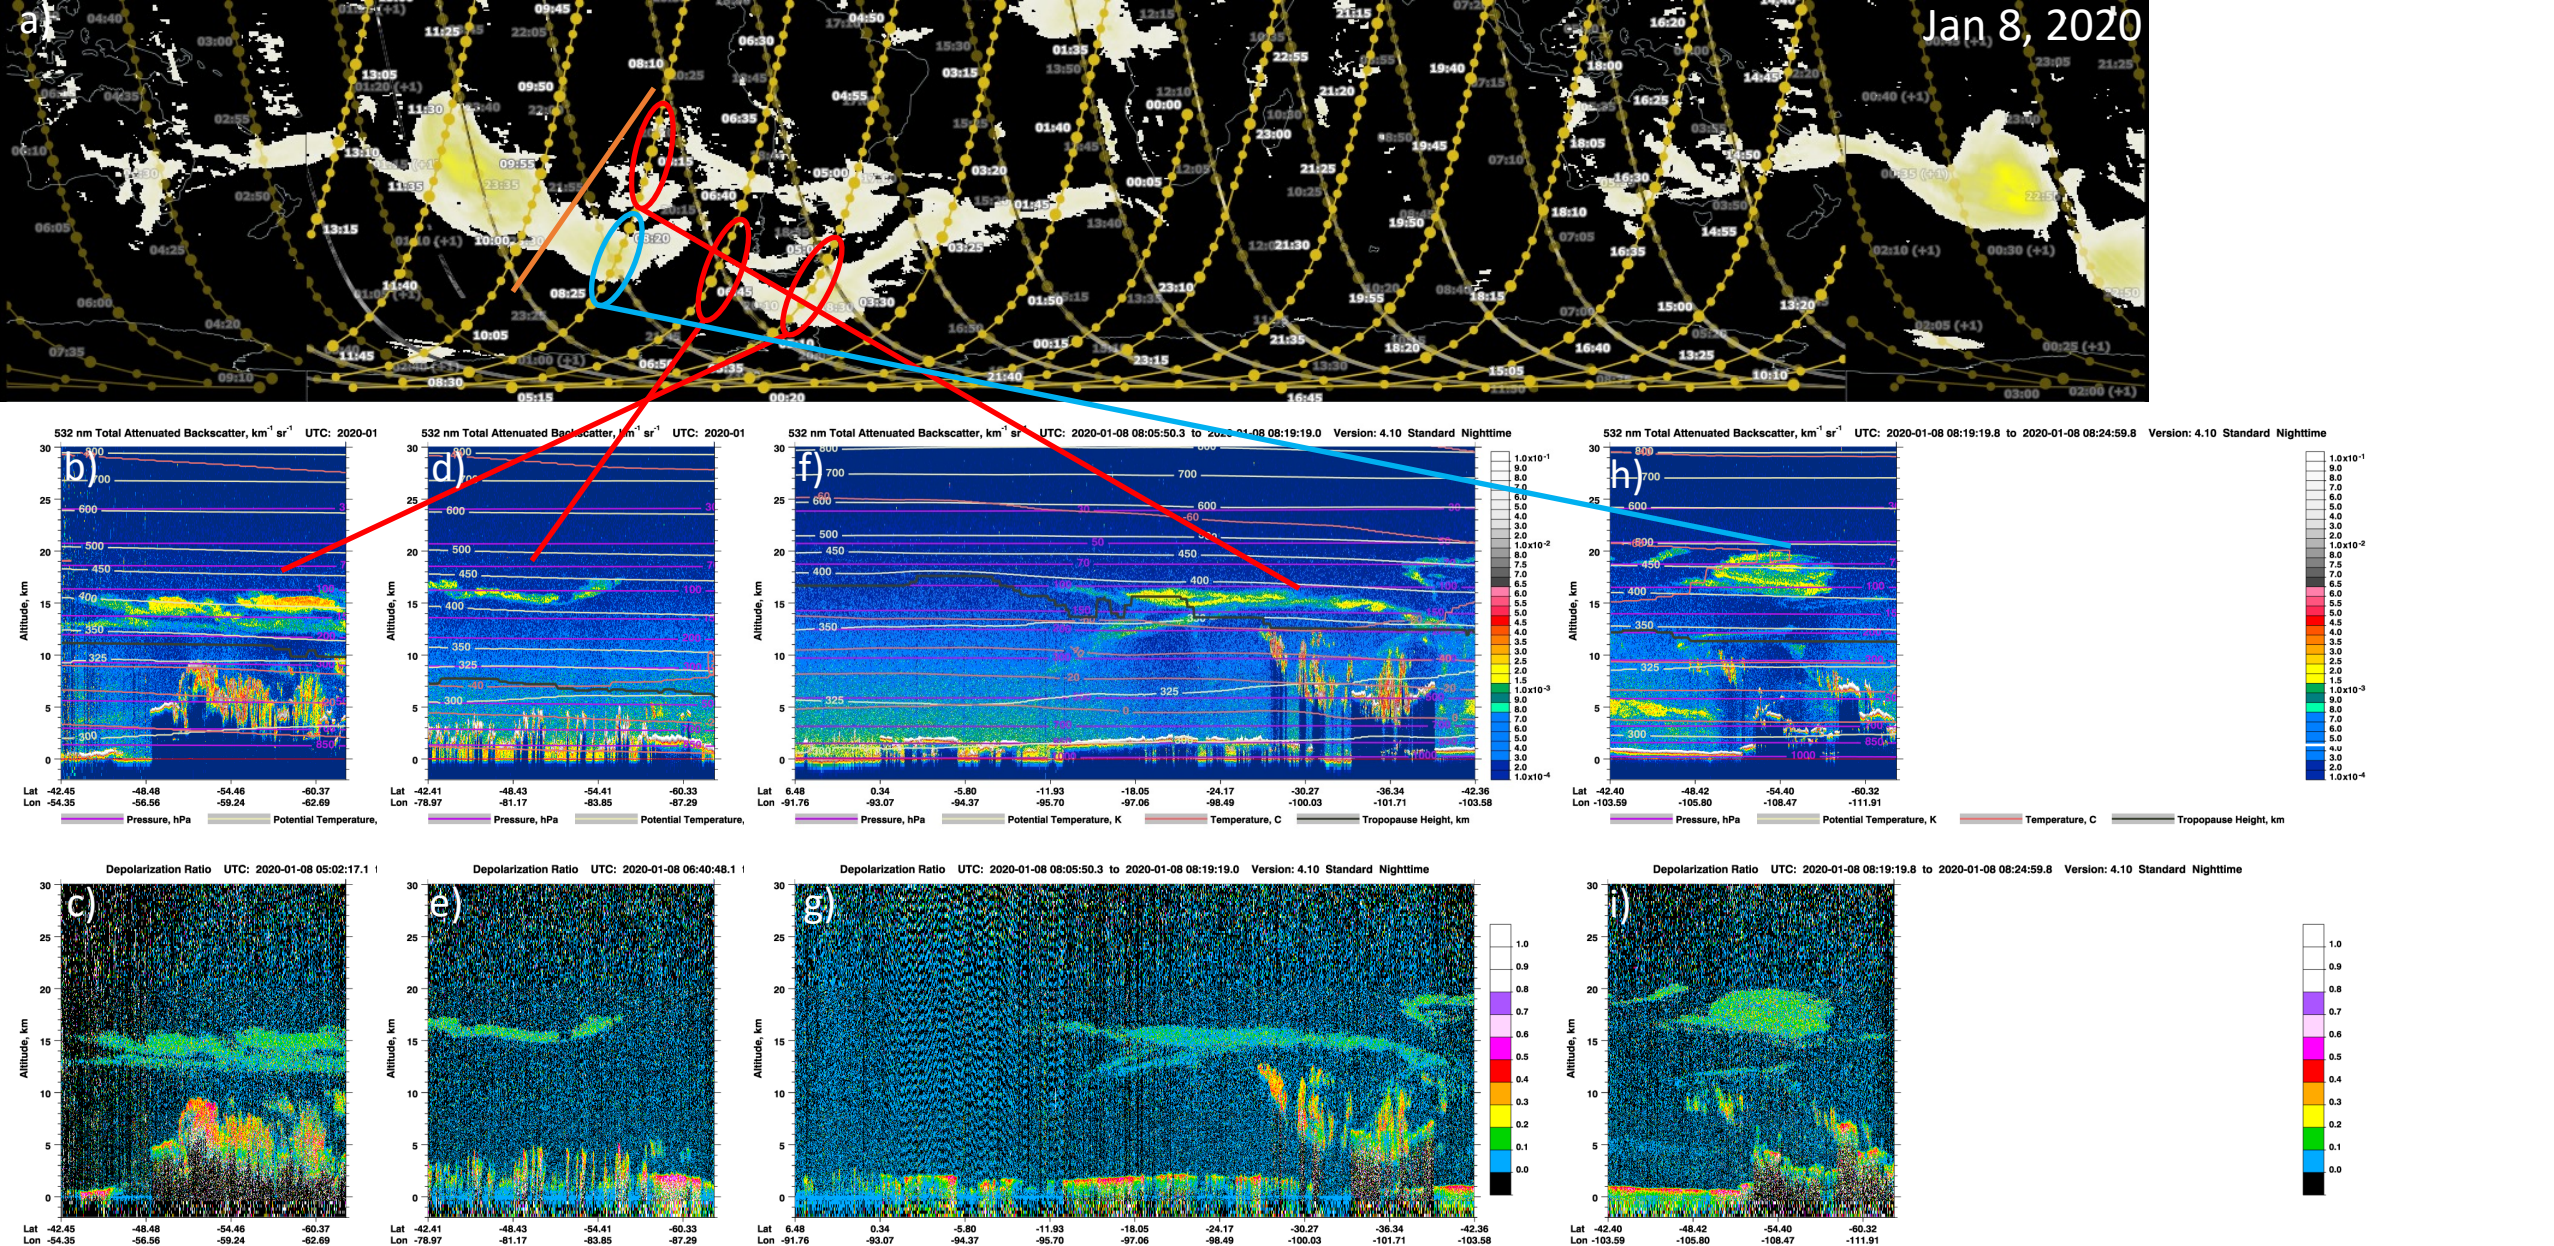

Figure S12. For figure description, see Text S1.

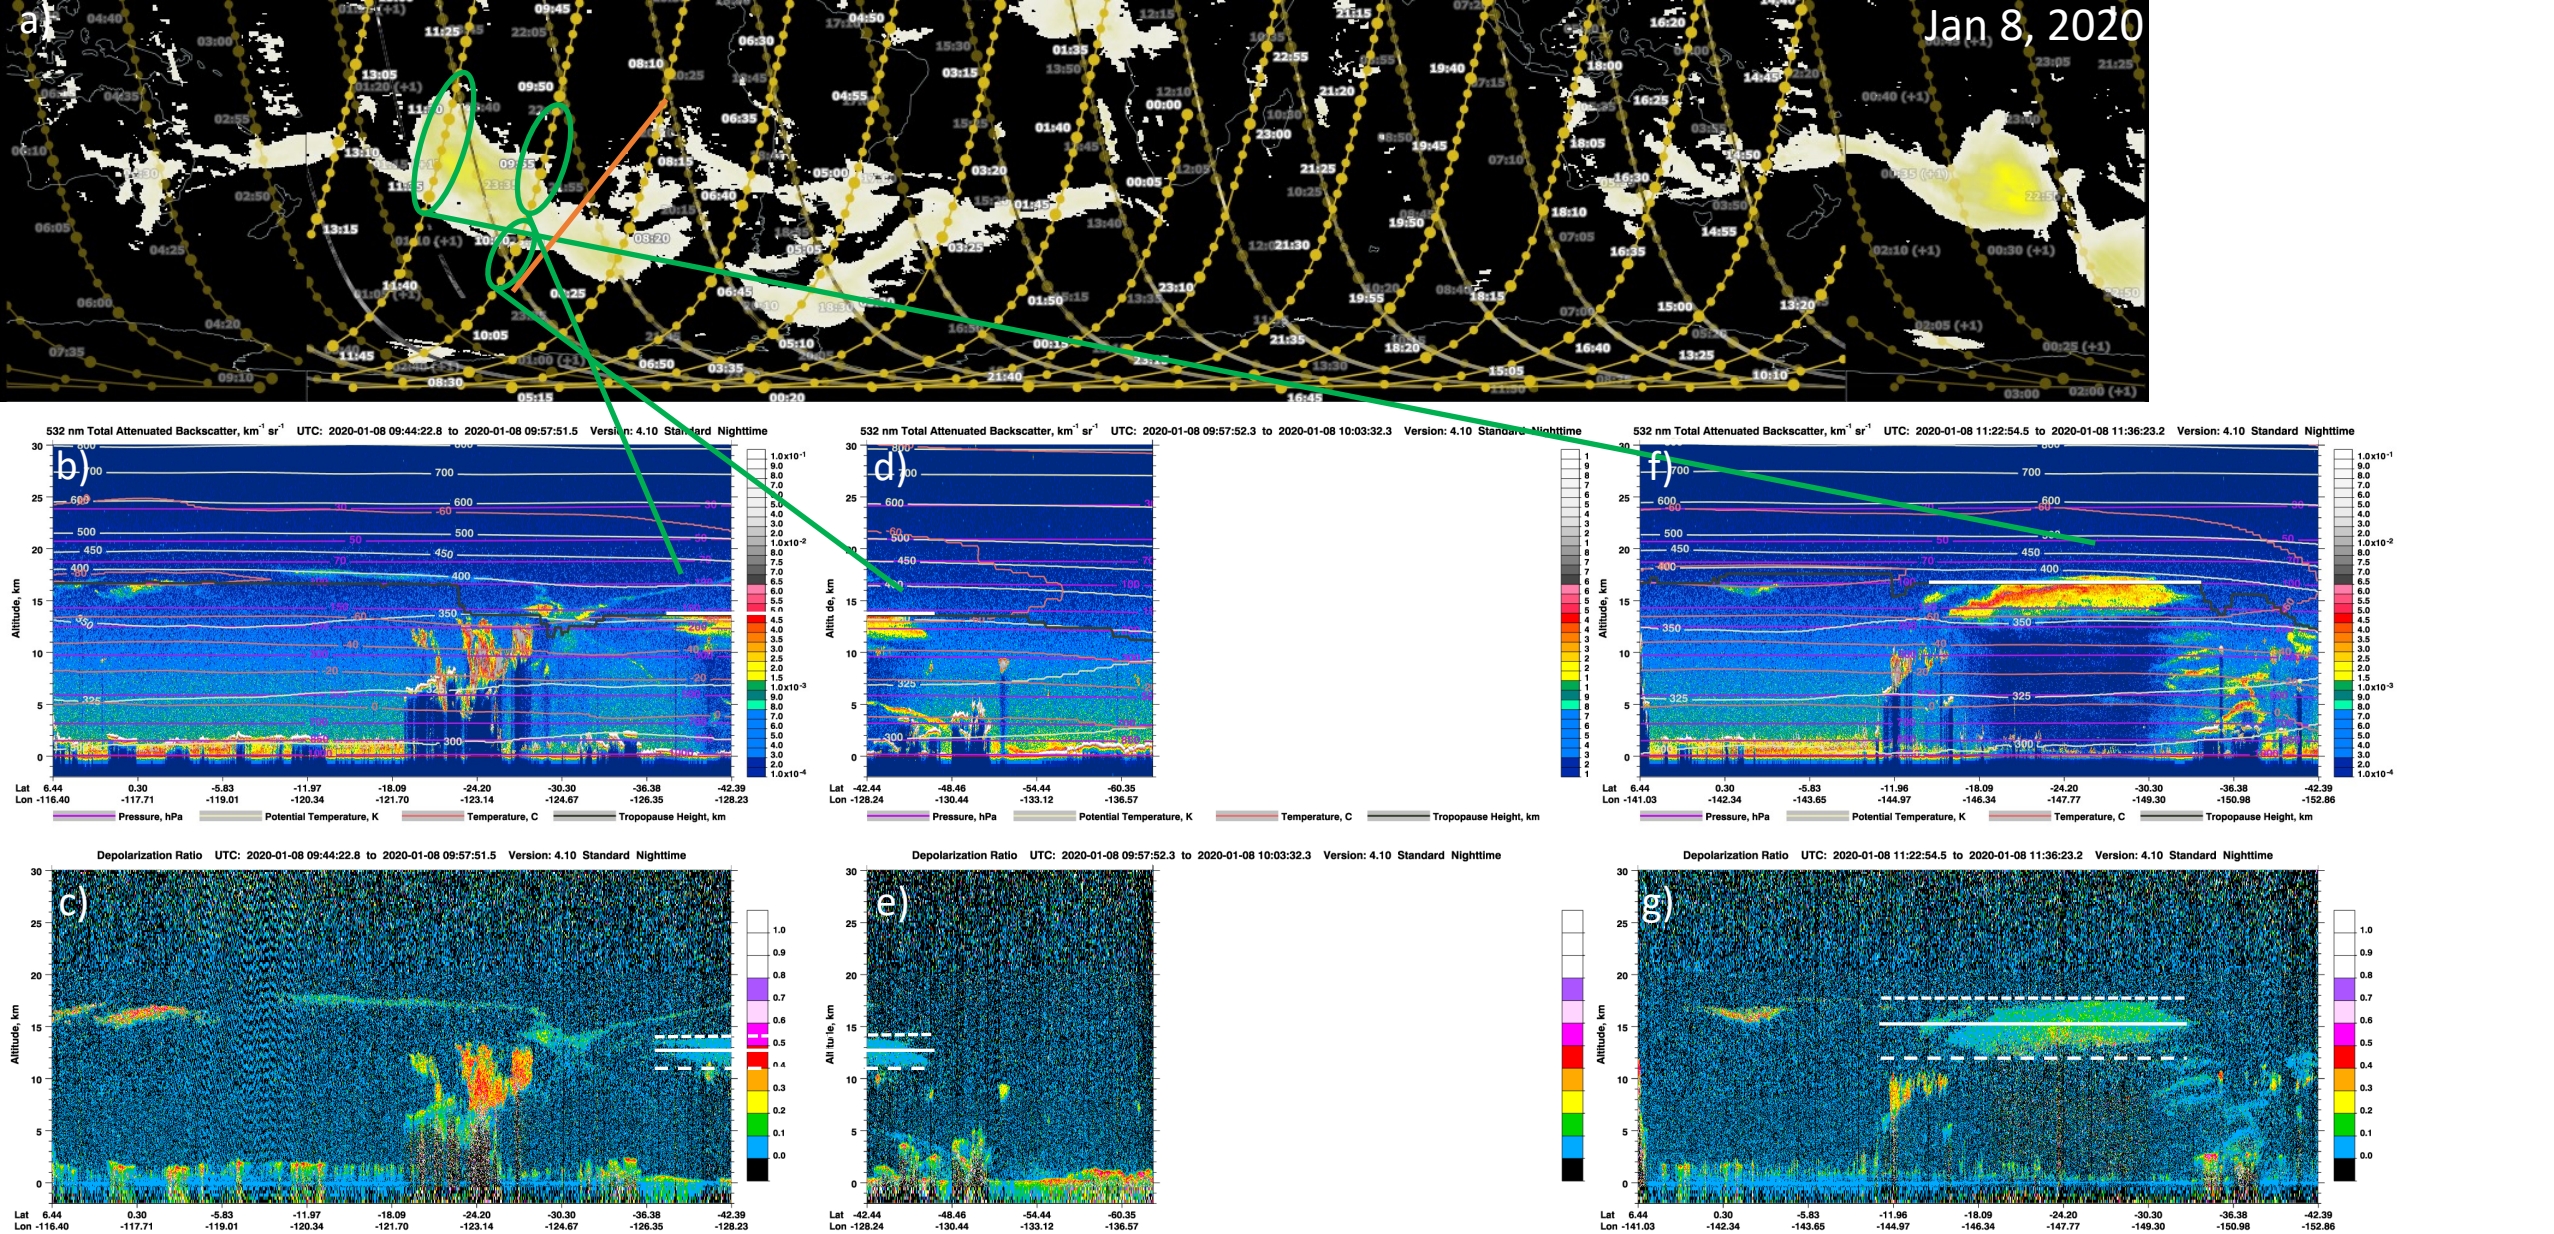

Figure S13. For figure description, see Text S1.



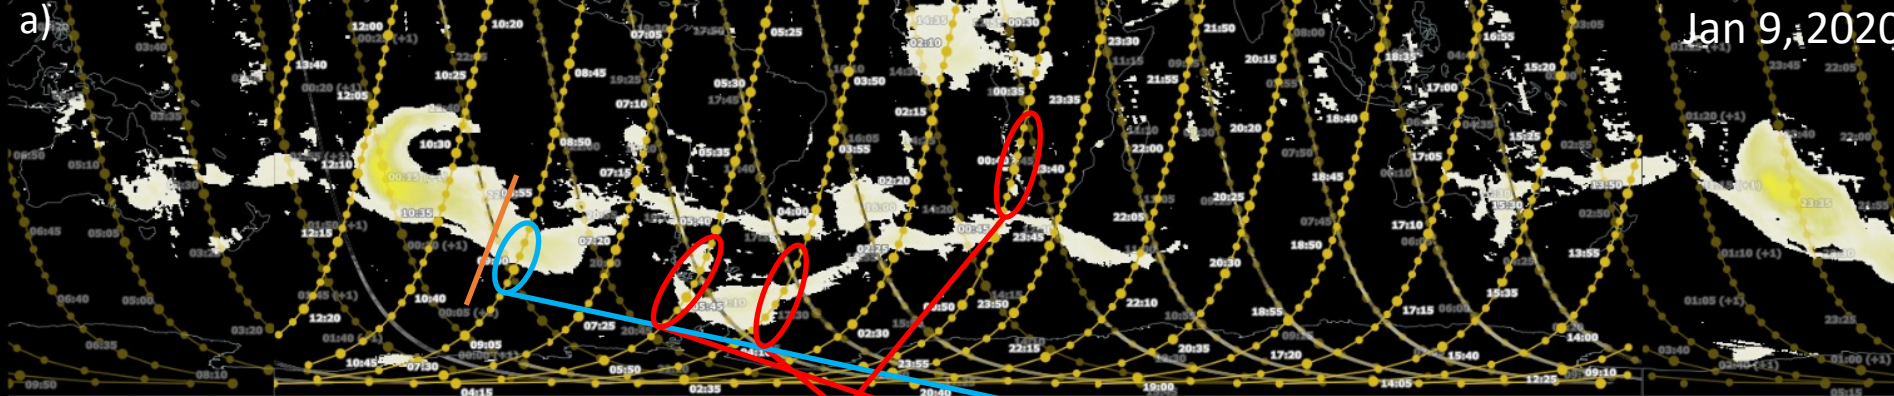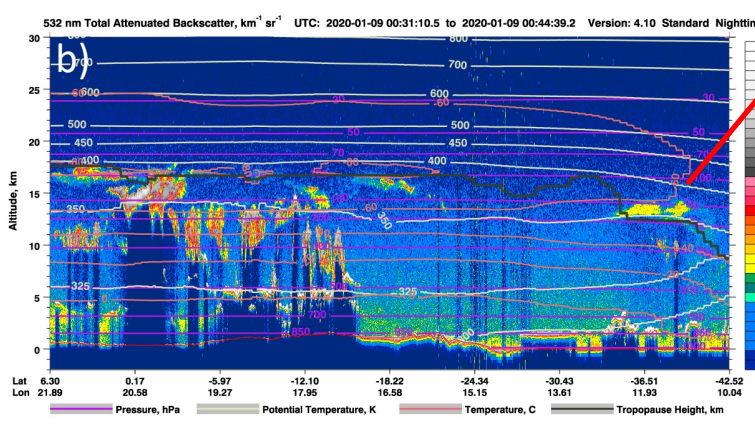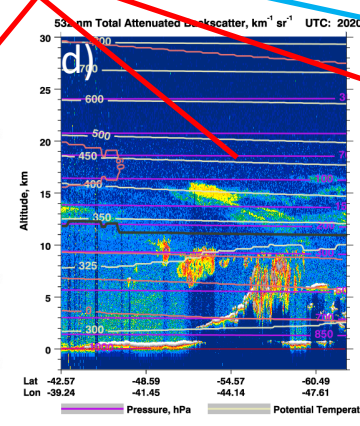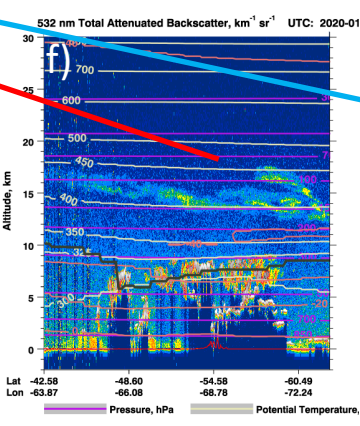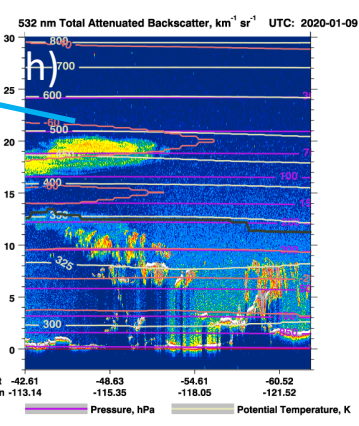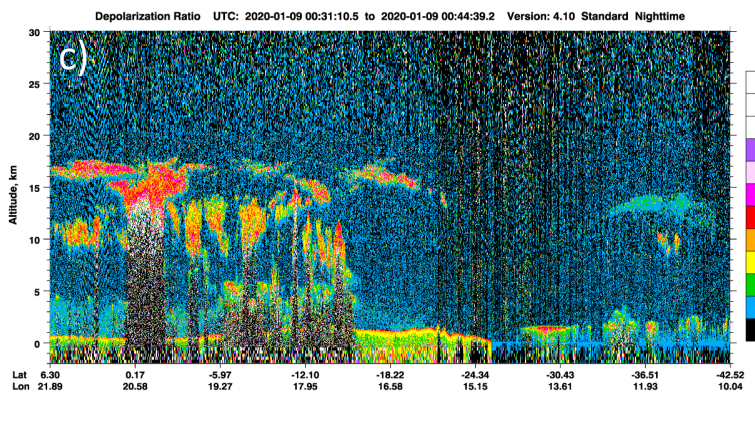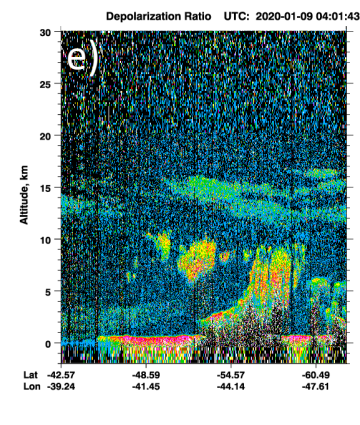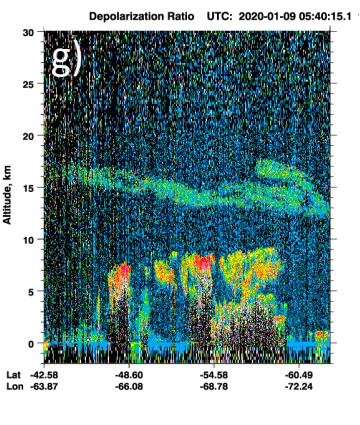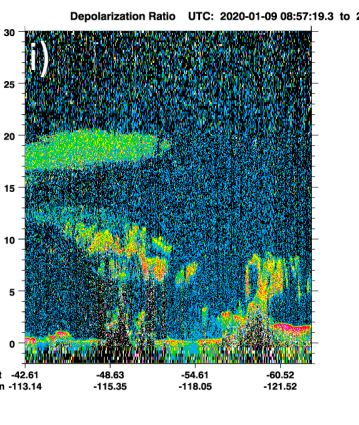

Figure S14. For figure description, see Text S1.

Jan 9, 2020

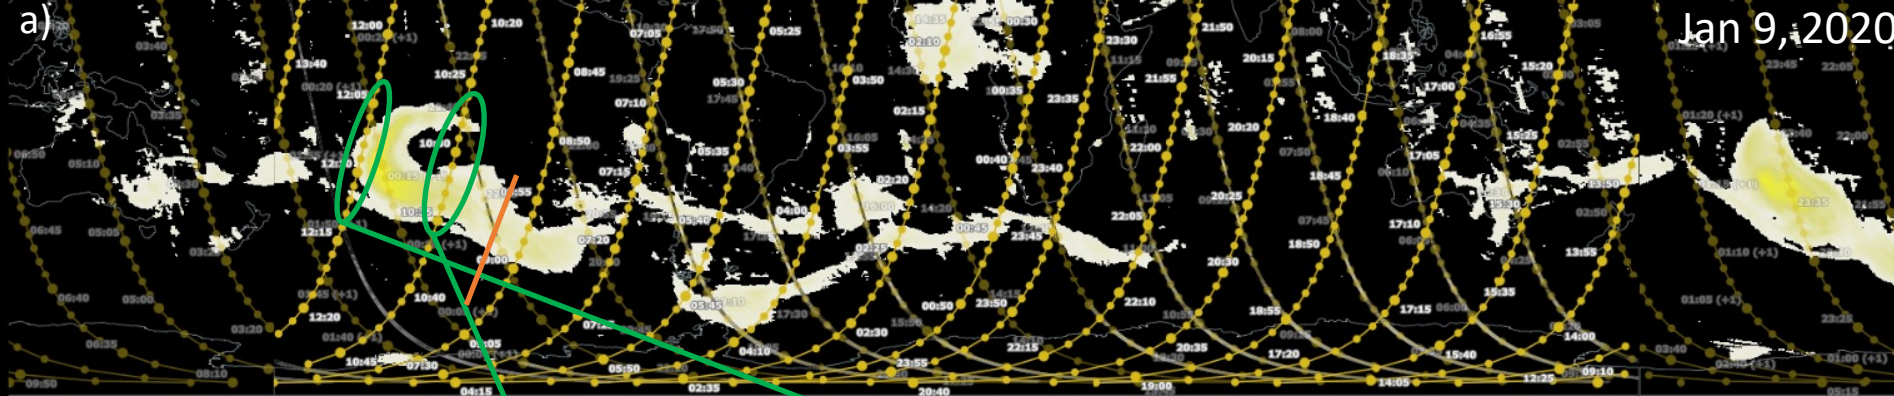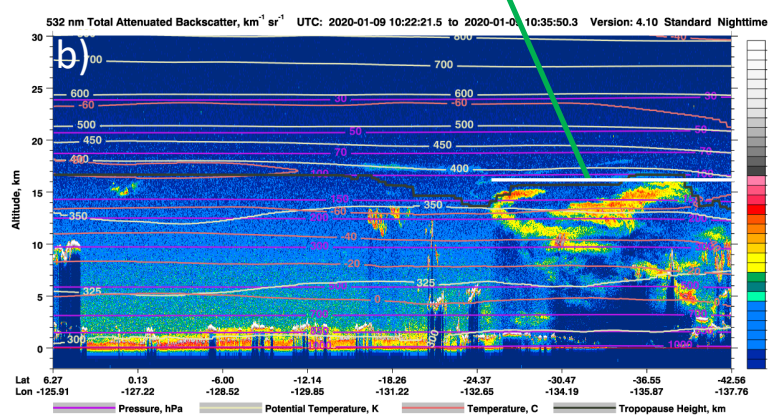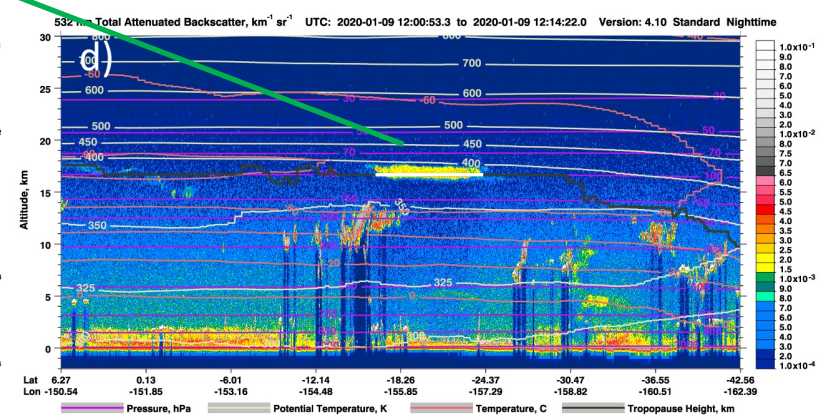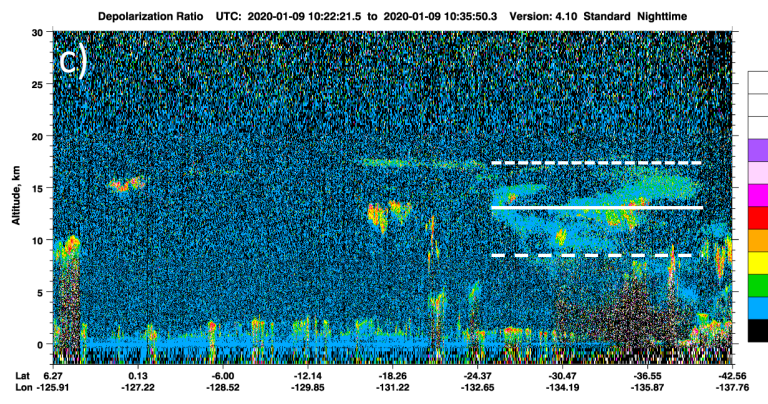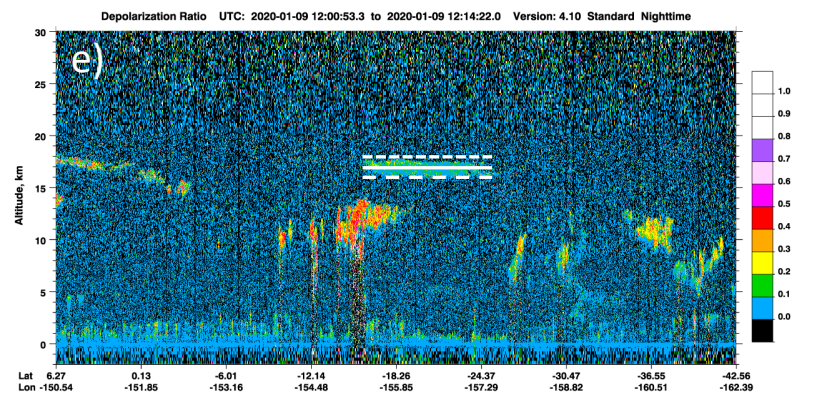

Figure S15. For figure description, see Text S1.

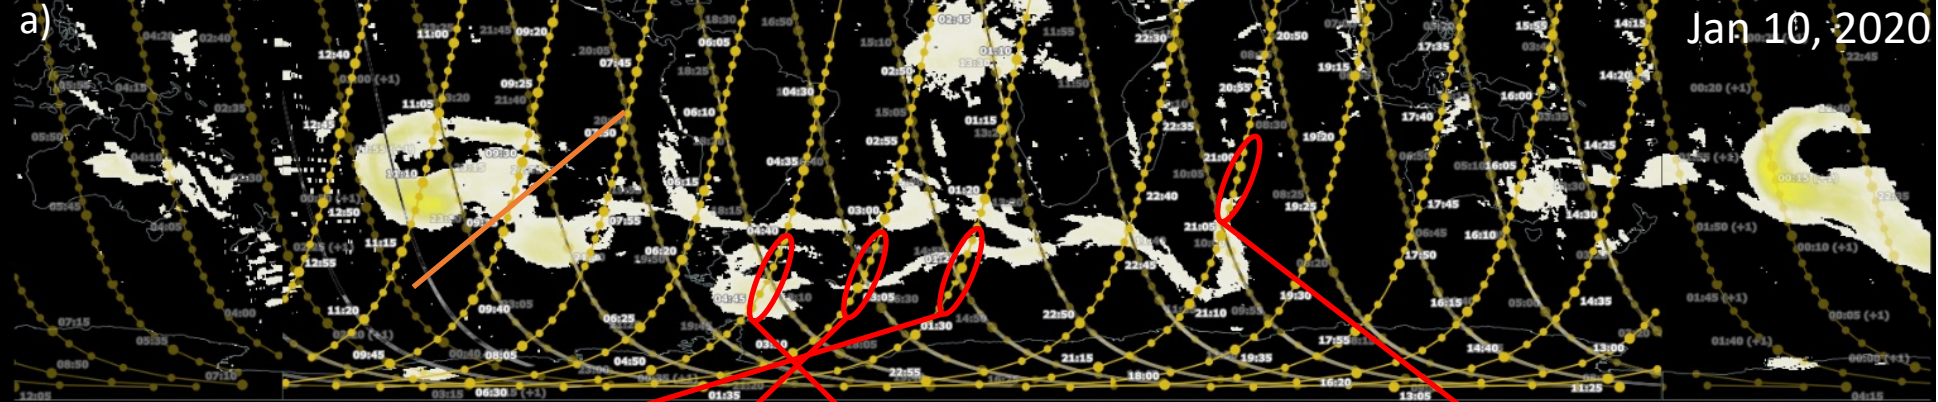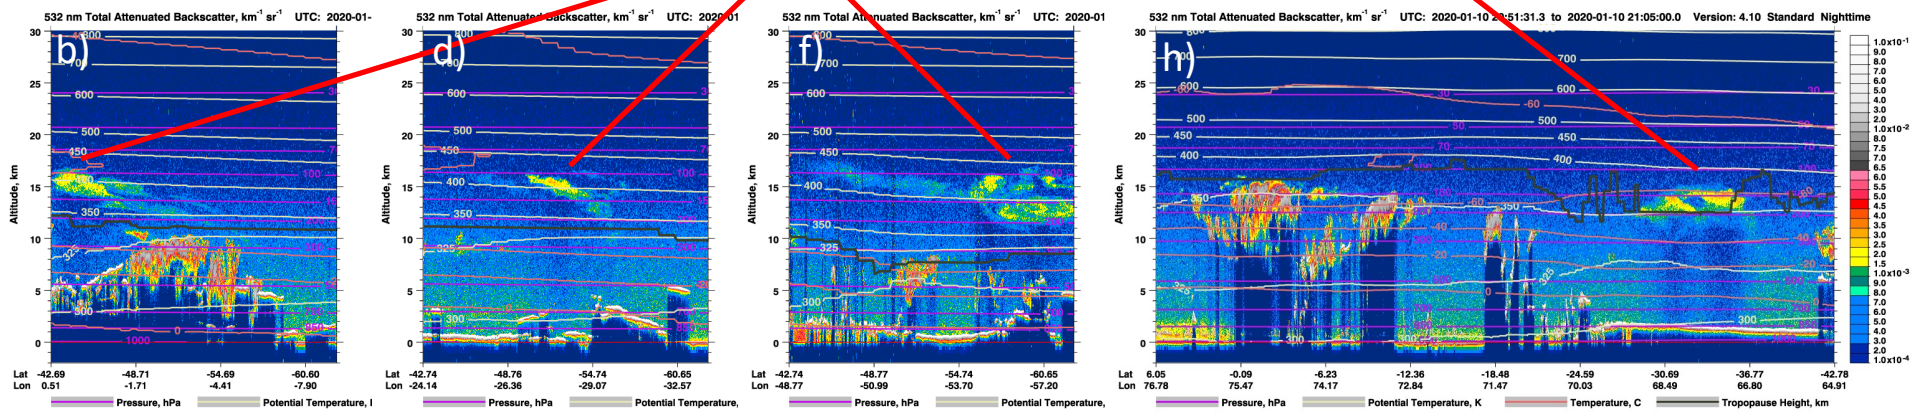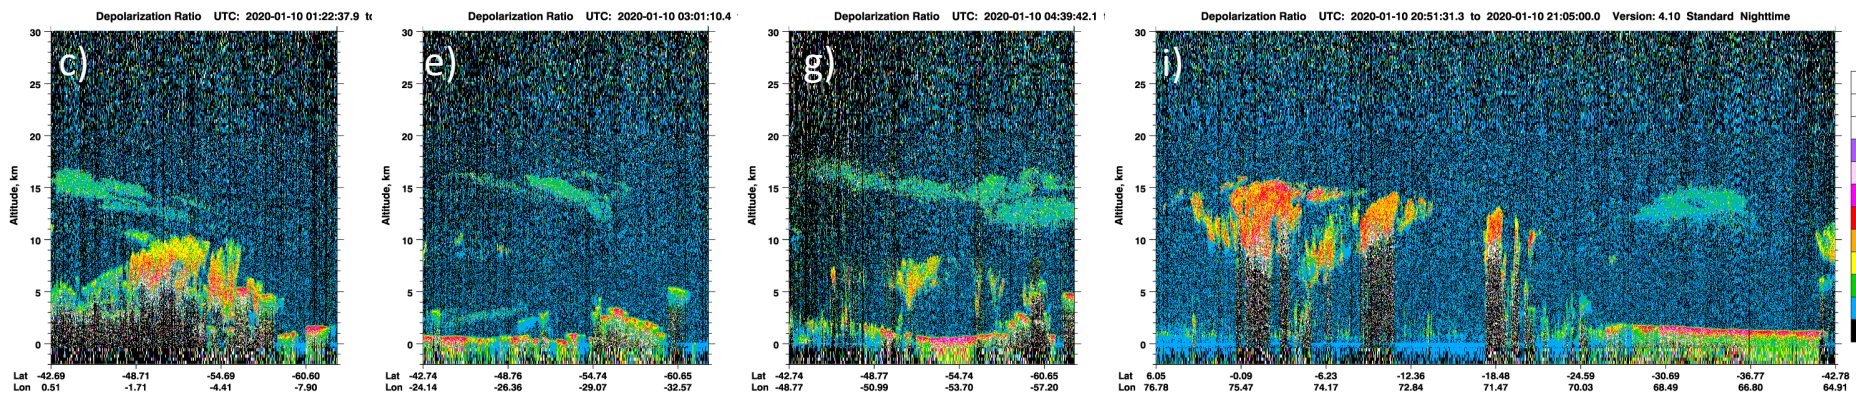

Figure S16. For figure description, see Text S1.

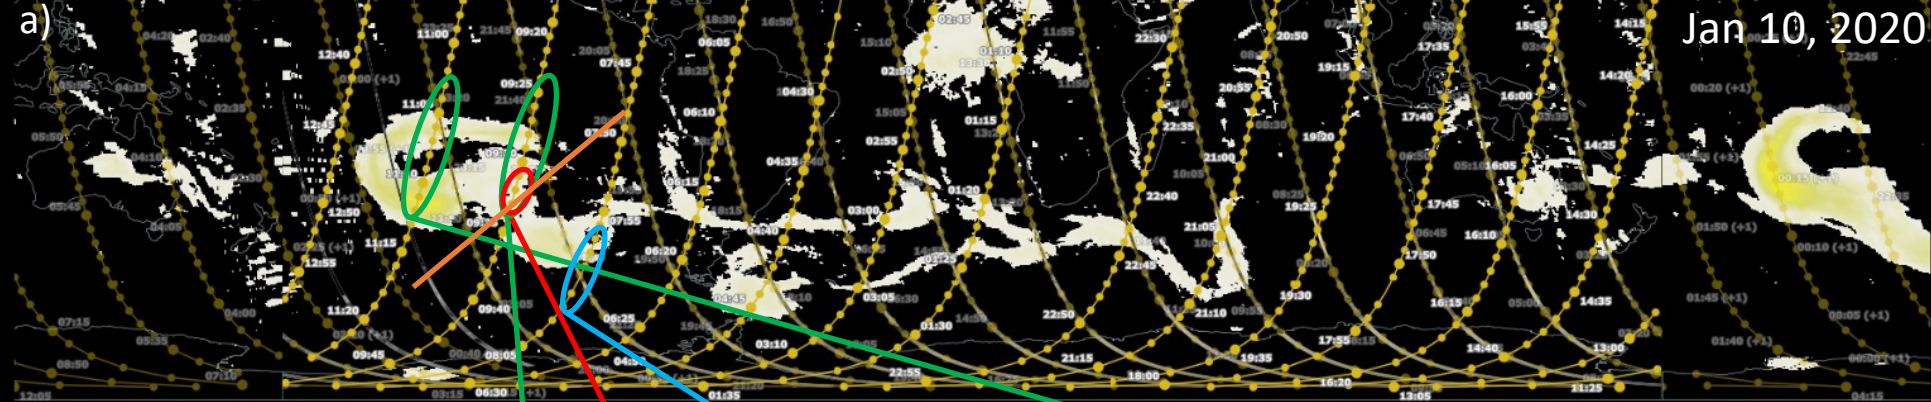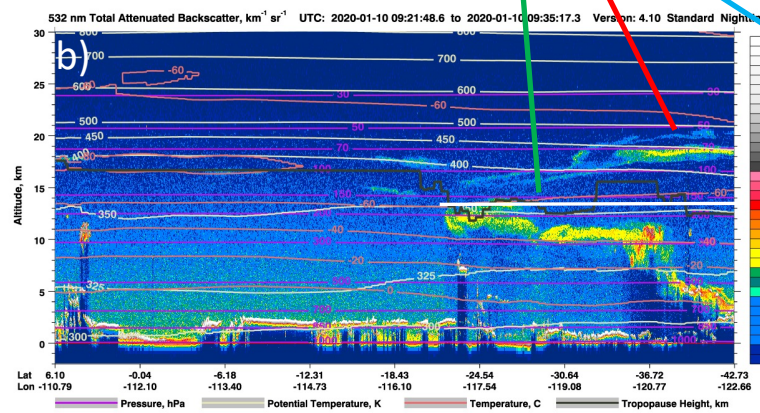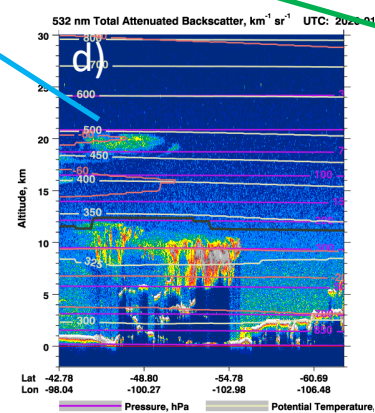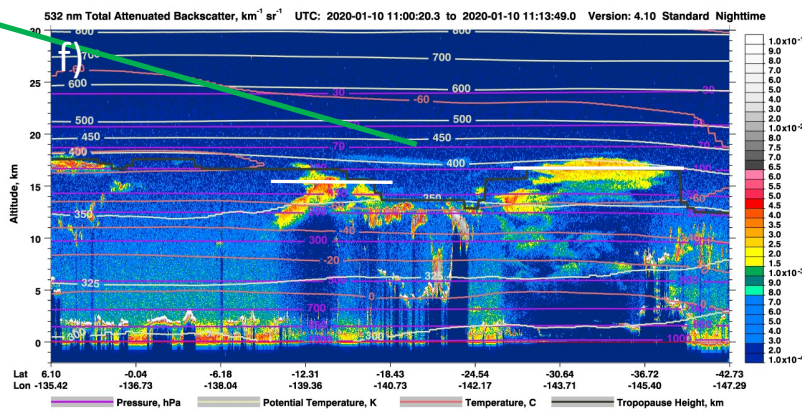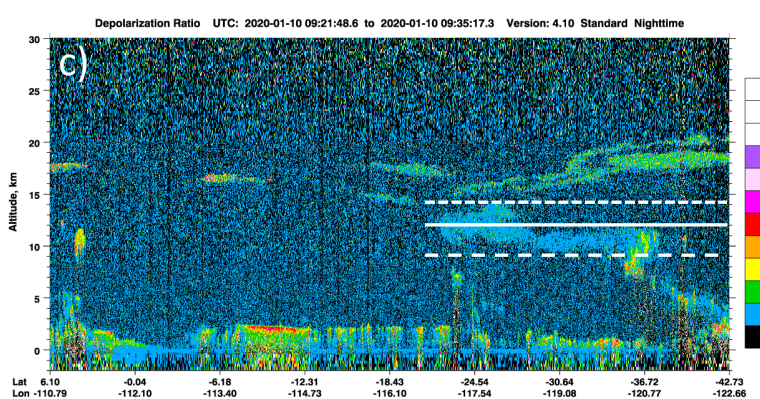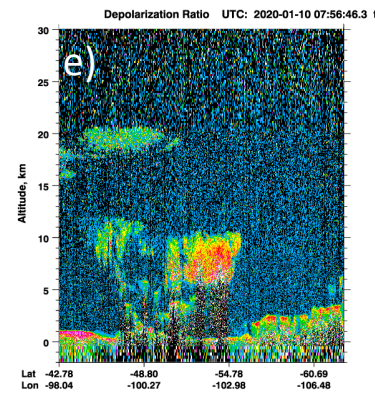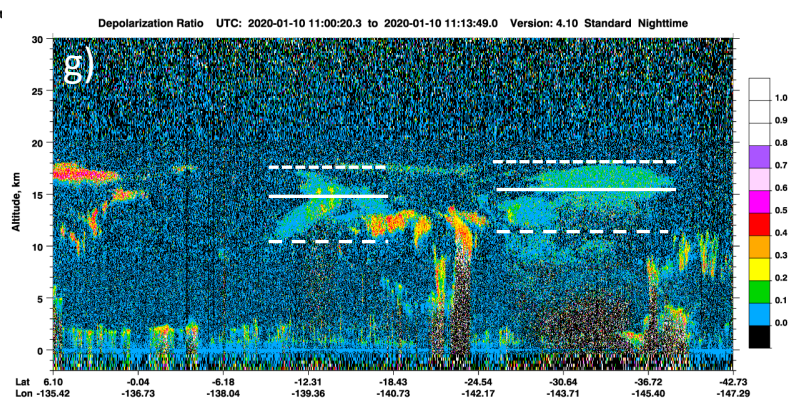

Figure S17. For figure description, see Text S1.

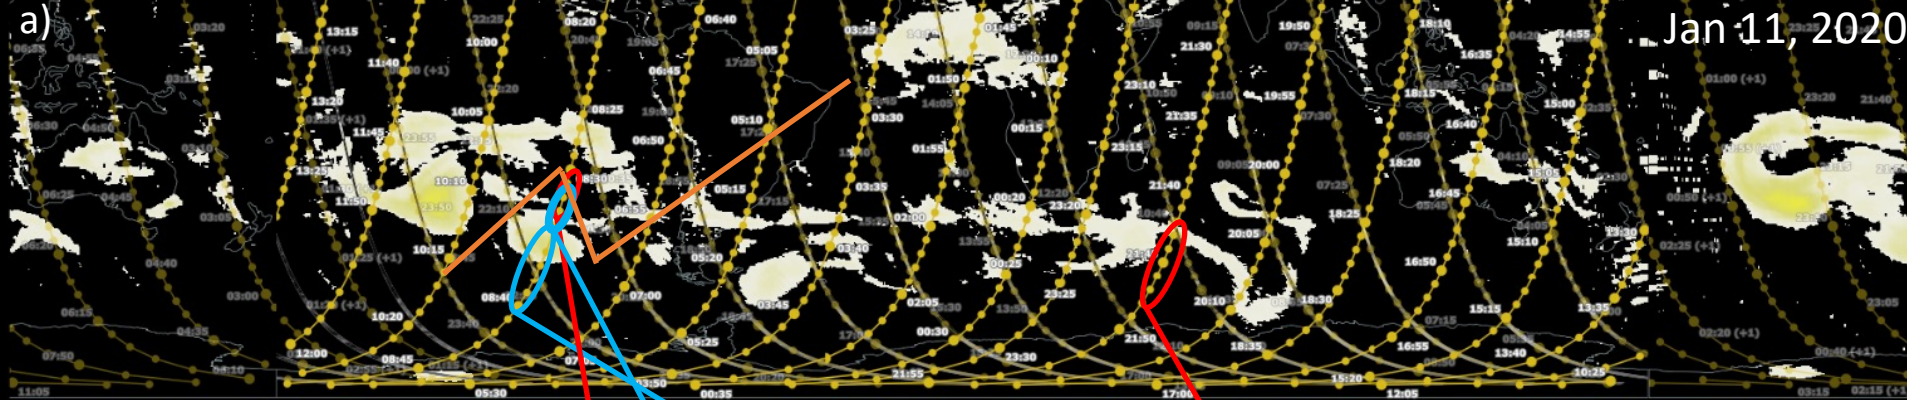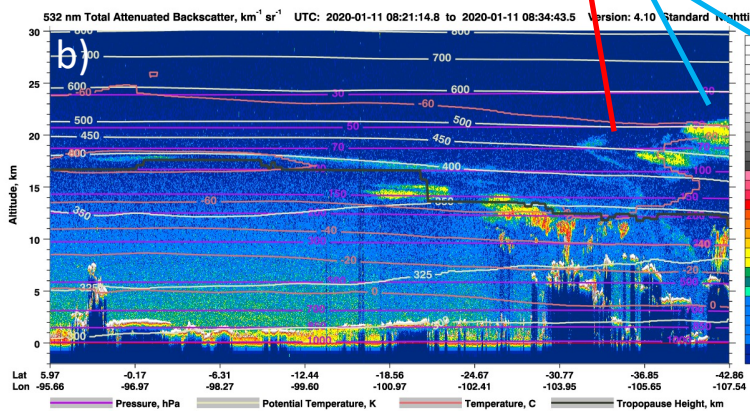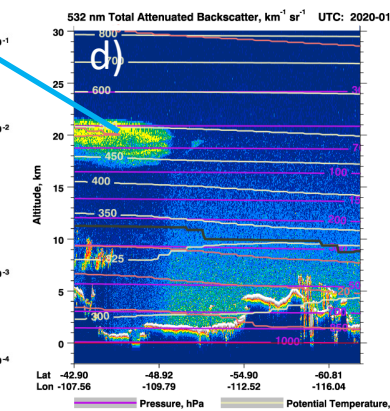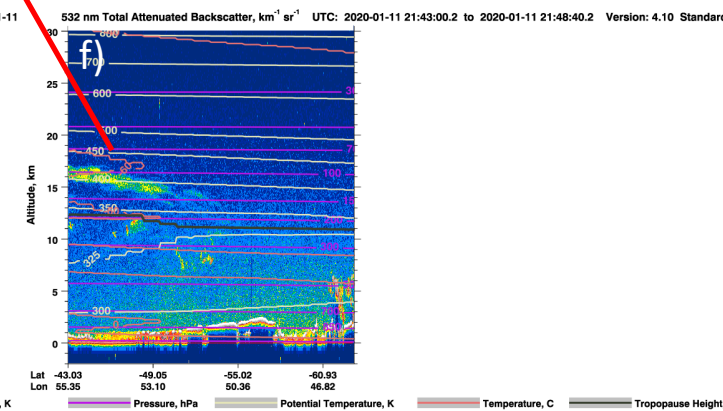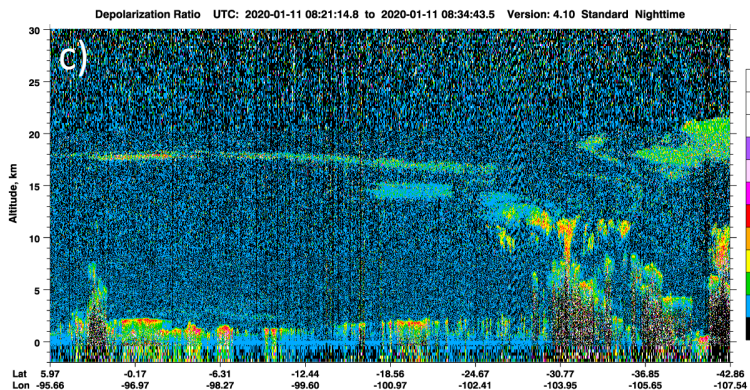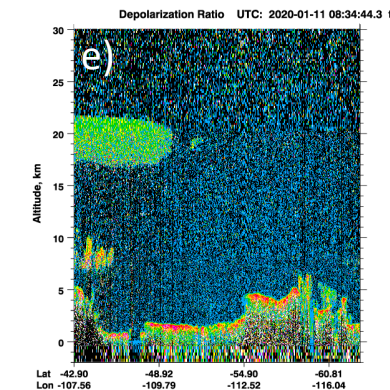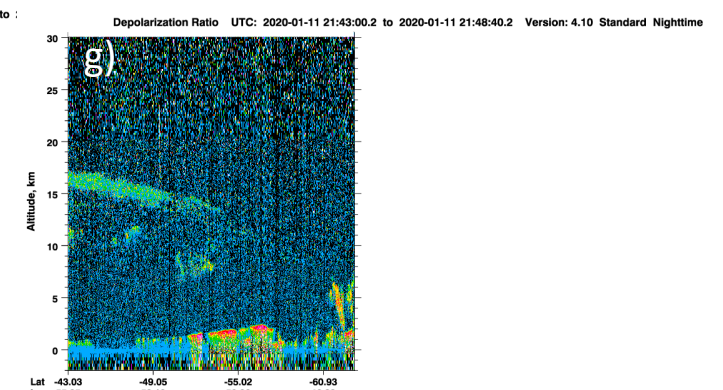

Figure S18. For figure description, see Text S1.

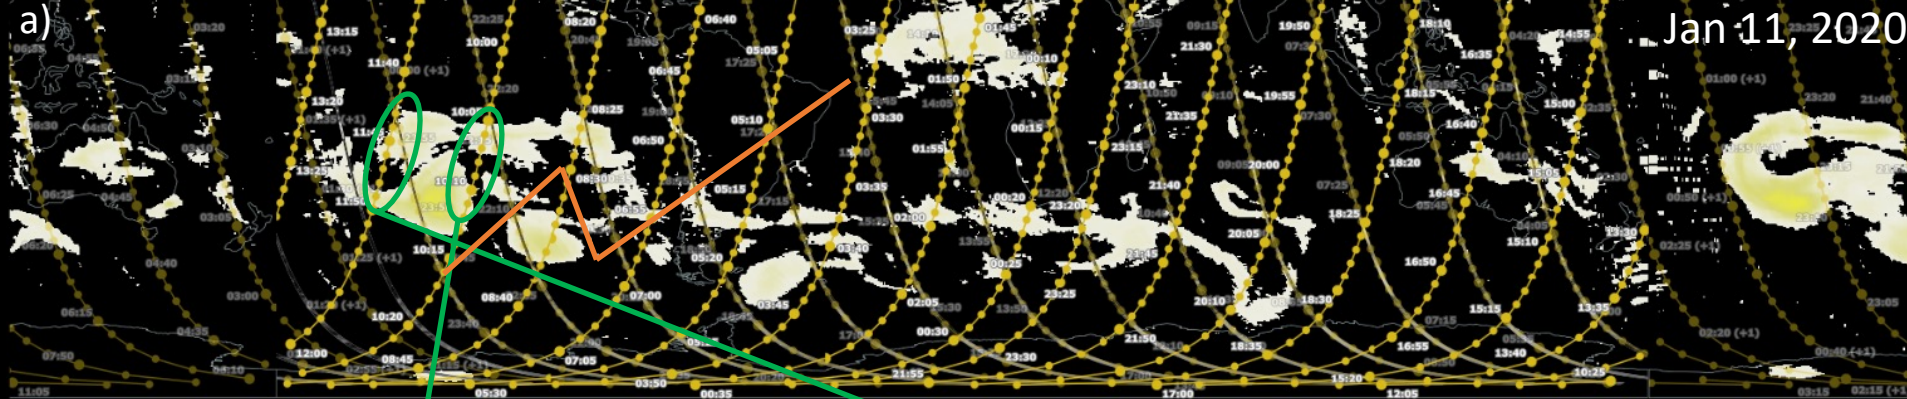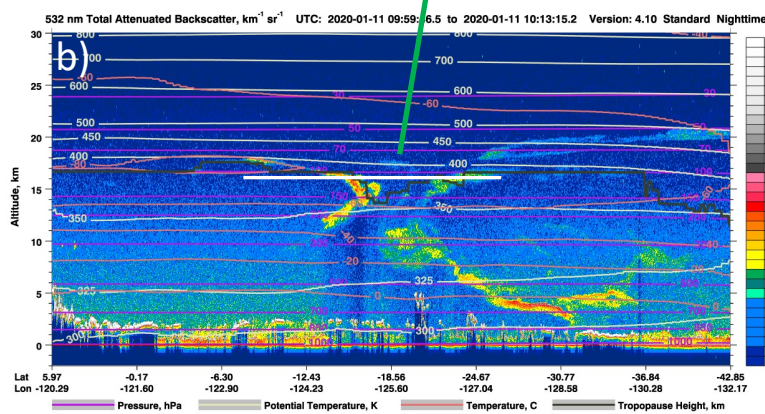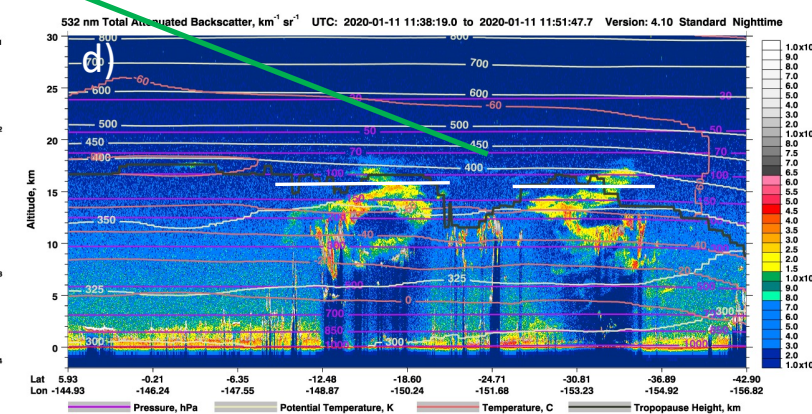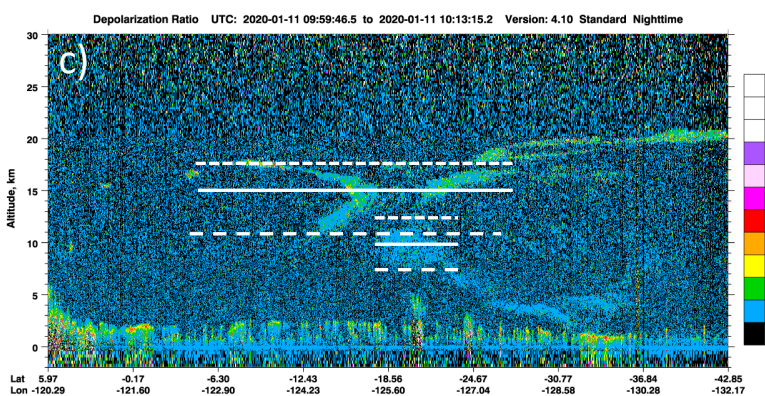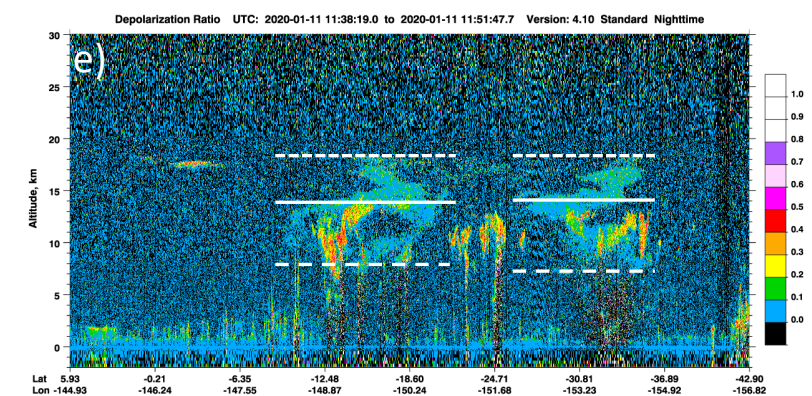

Figure S19. For figure description, see Text S1.

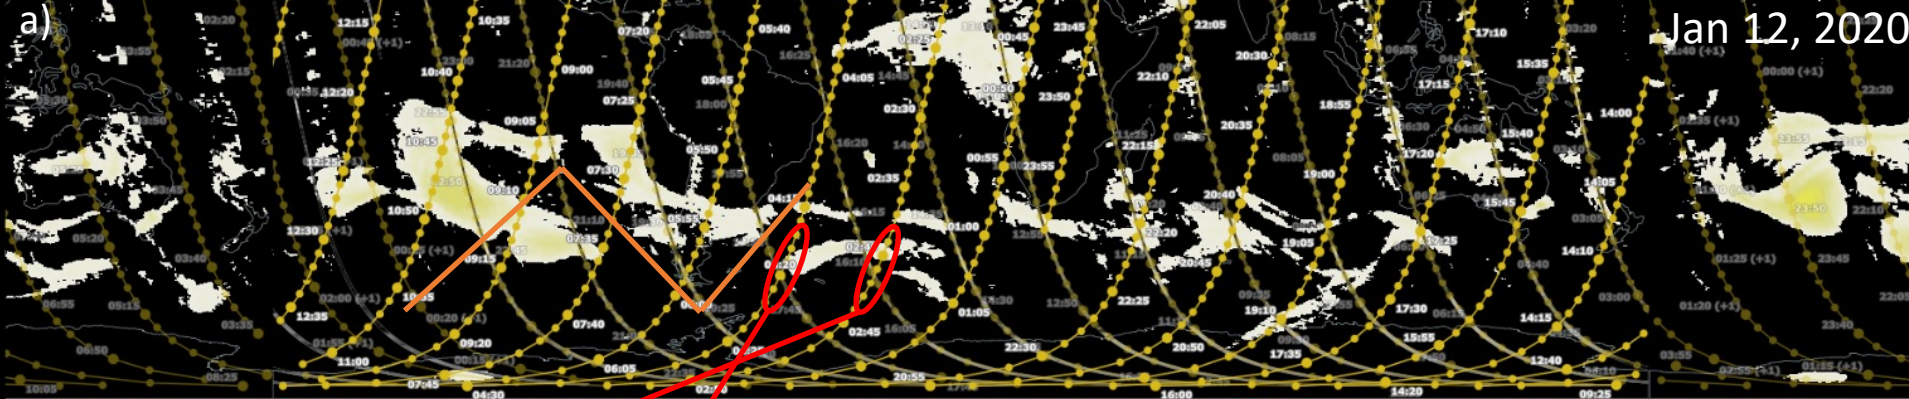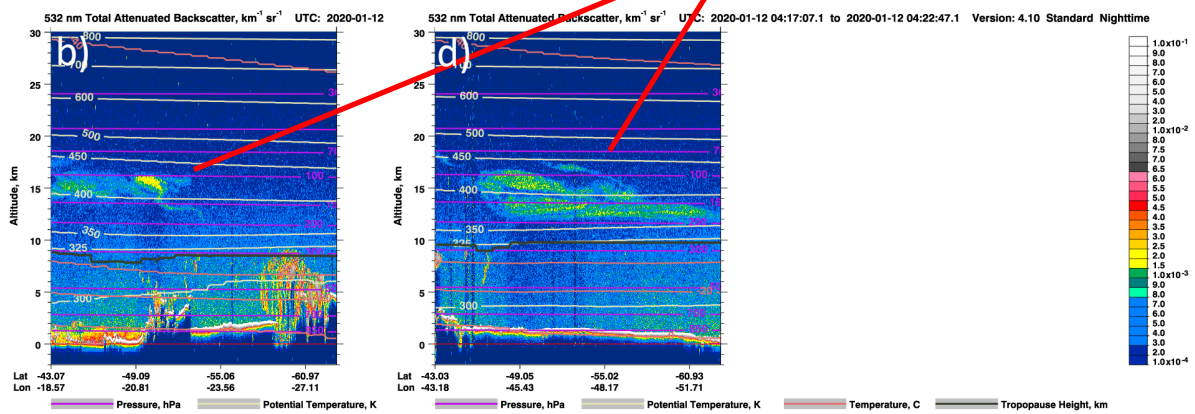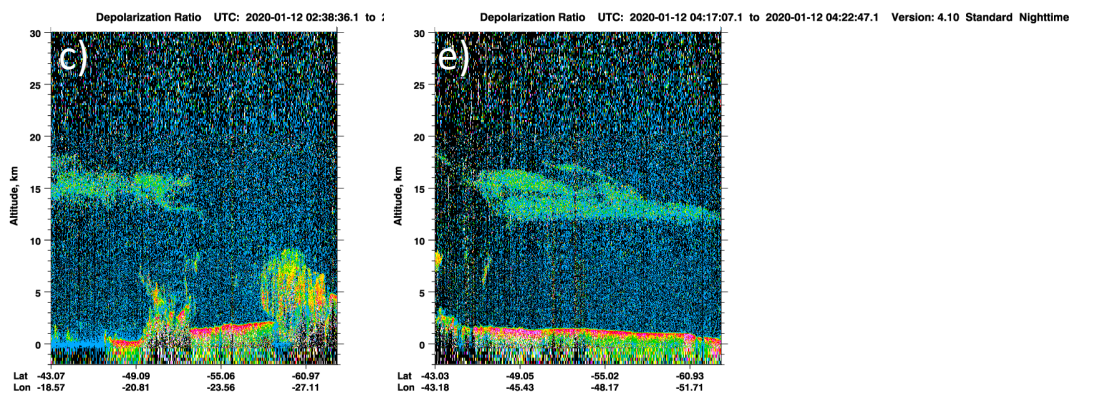

Figure S20. For figure description, see Text S1.





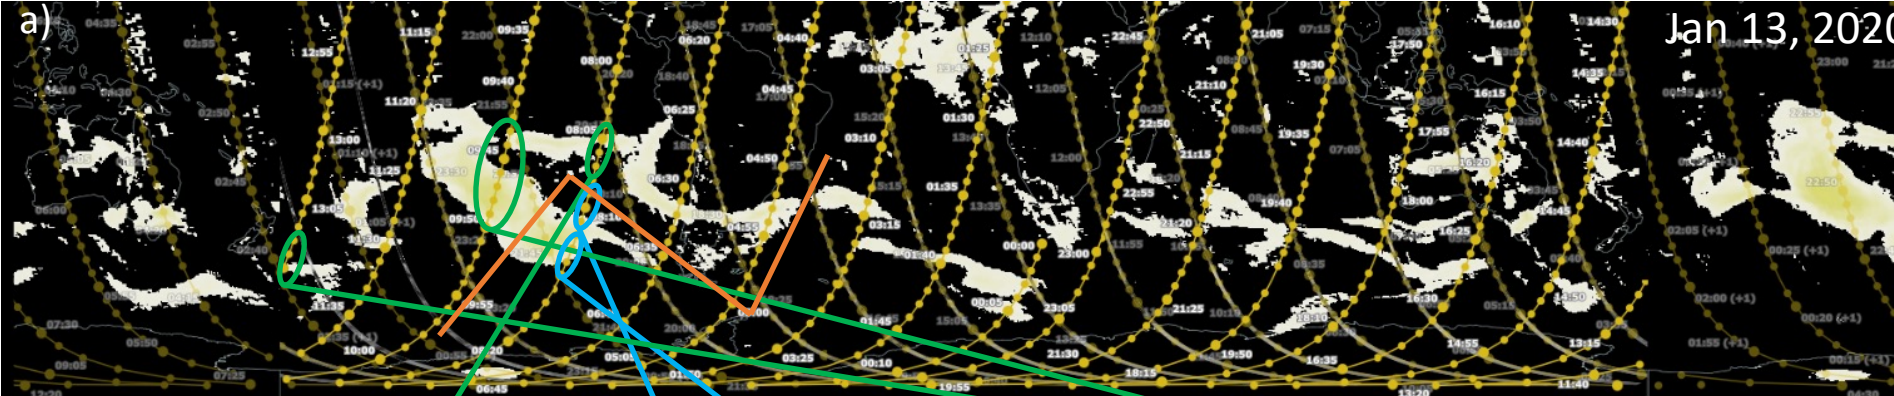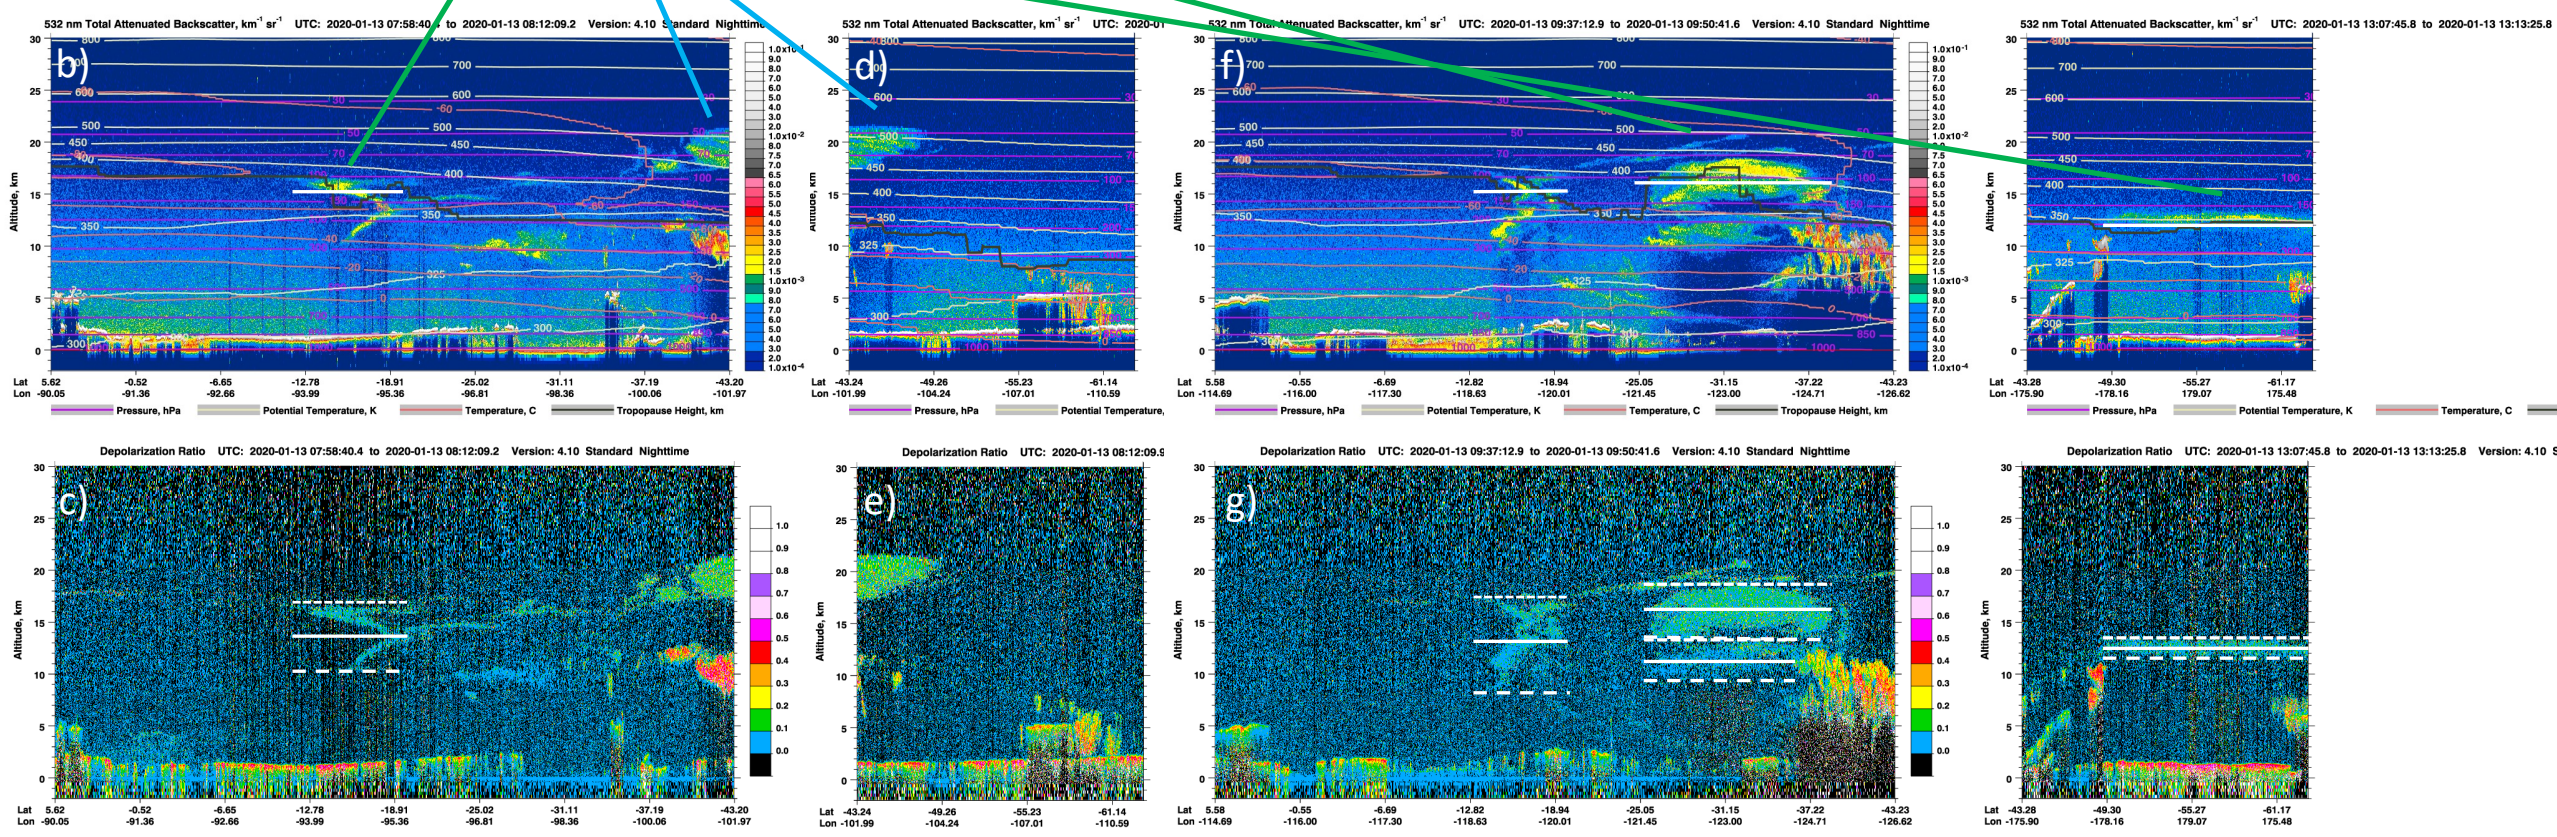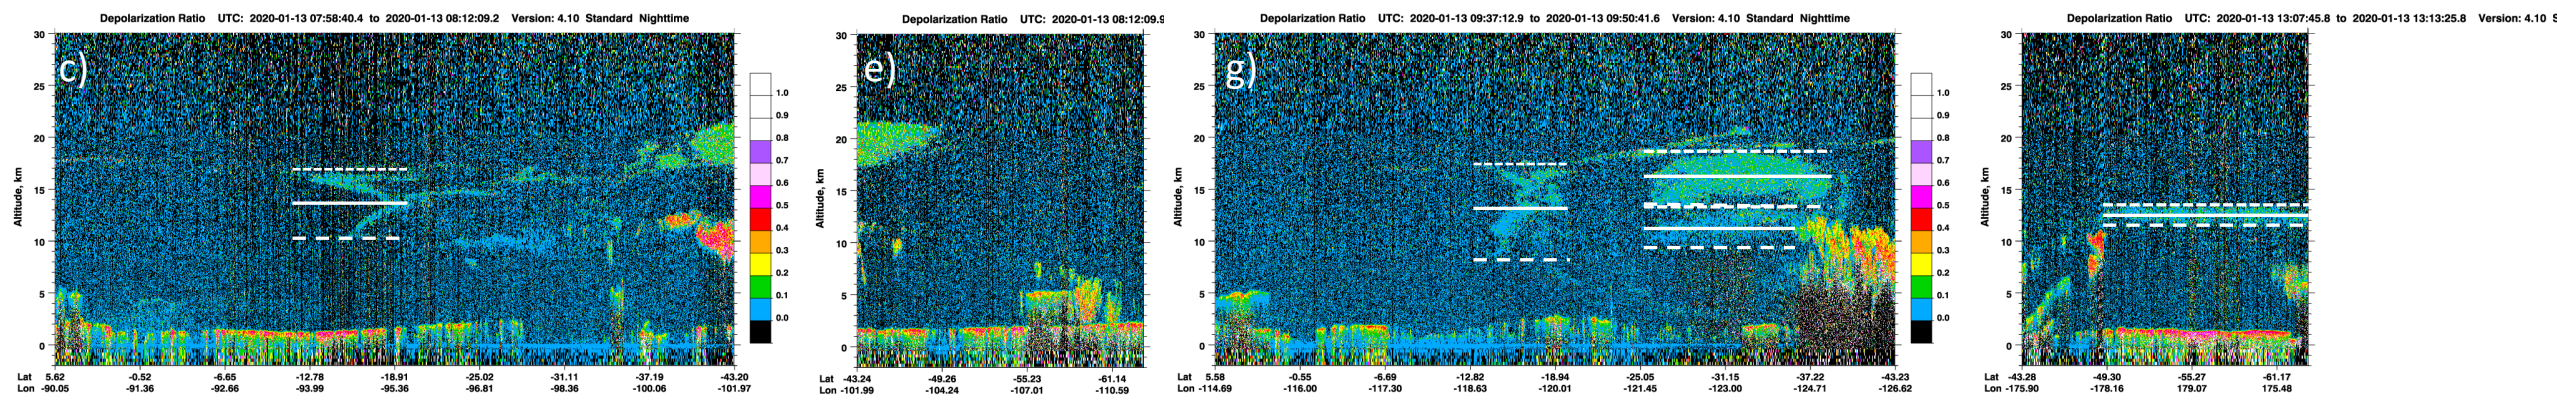

Figure S22. For figure description, see Text S1.

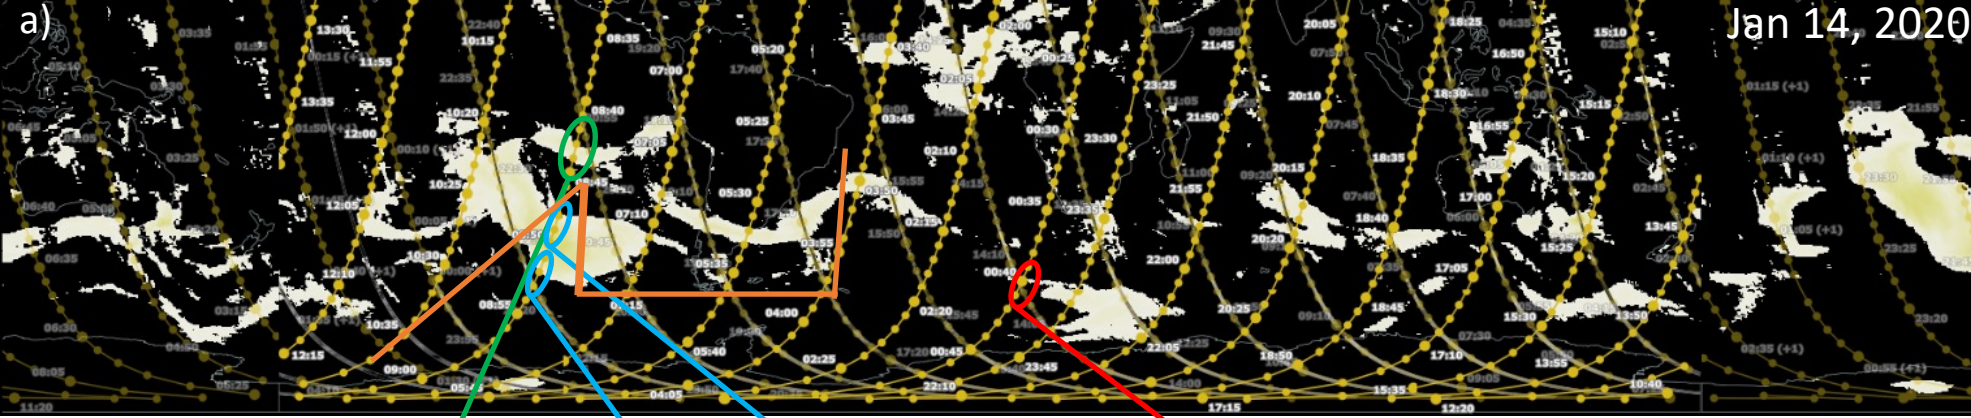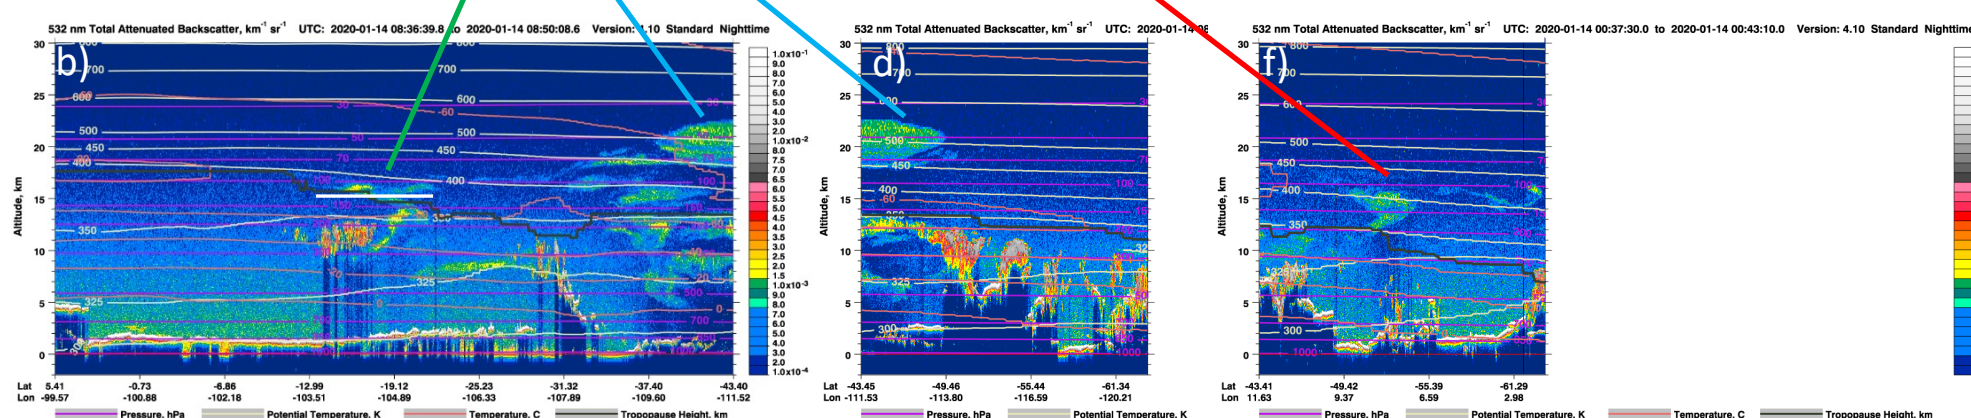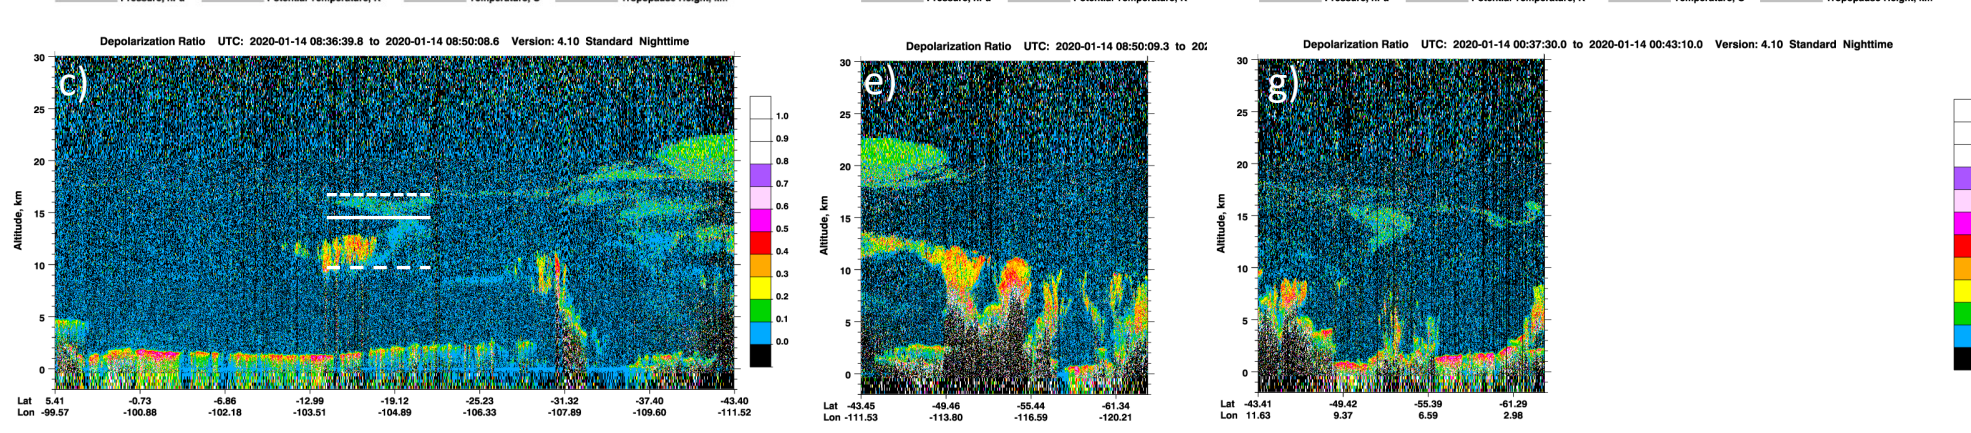

Figure S23. For figure description, see Text S1.

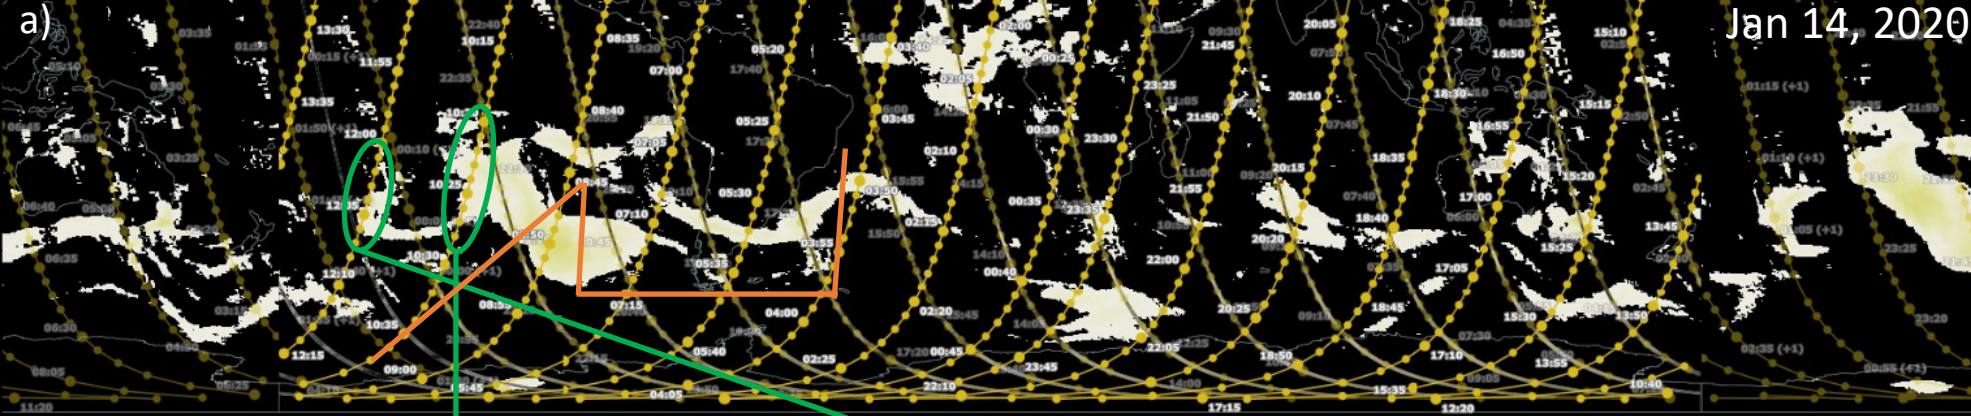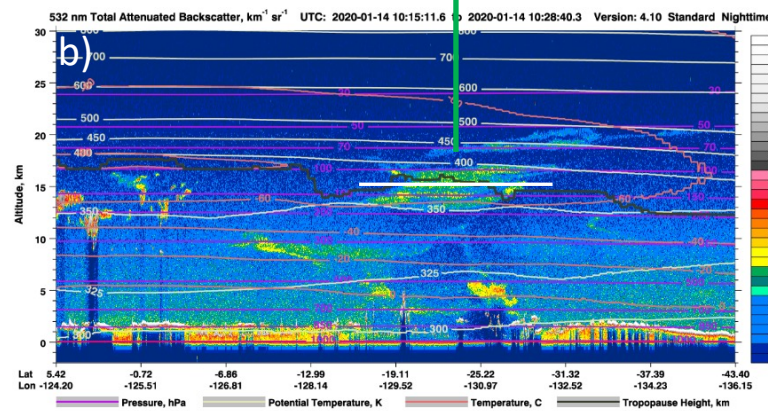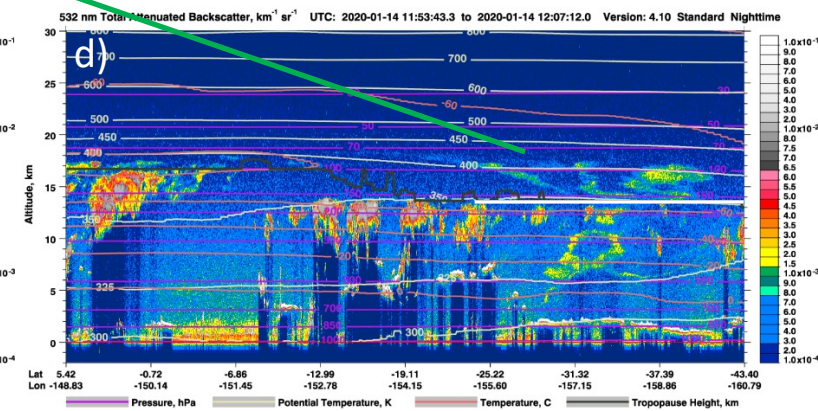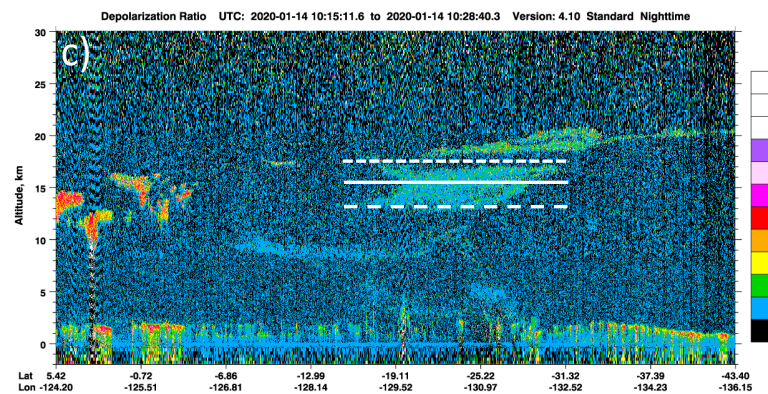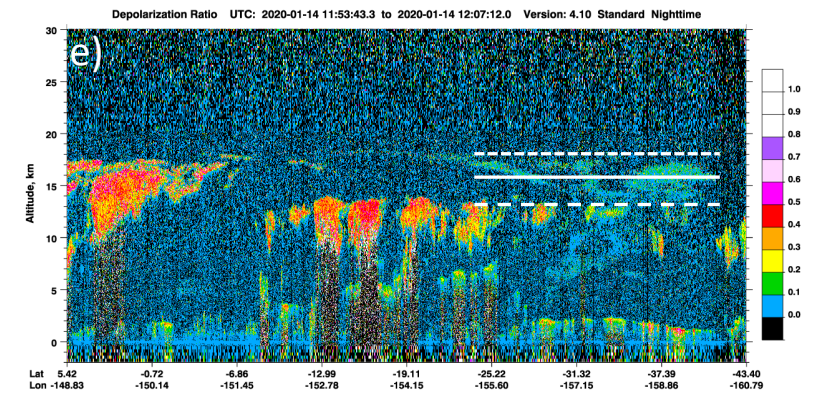

Figure S24. For figure description, see Text S1.

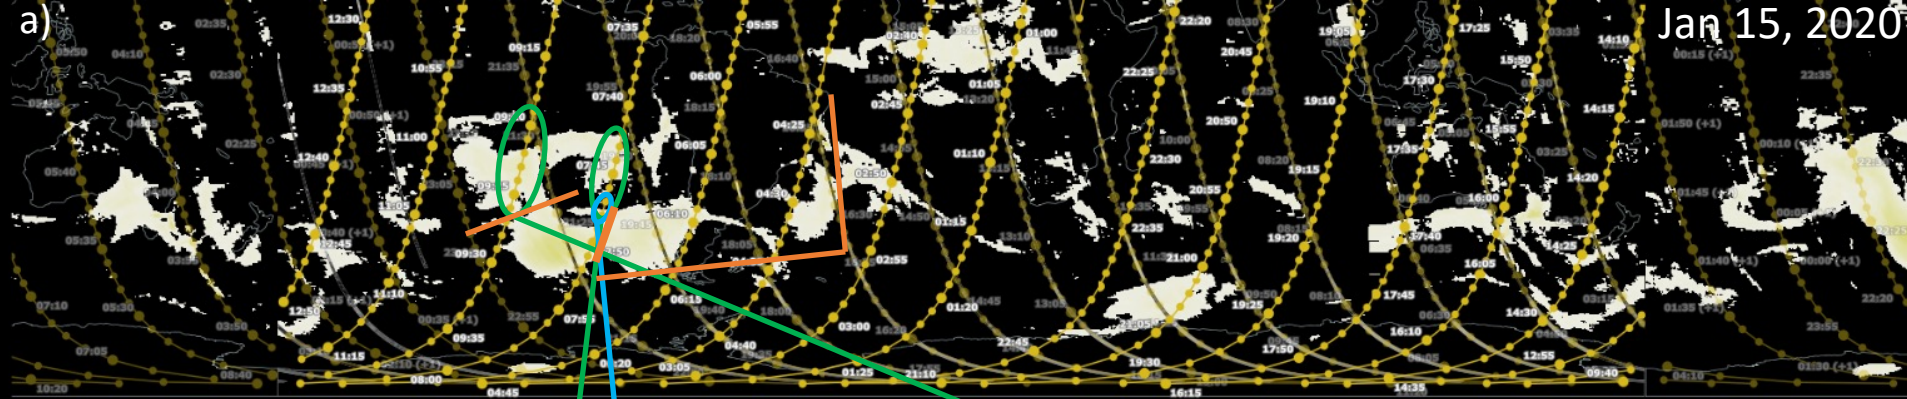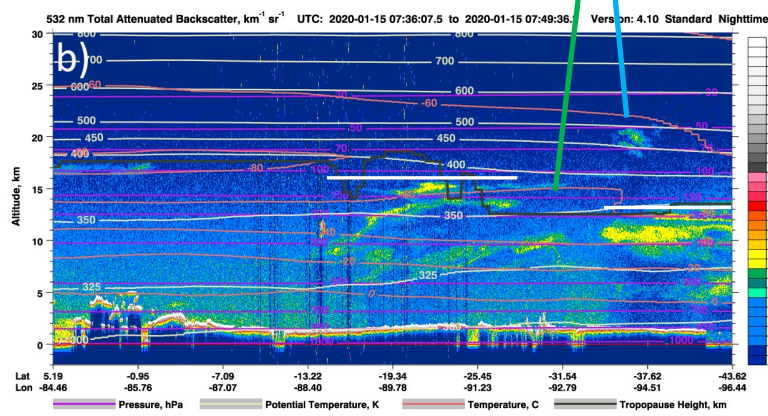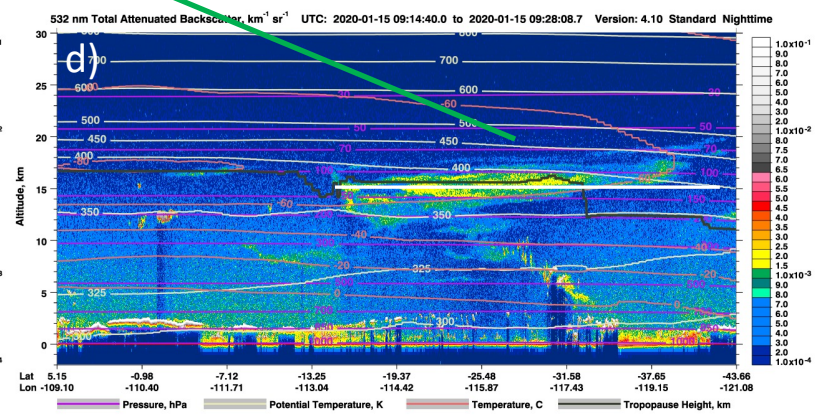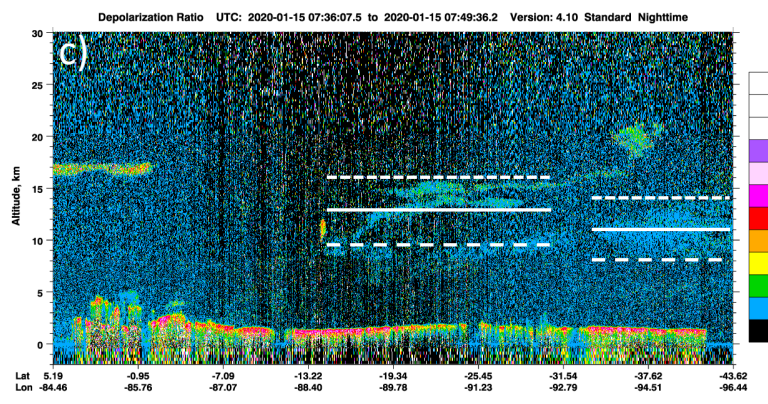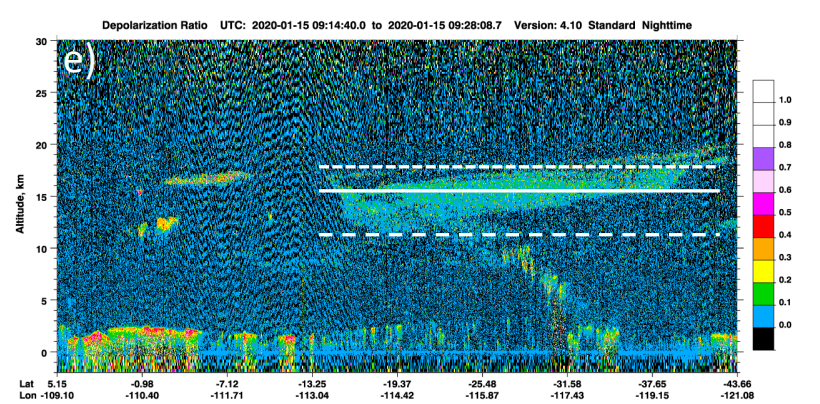

Figure S25. For figure description, see Text S1.

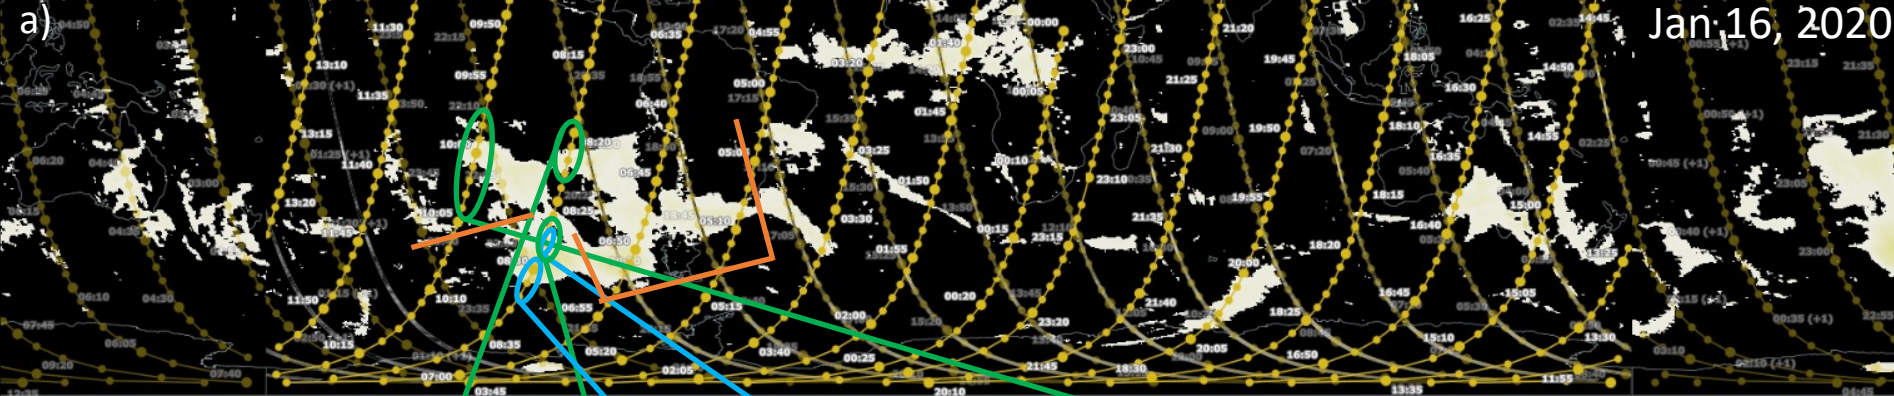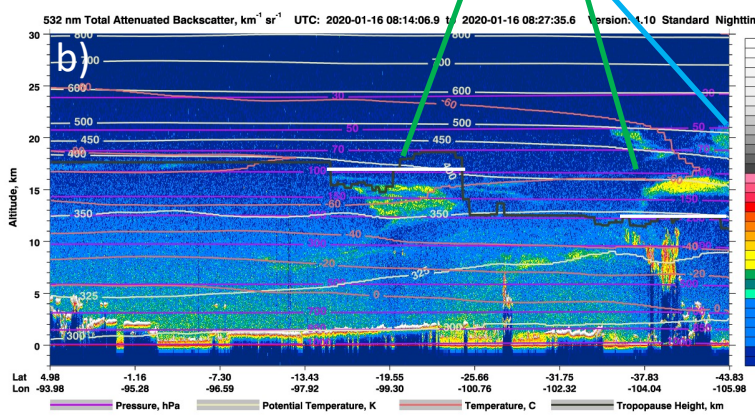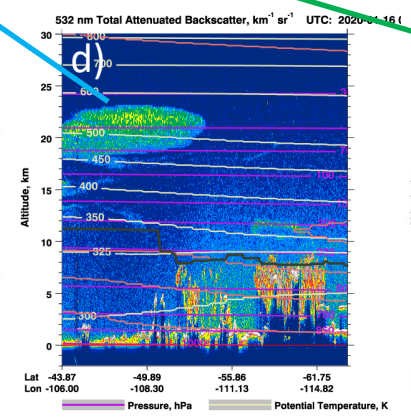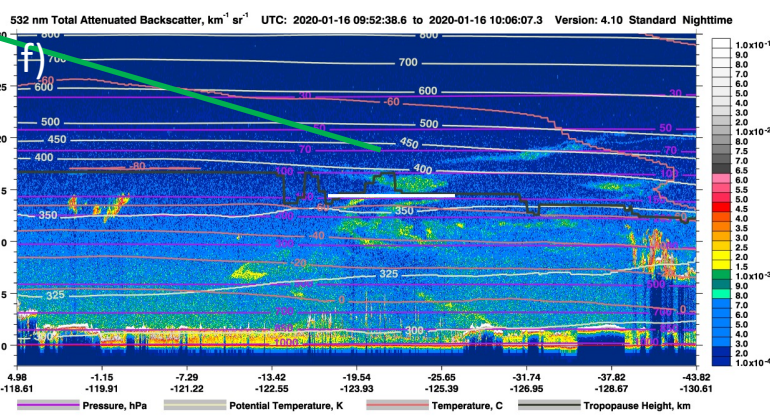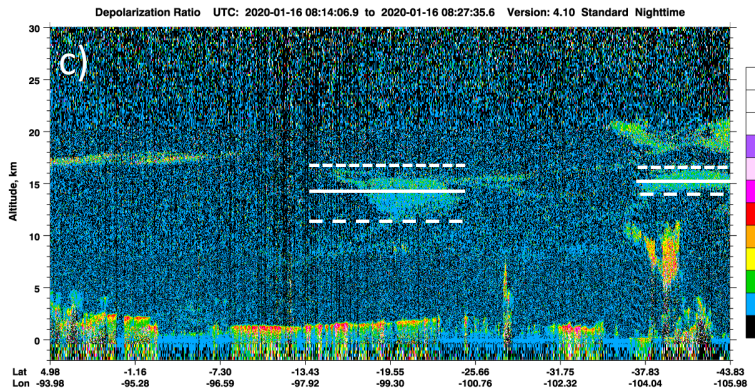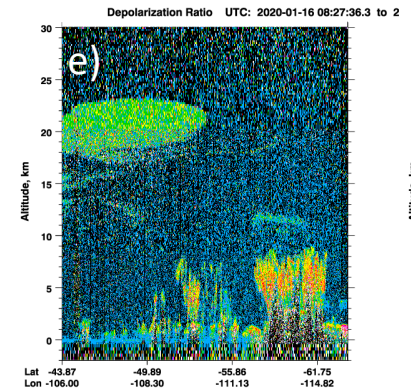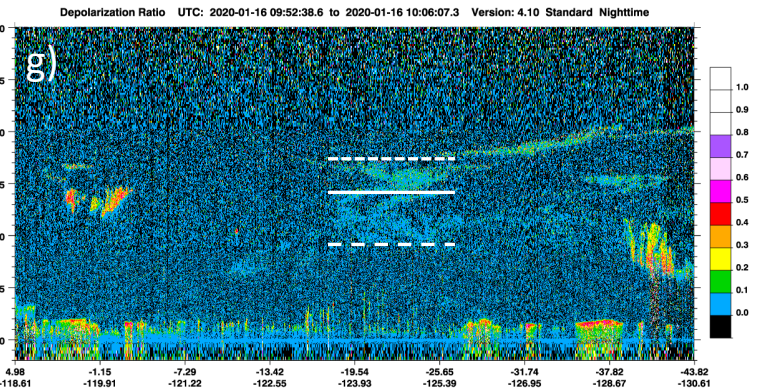

Figure S26. For figure description, see Text S1.

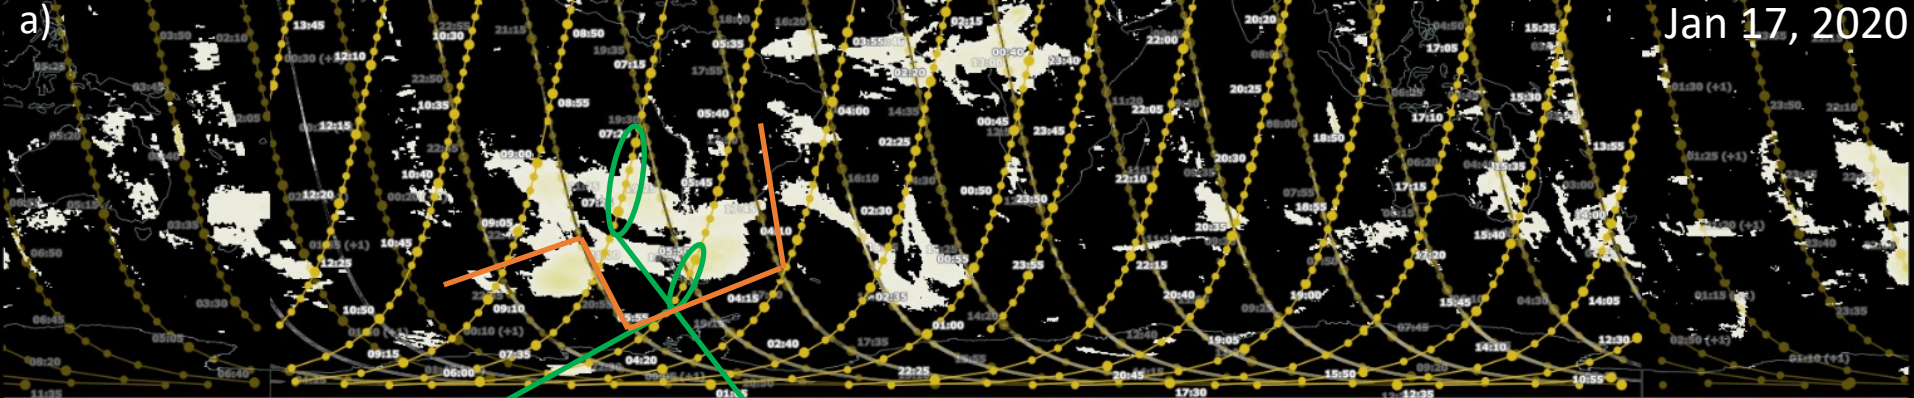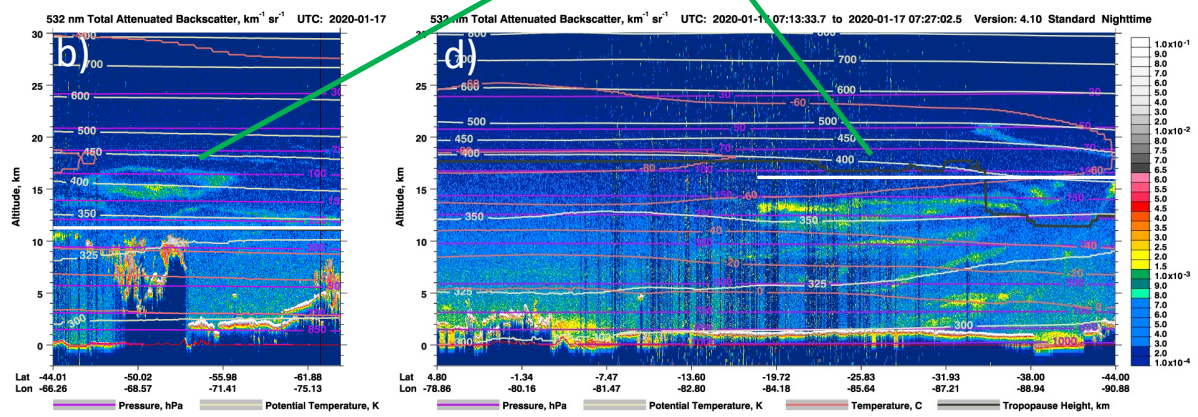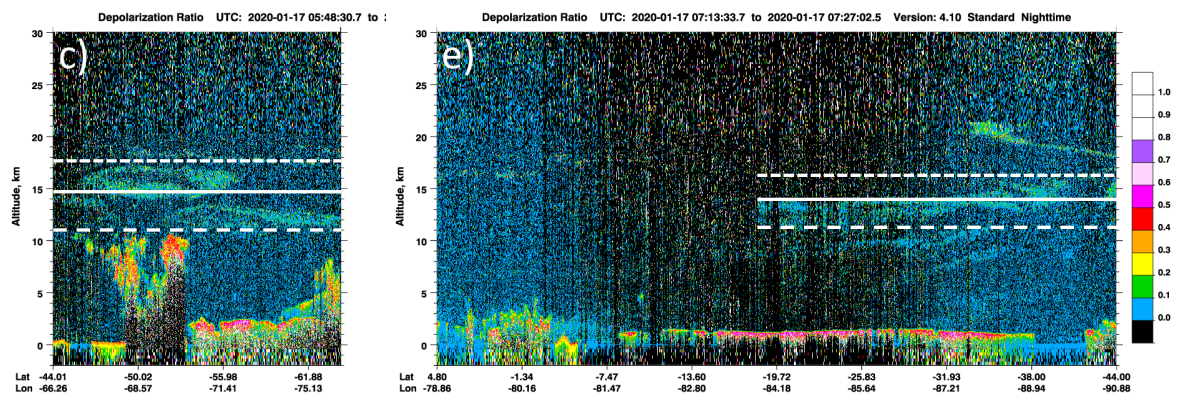

Figure S27. For figure description, see Text S1.

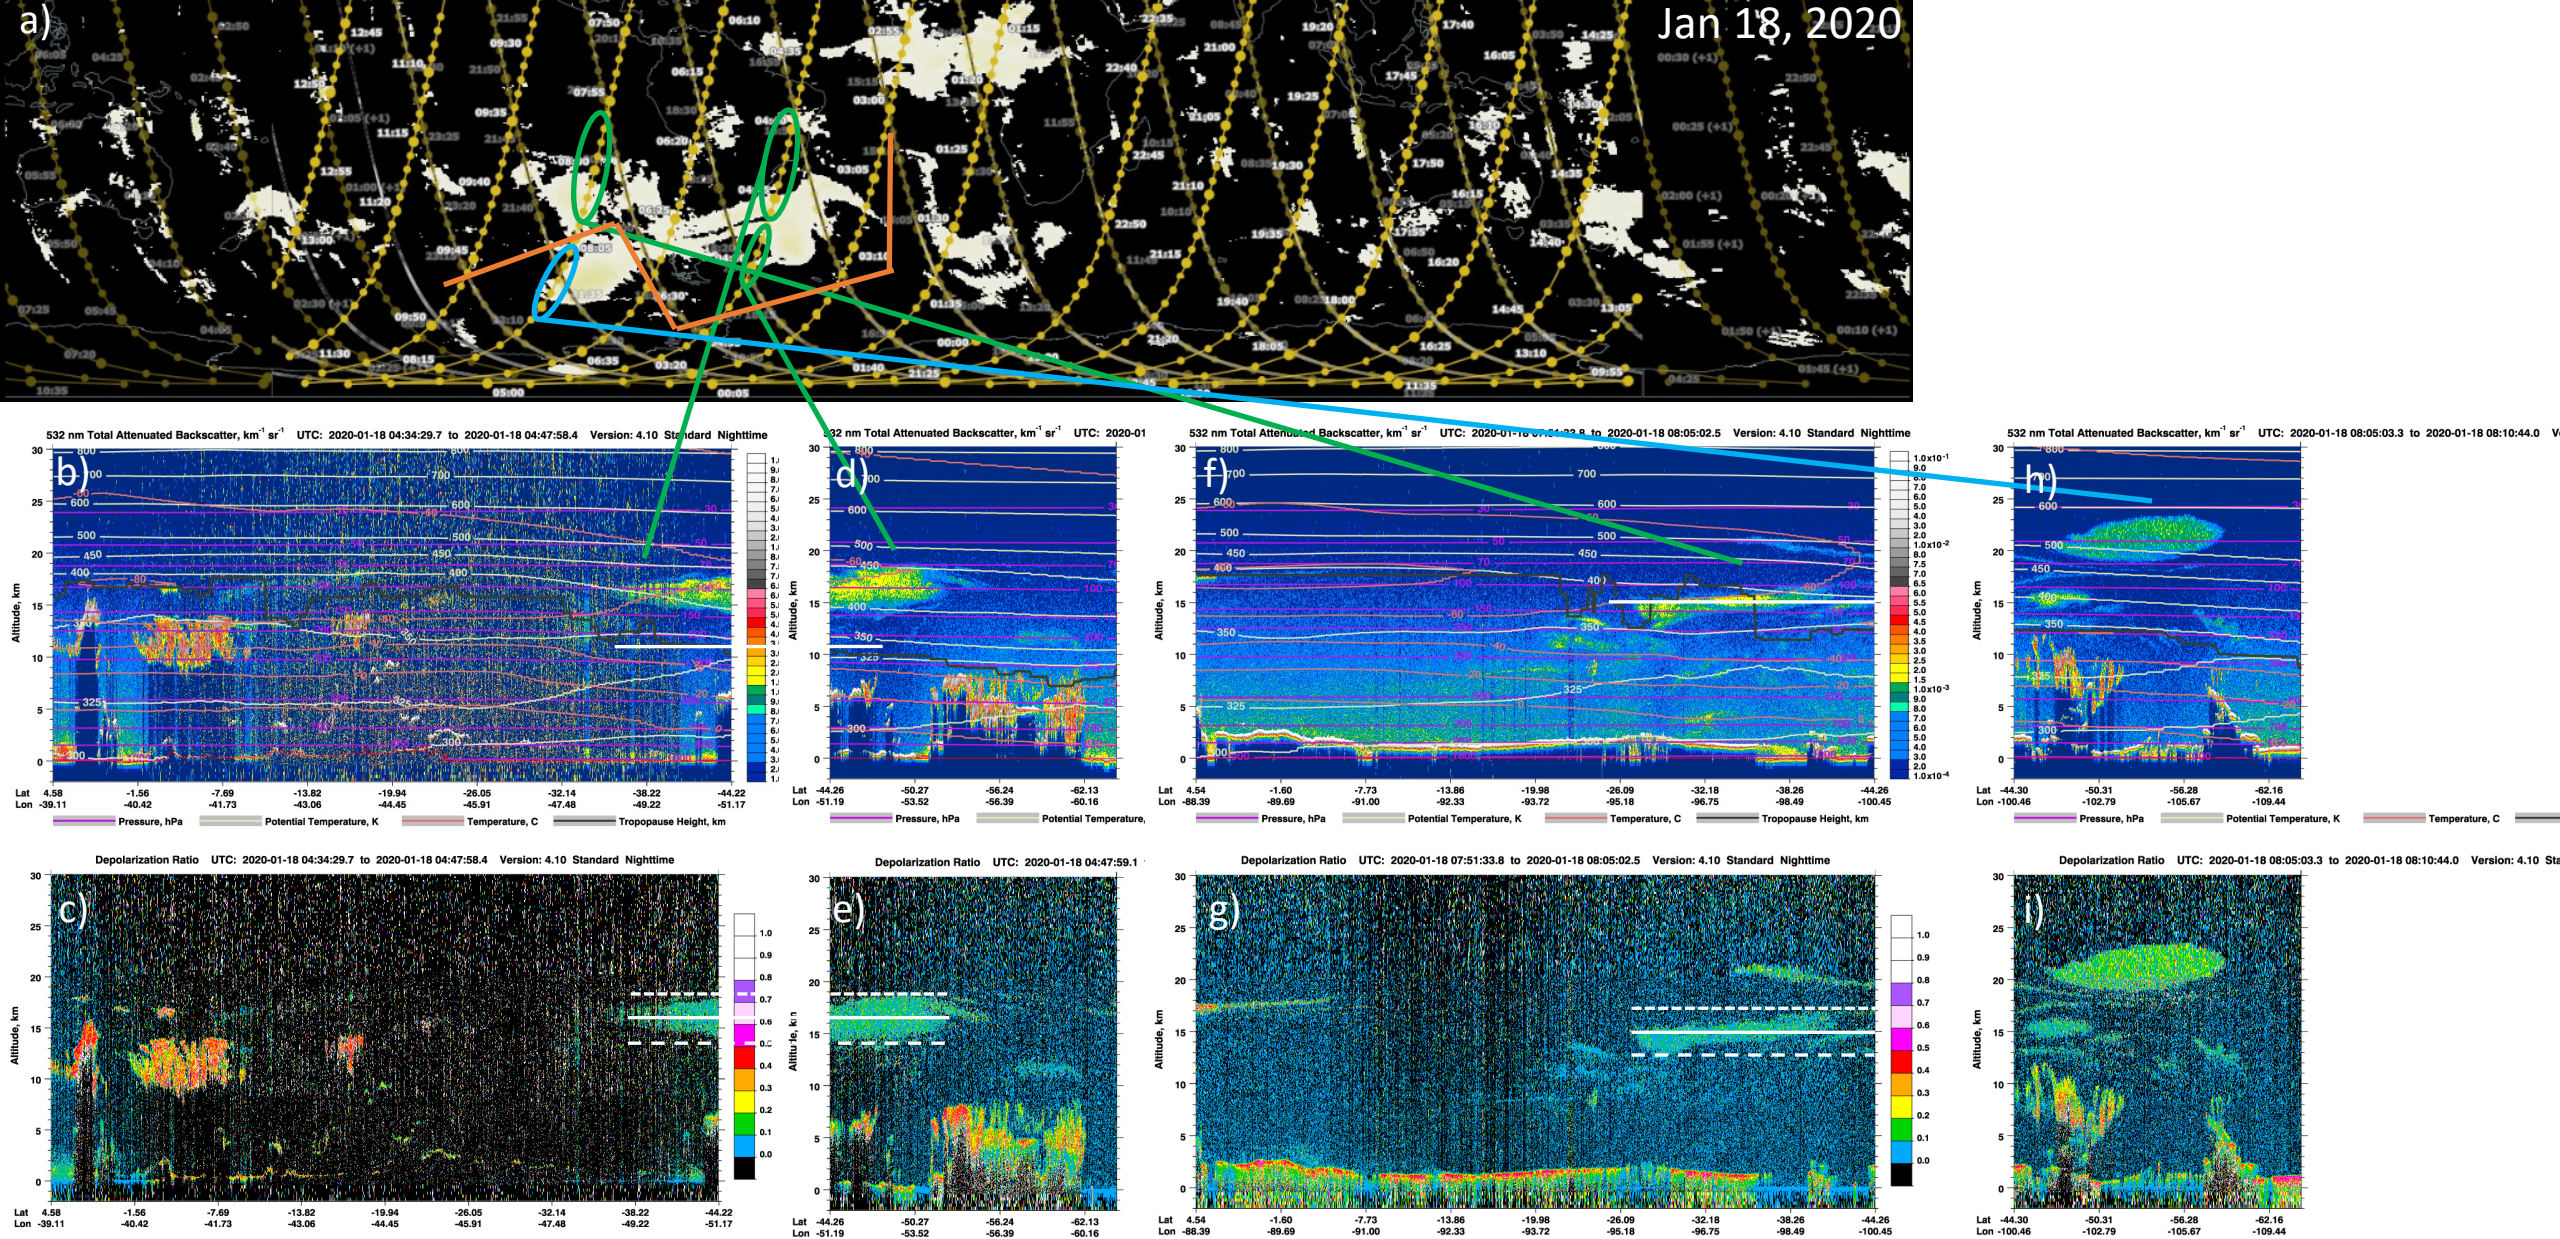

Figure S28. For figure description, see Text S1.

Jan 19, 2020

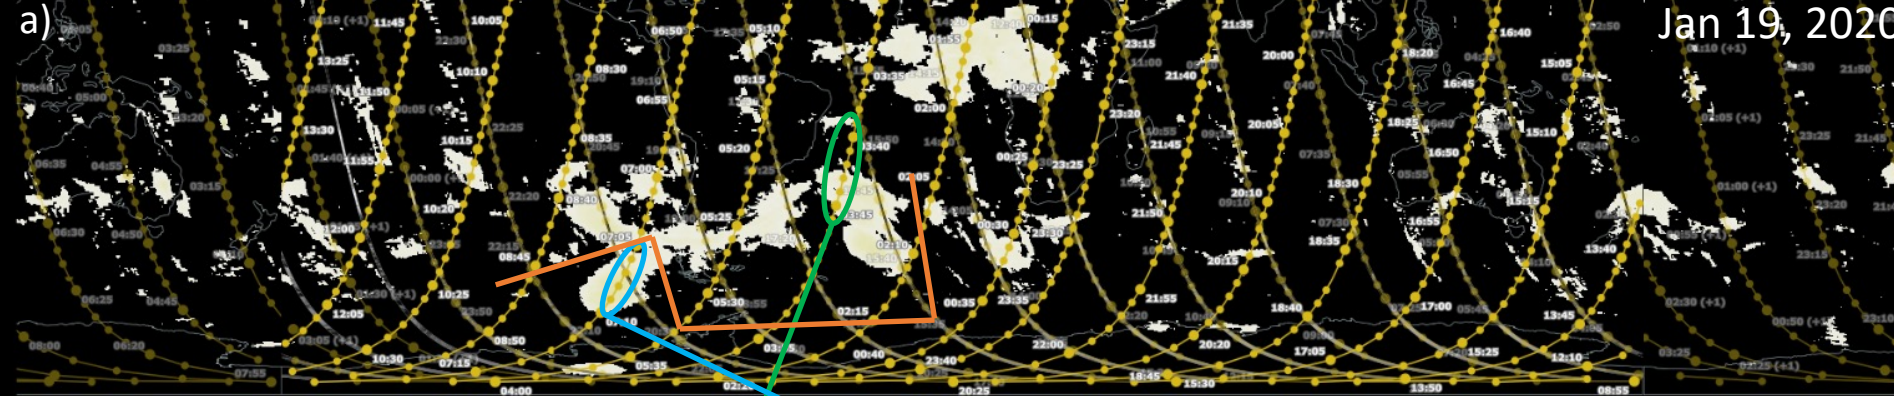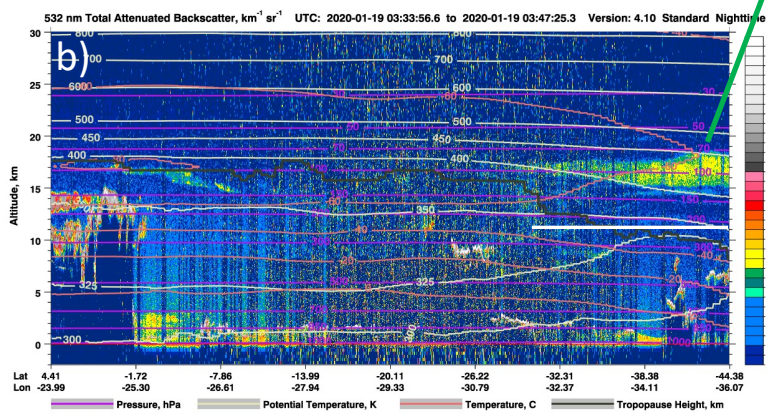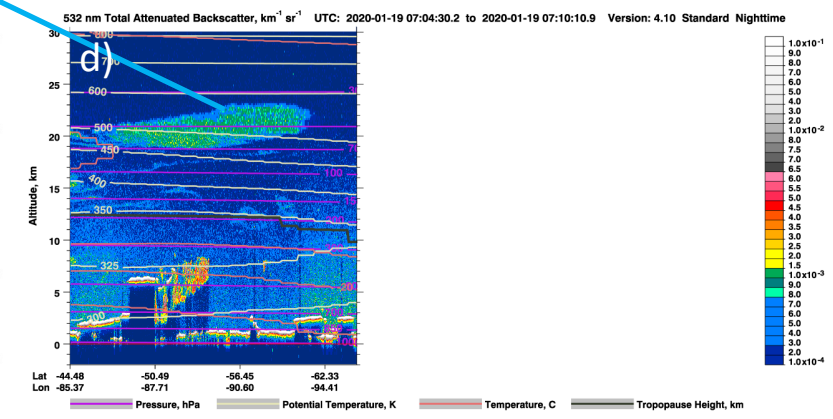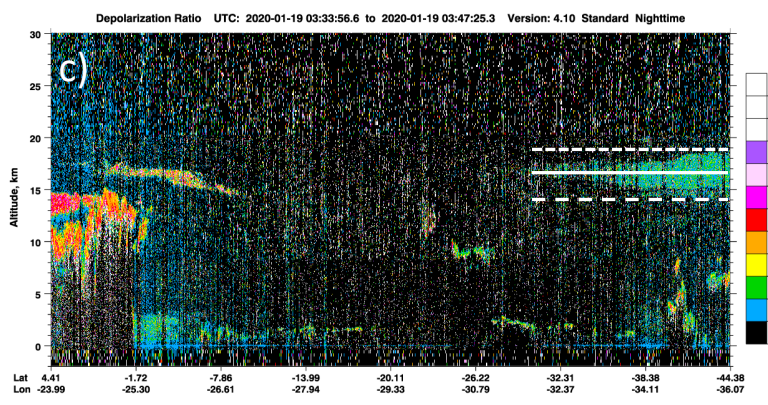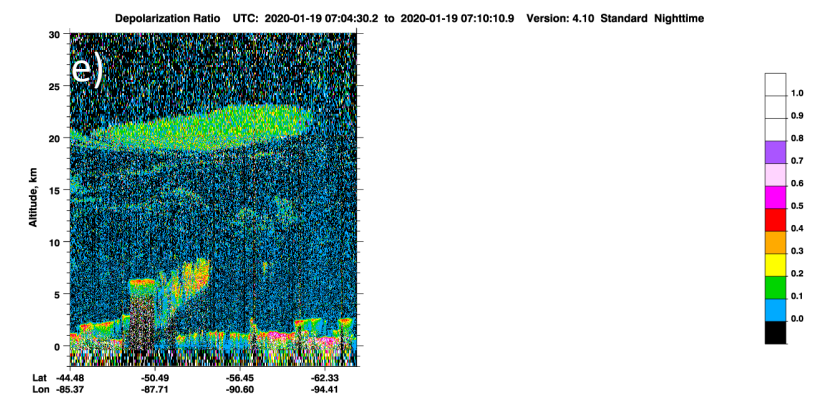

Figure S29. For figure description, see Text S1.



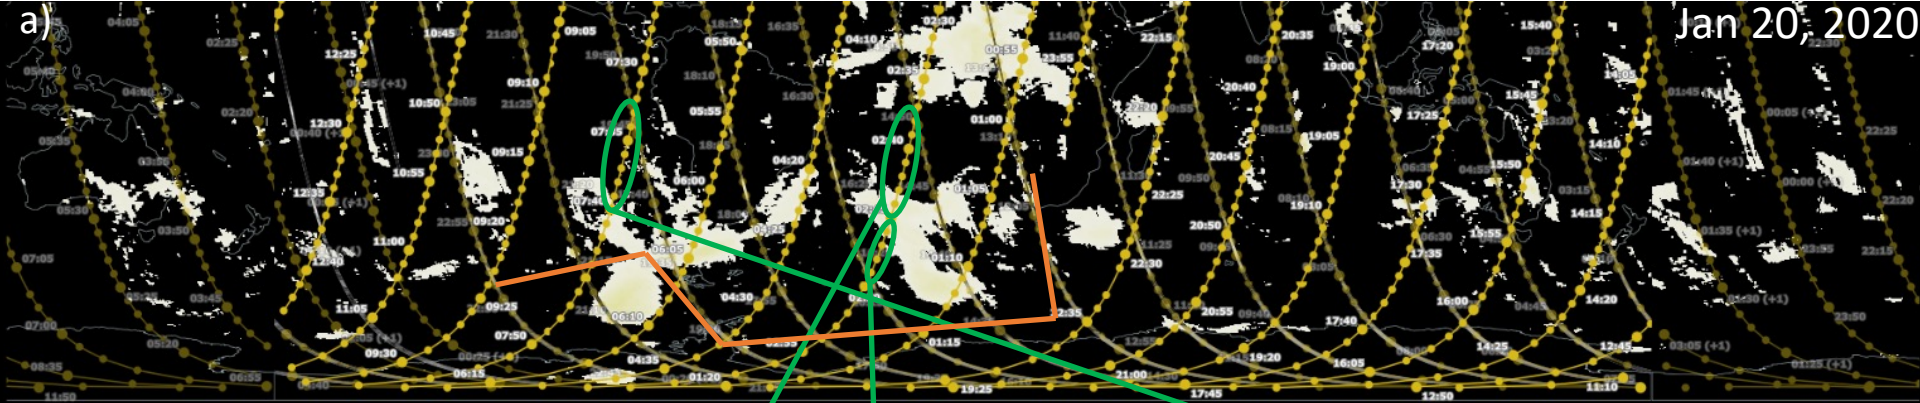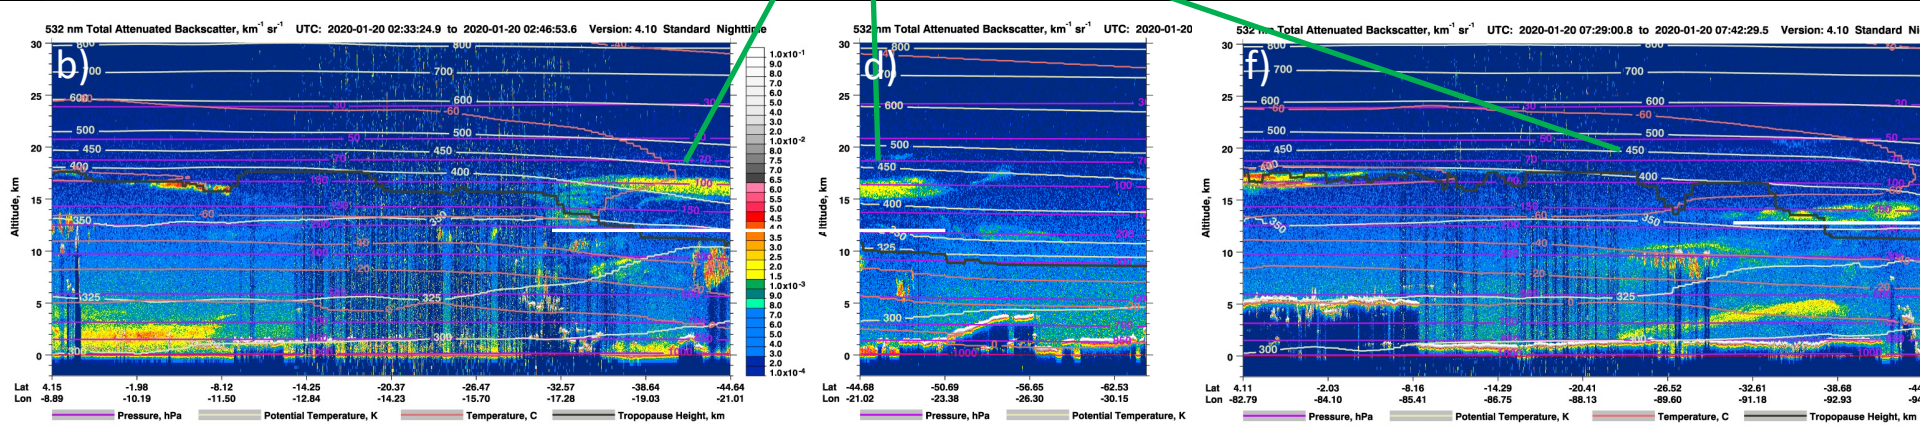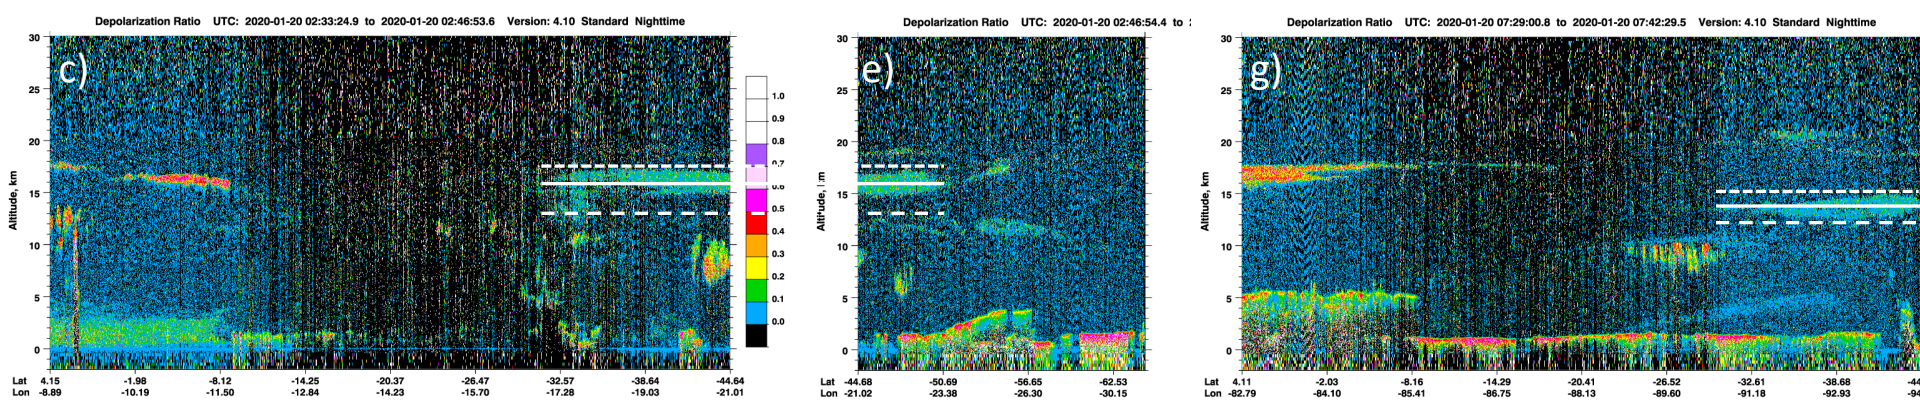

Figure S30. For figure description, see Text S1.

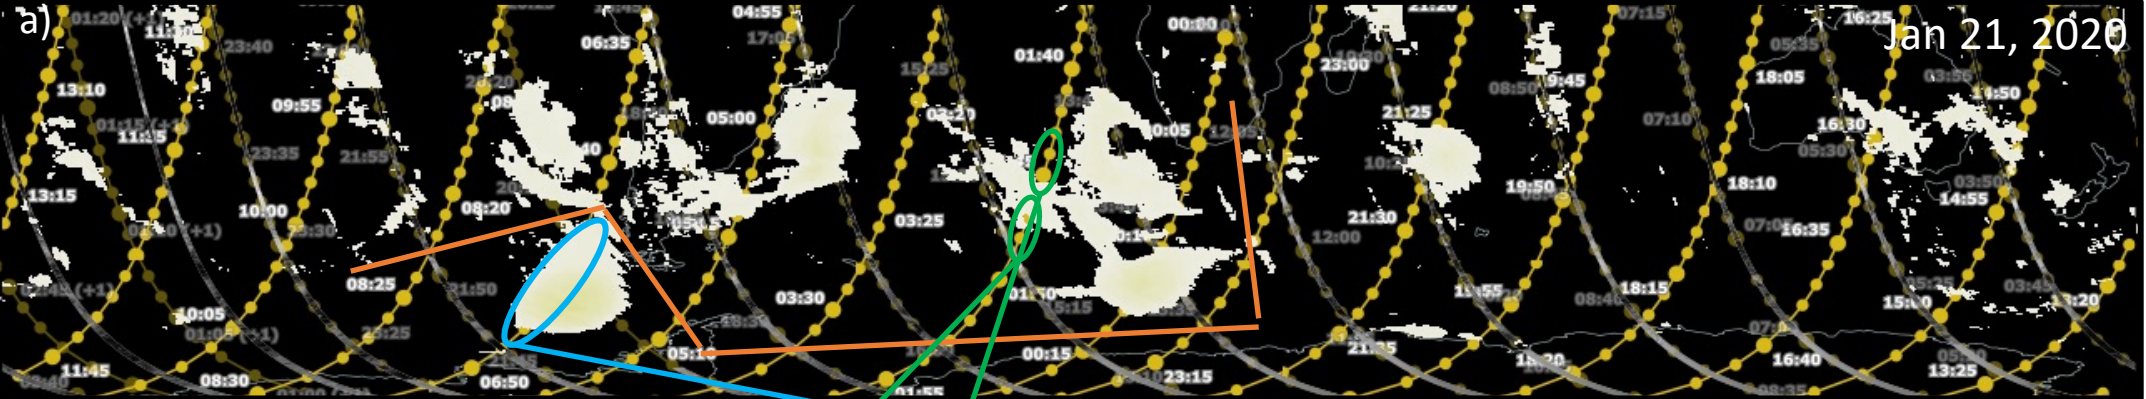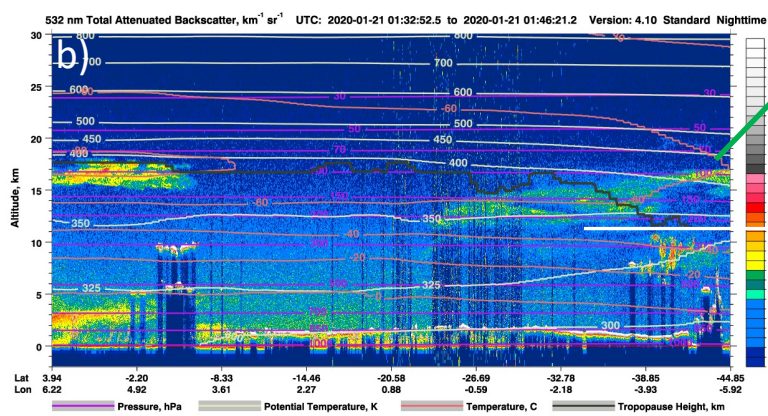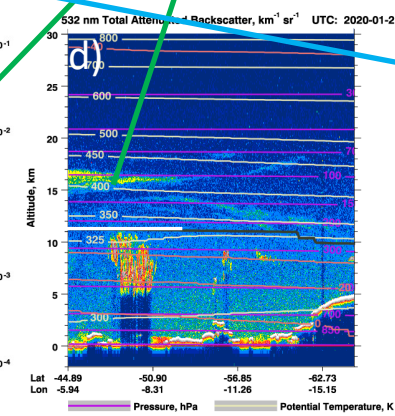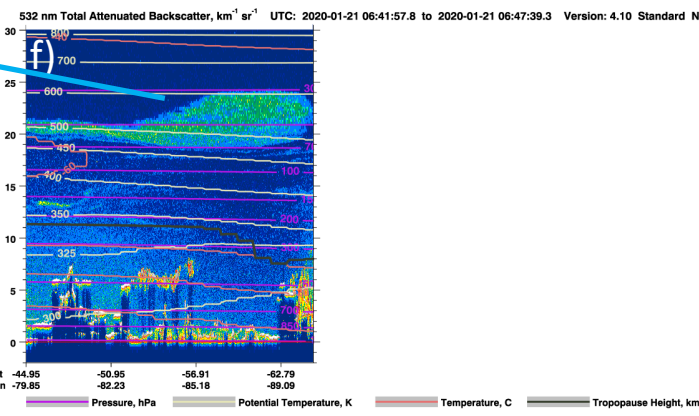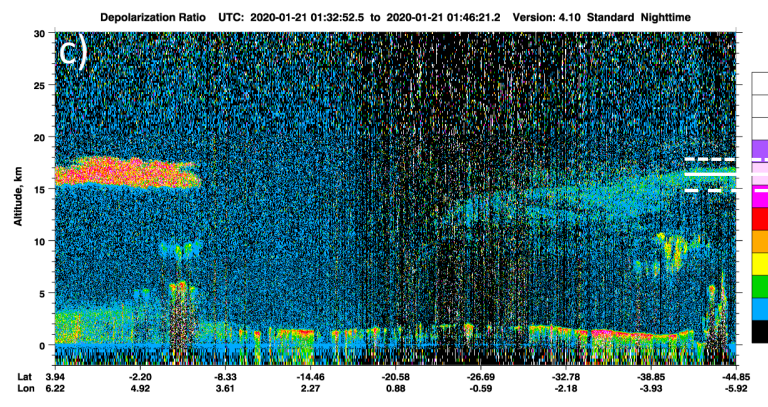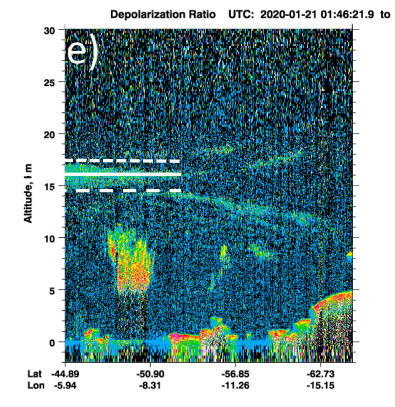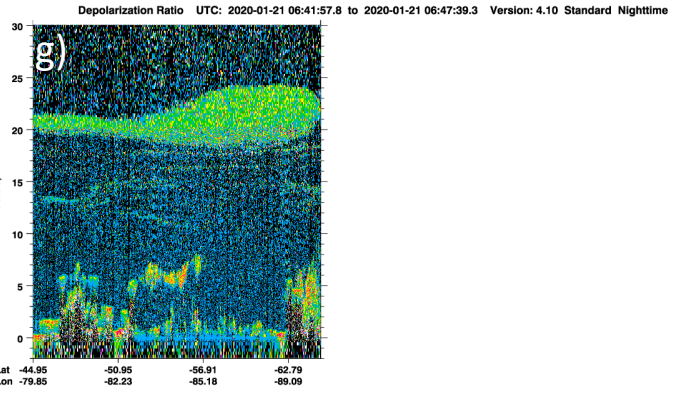

Figure S31. For figure description, see Text S1.

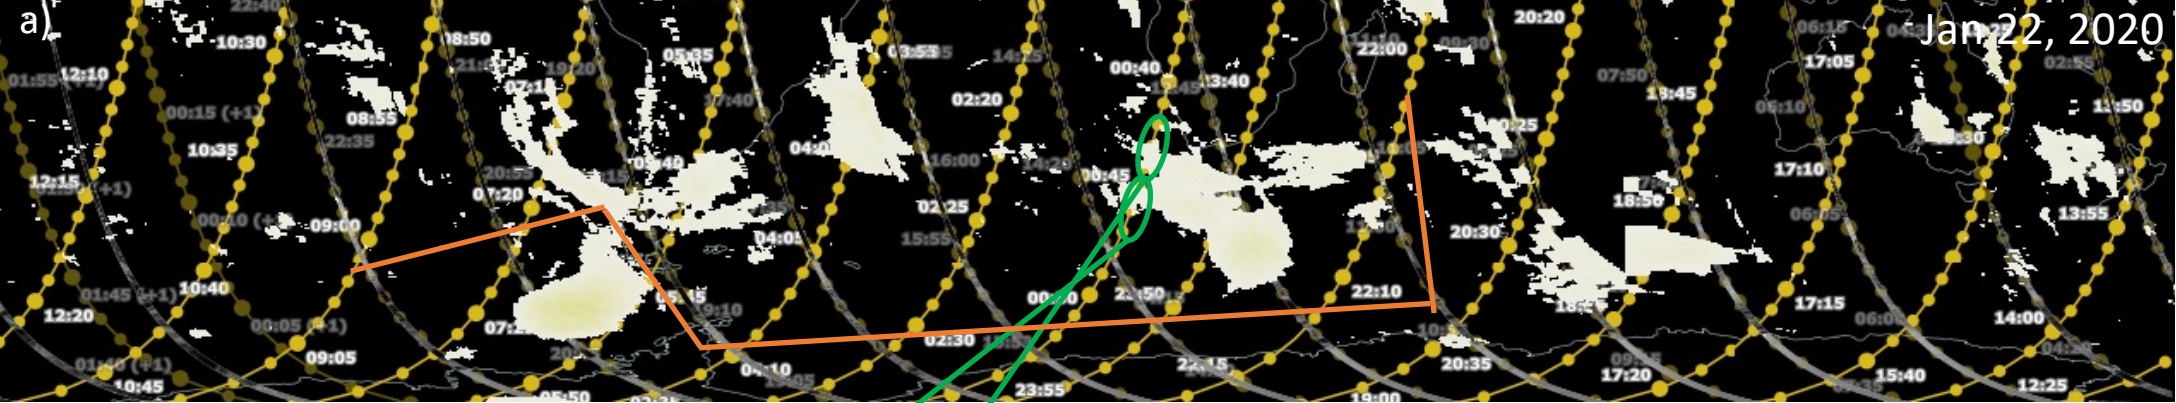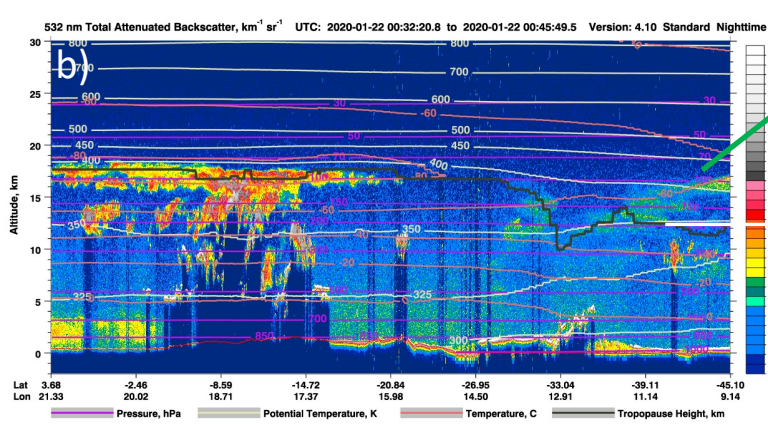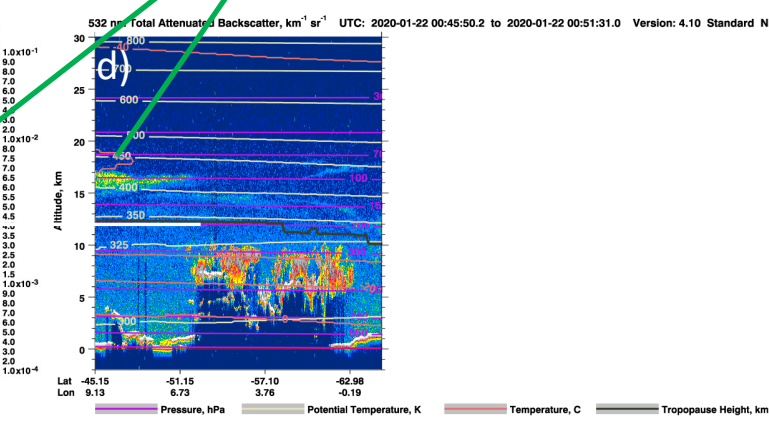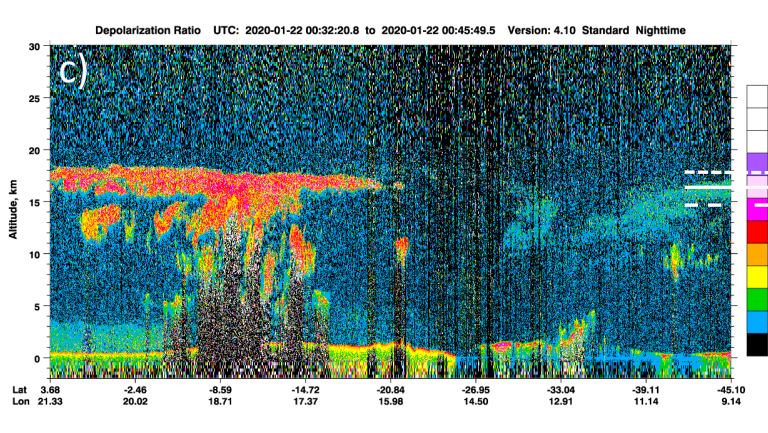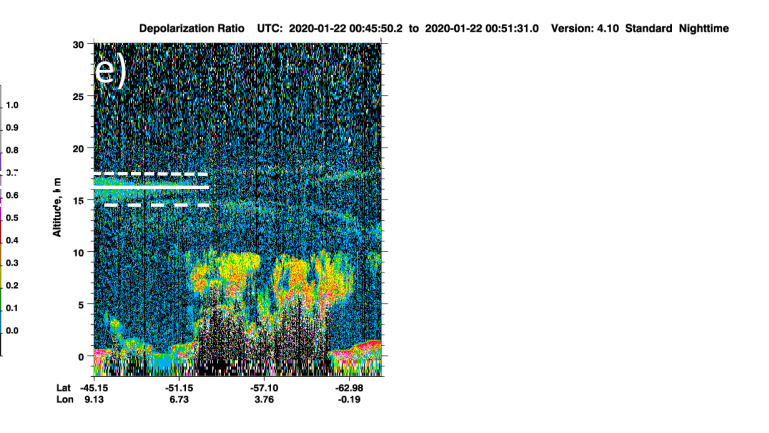

Figure S32. For figure description, see Text S1.

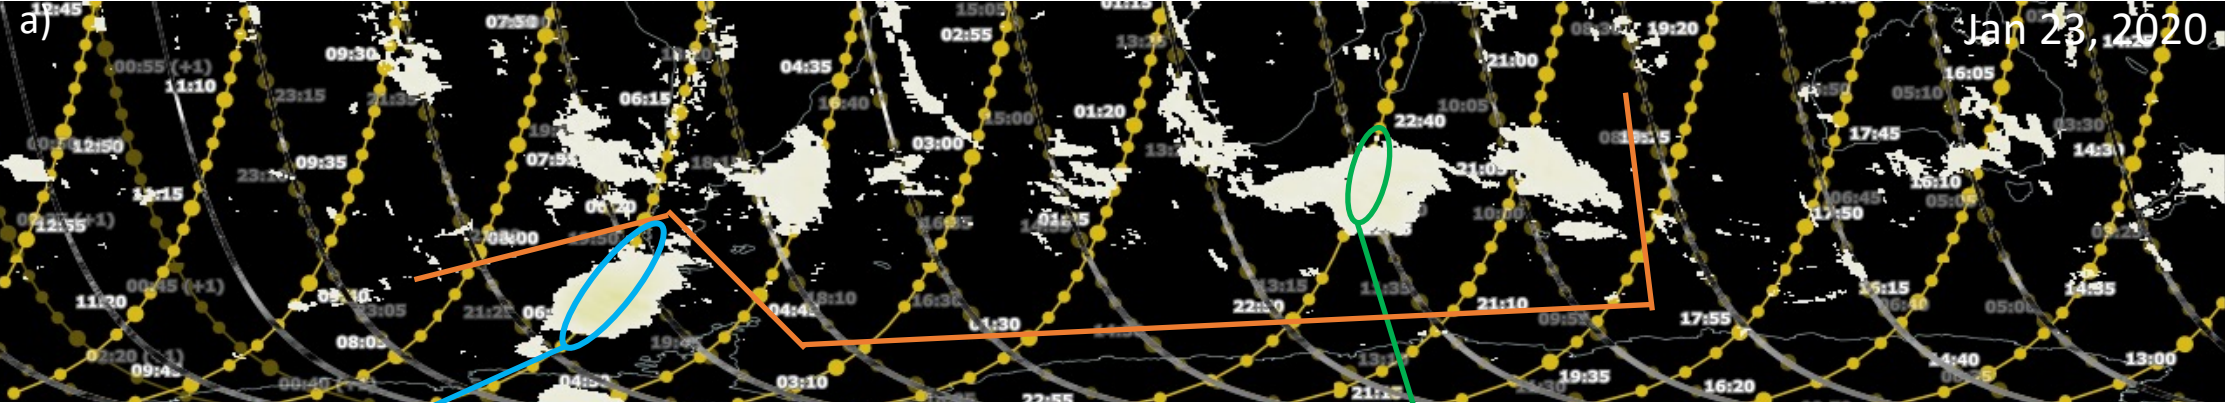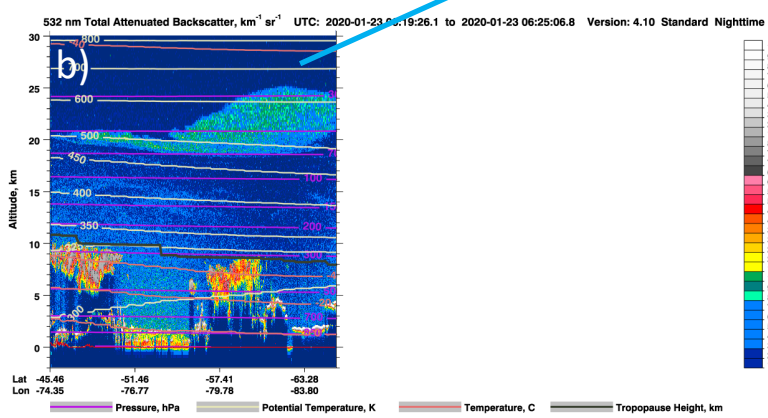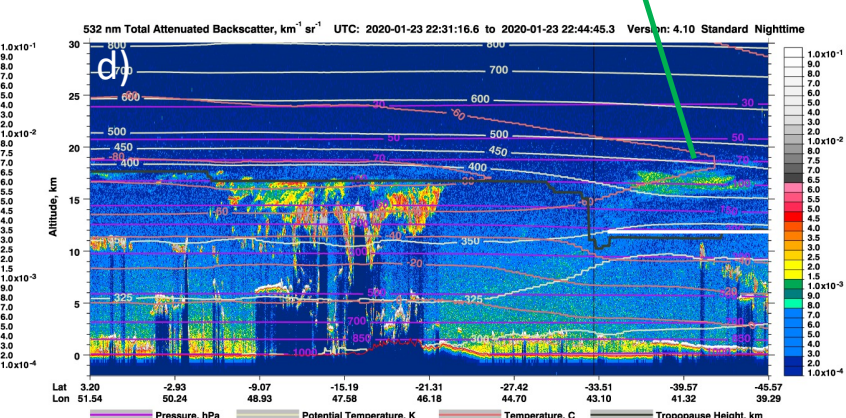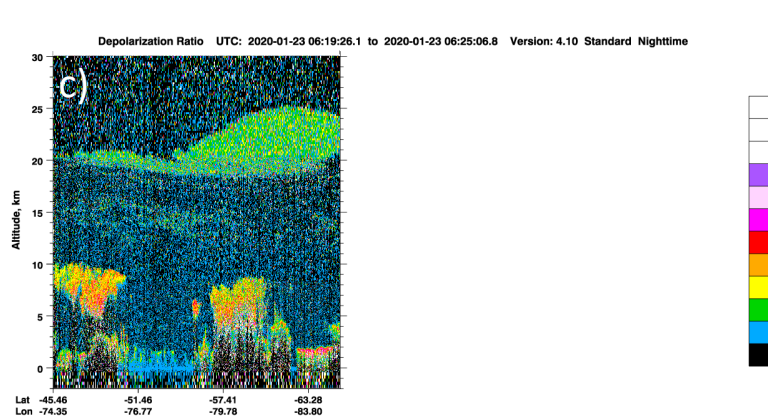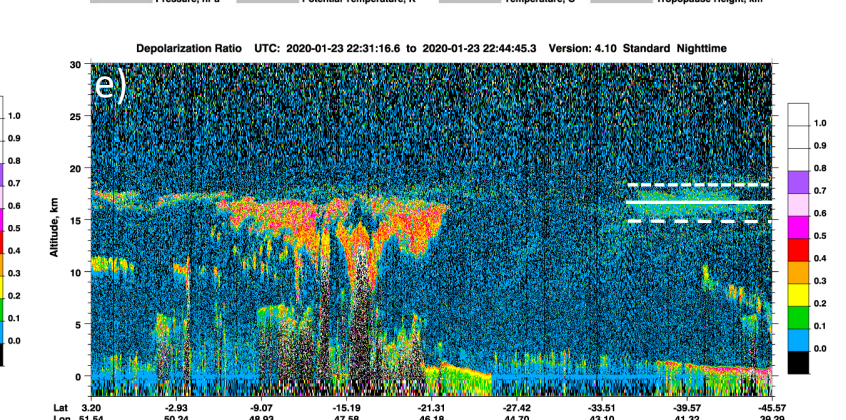

Figure S33. For figure description, see Text S1.

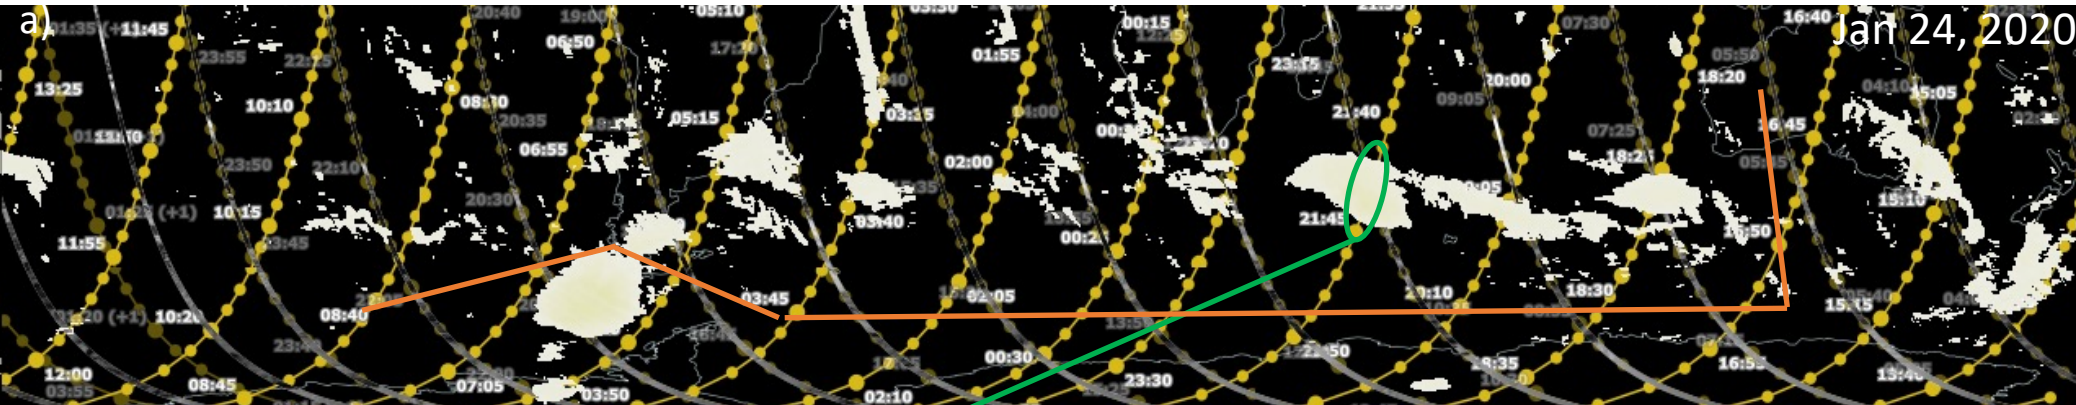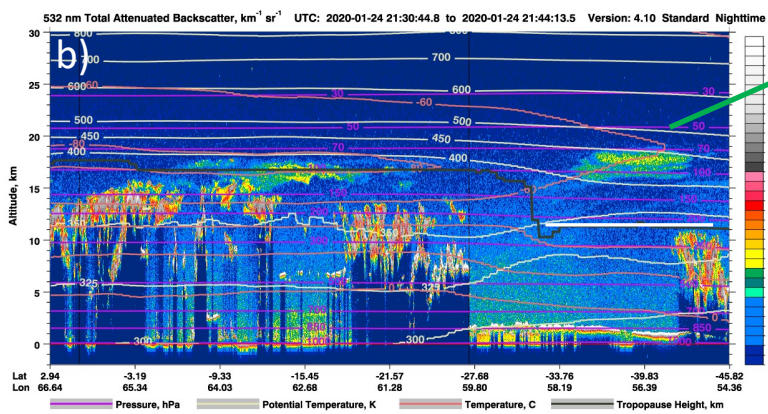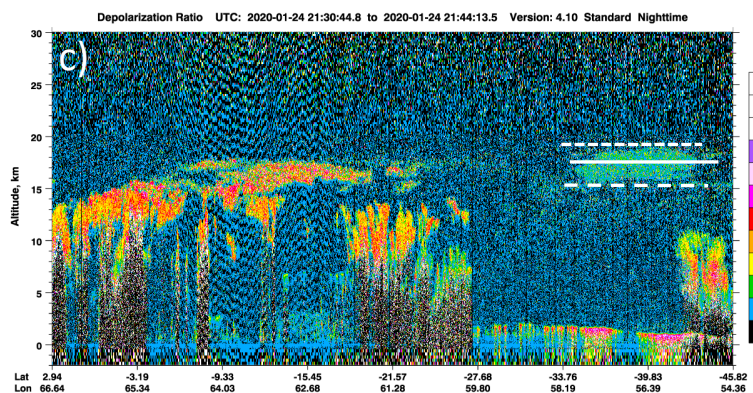

Figure S34. For figure description, see Text S1.

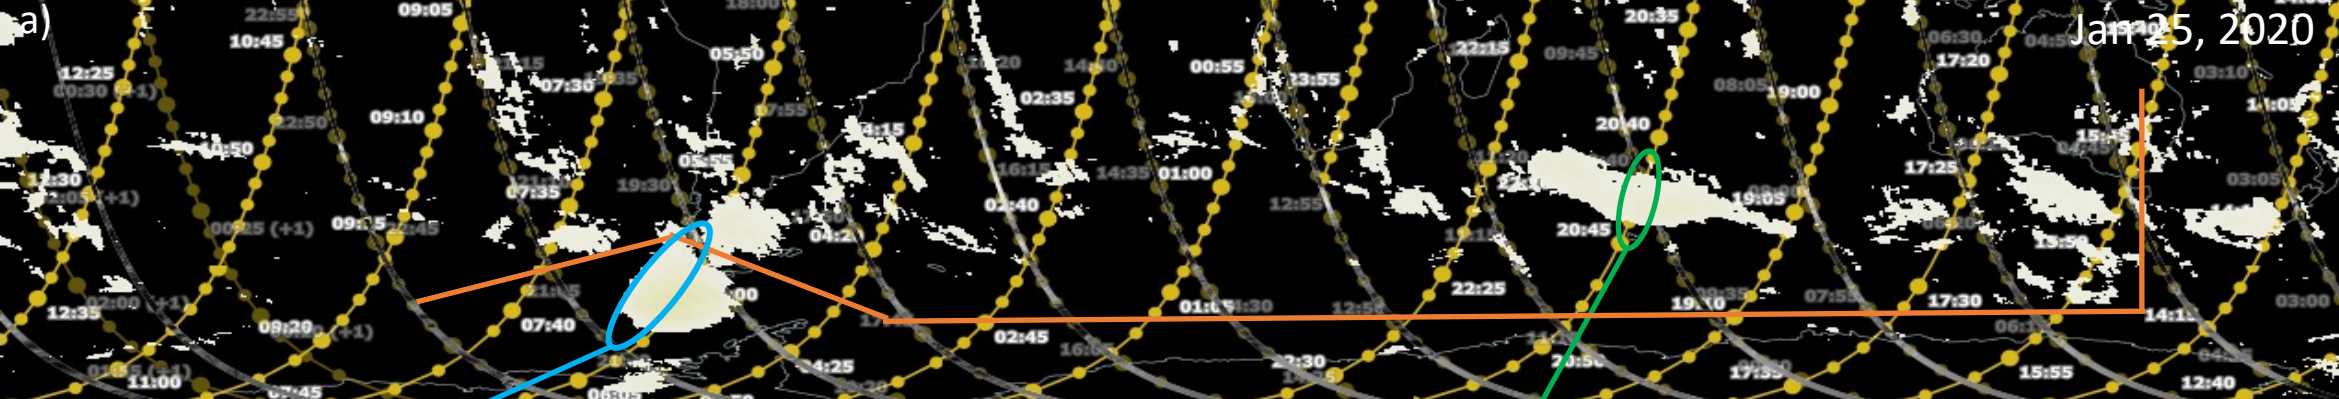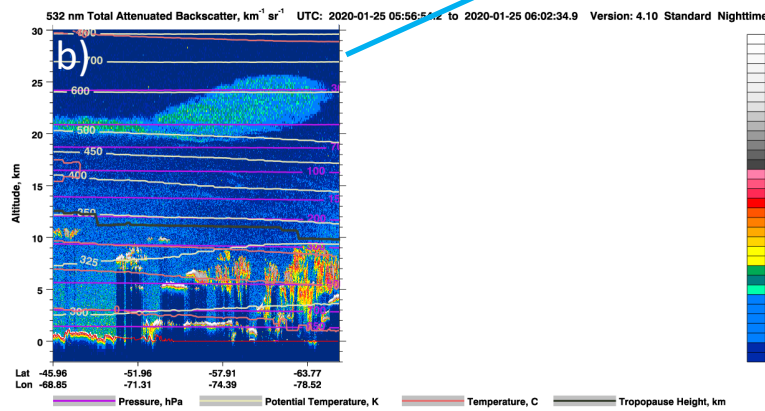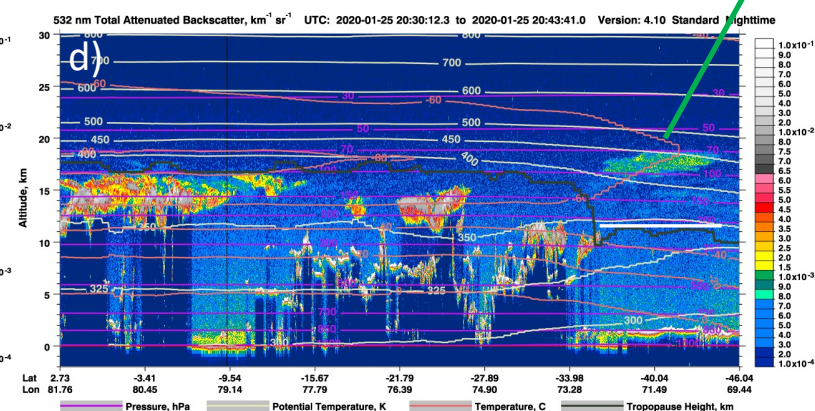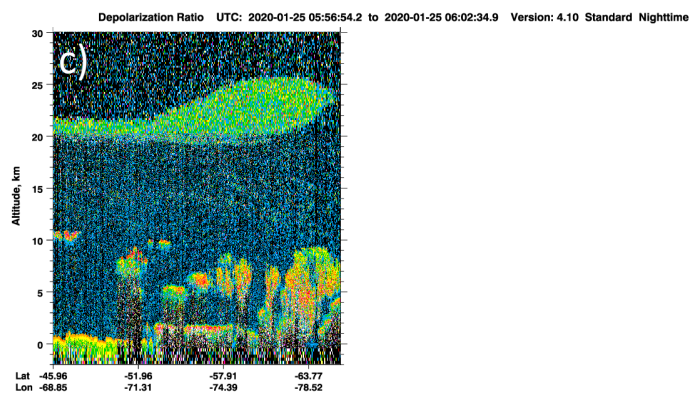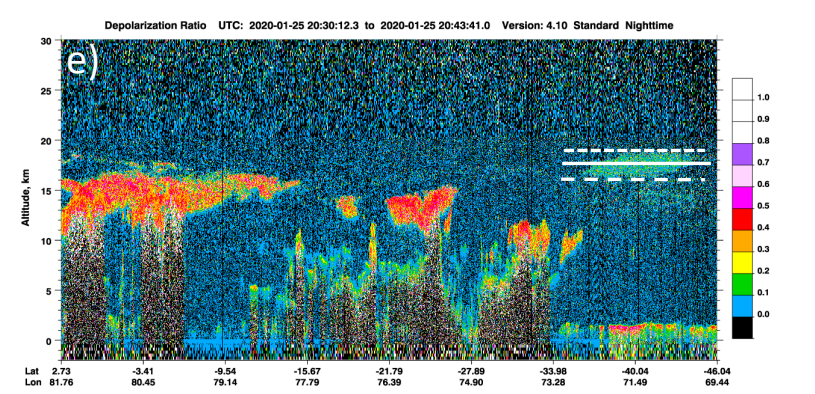

Figure S35. For figure description, see Text S1.

Jan 27, 2020

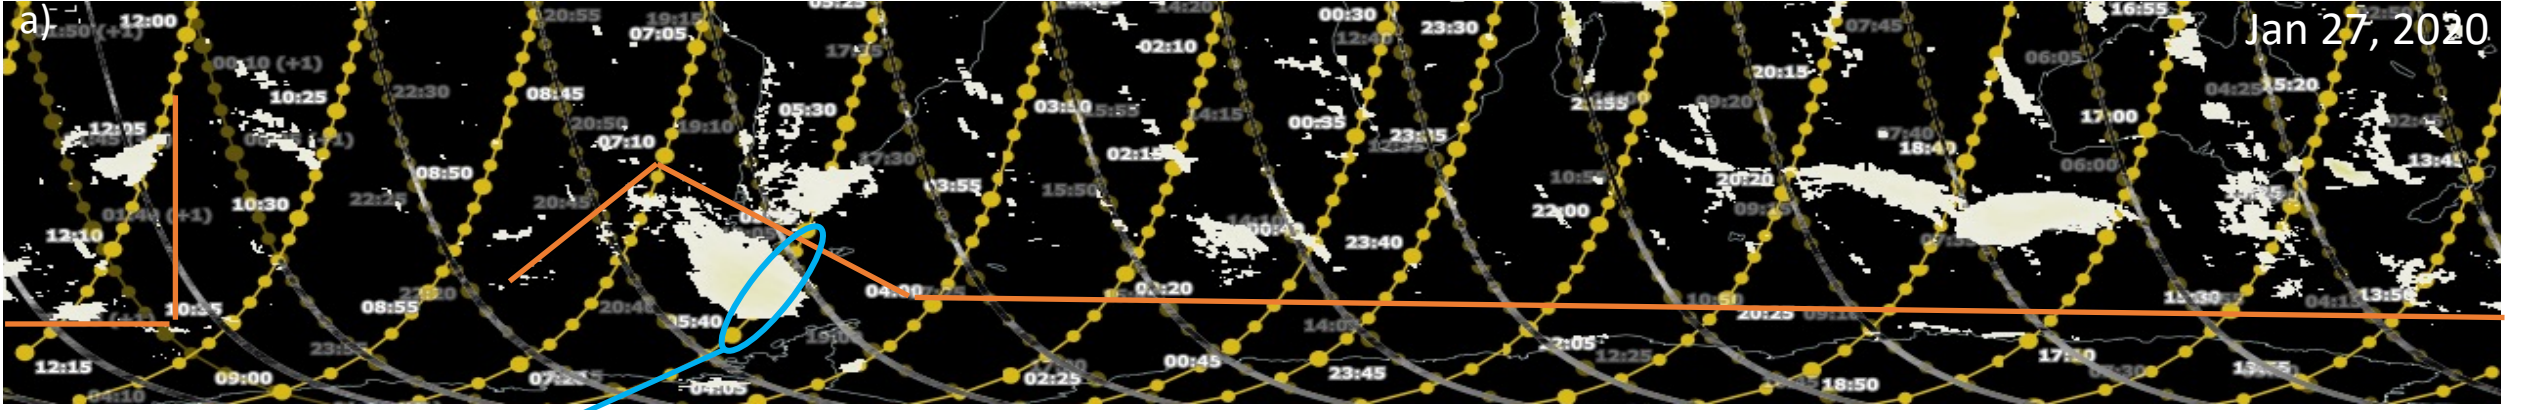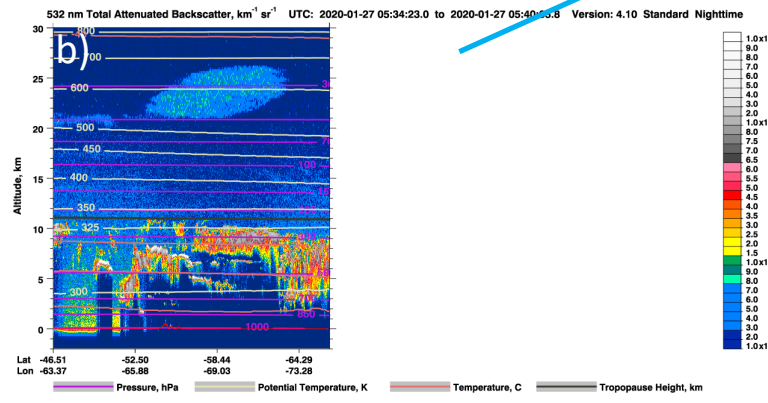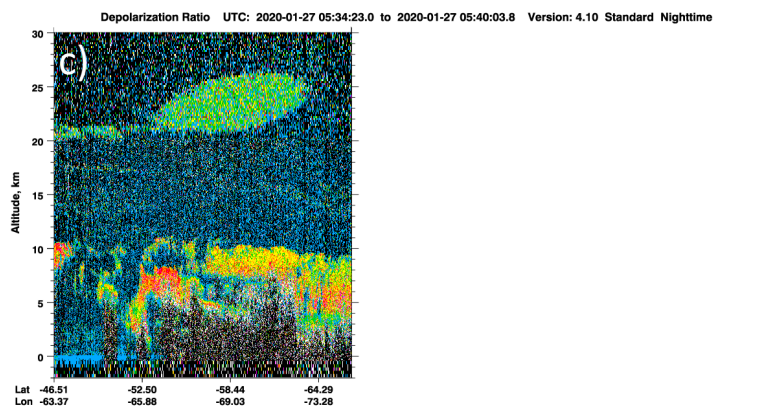

Figure S36. For figure description, see Text S1.

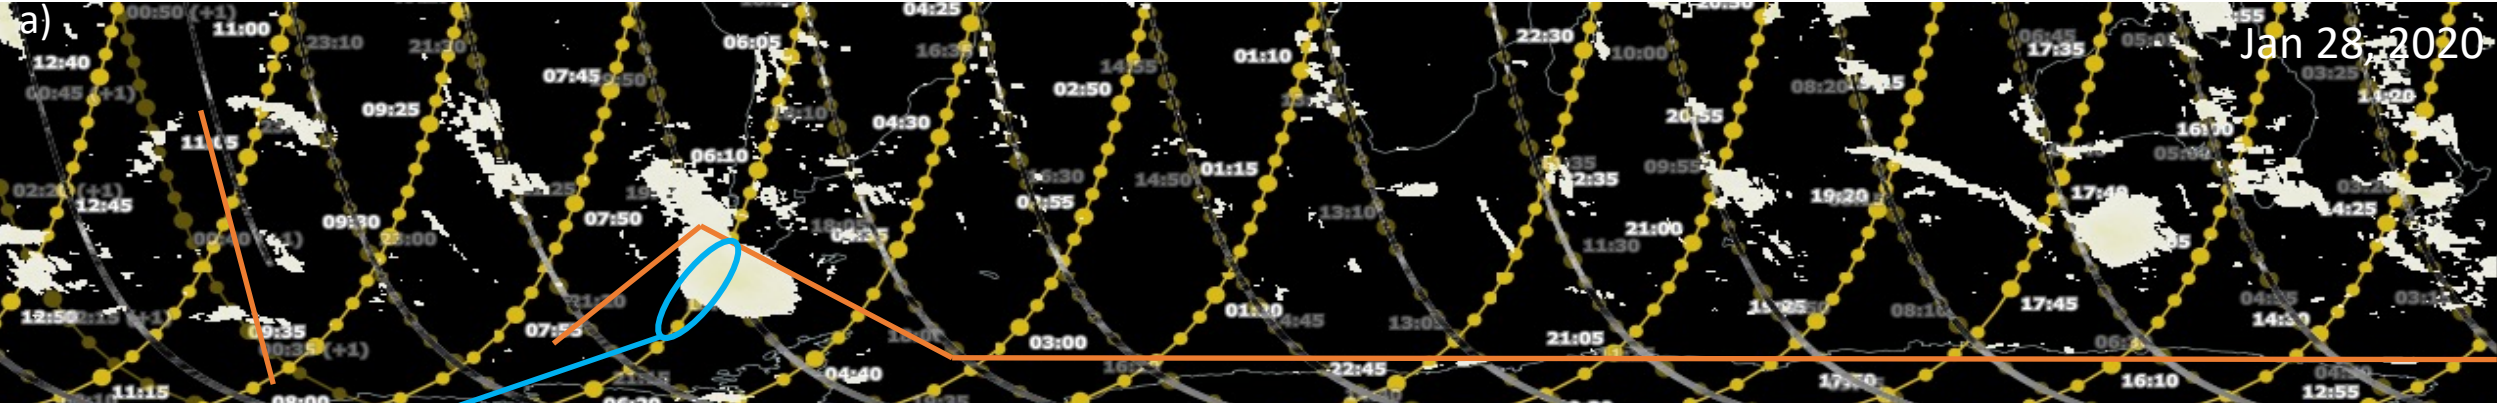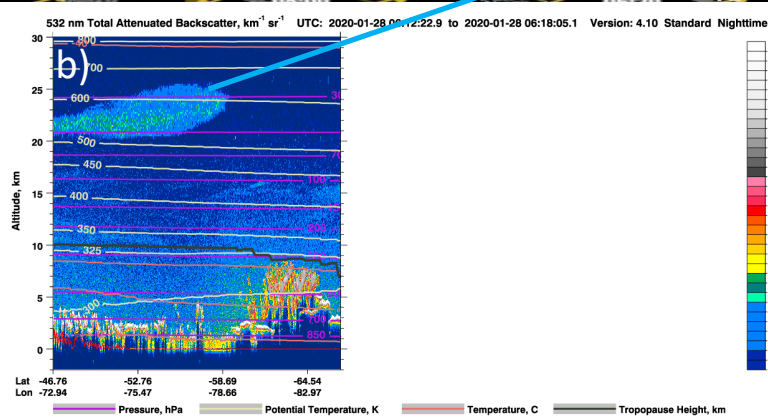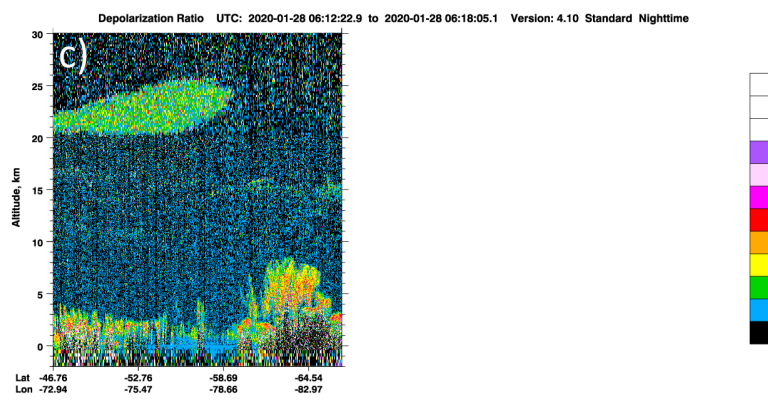

Figure S37. For figure description, see Text S1.



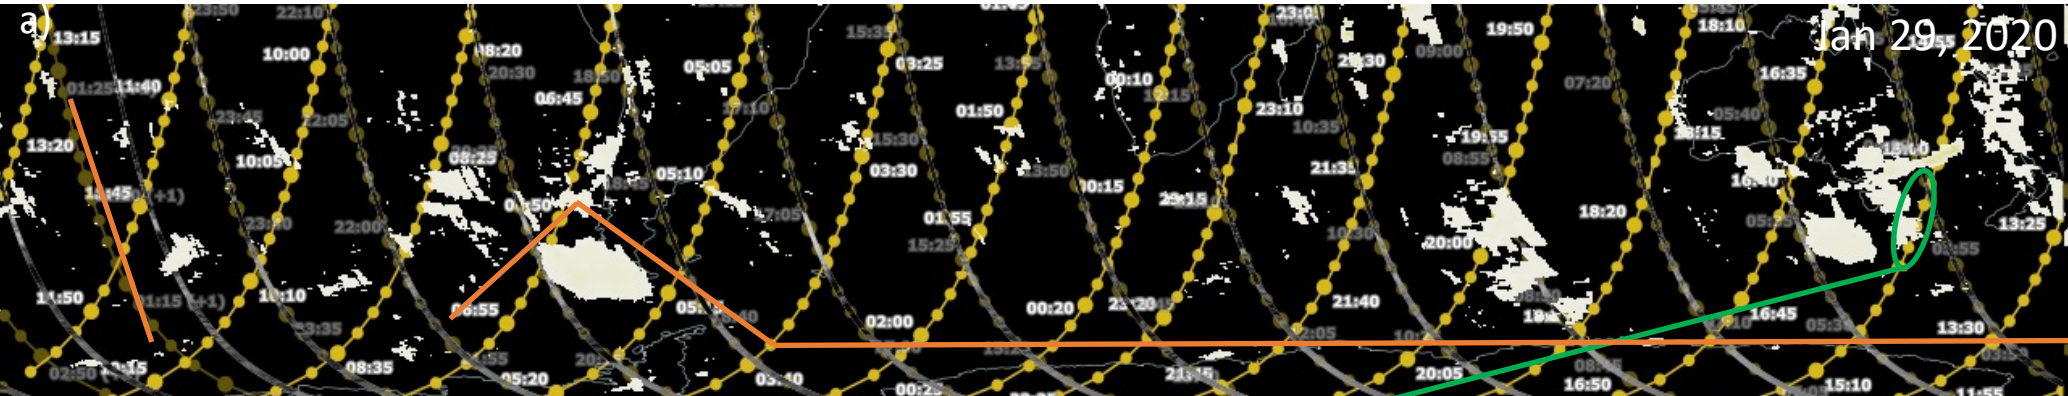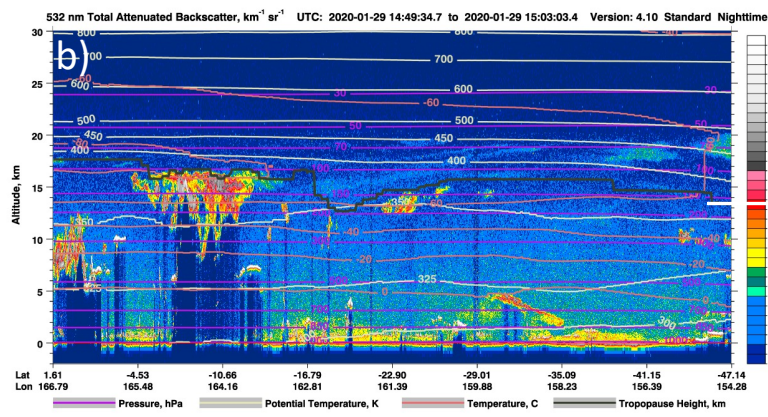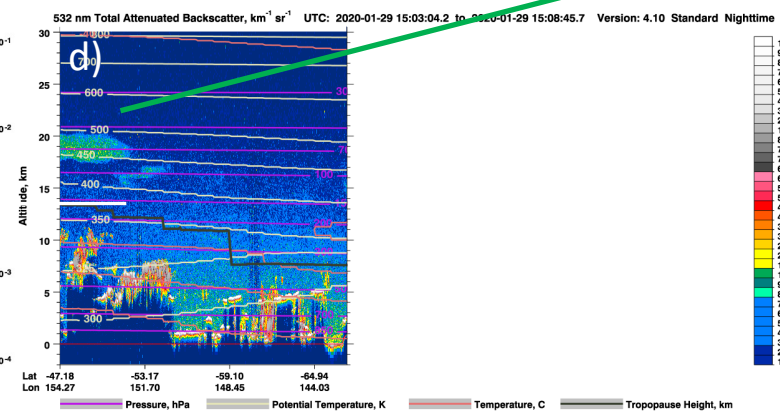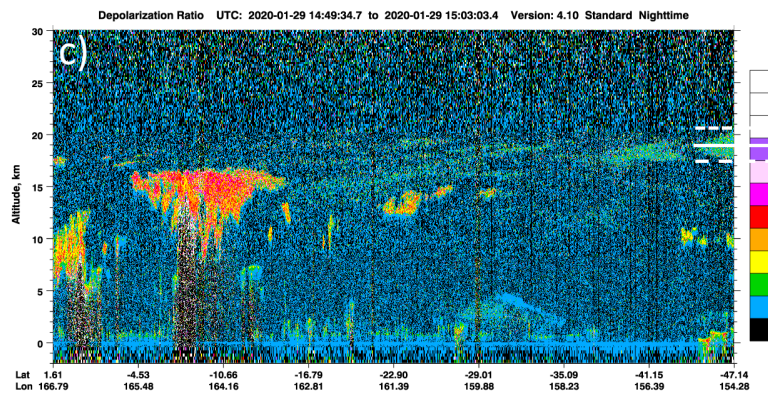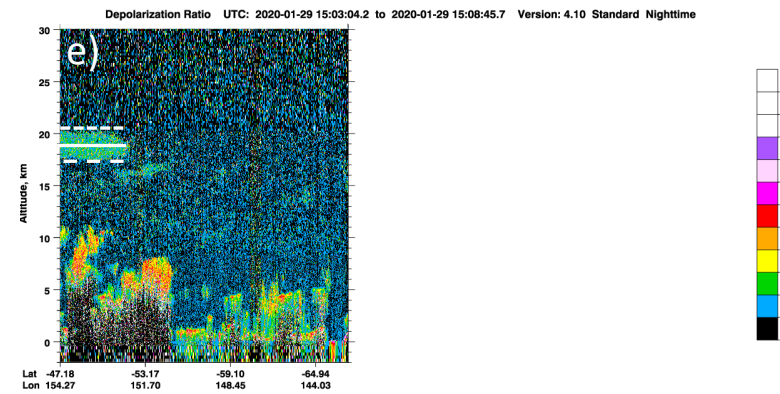

Figure S38. For figure description, see Text S1.

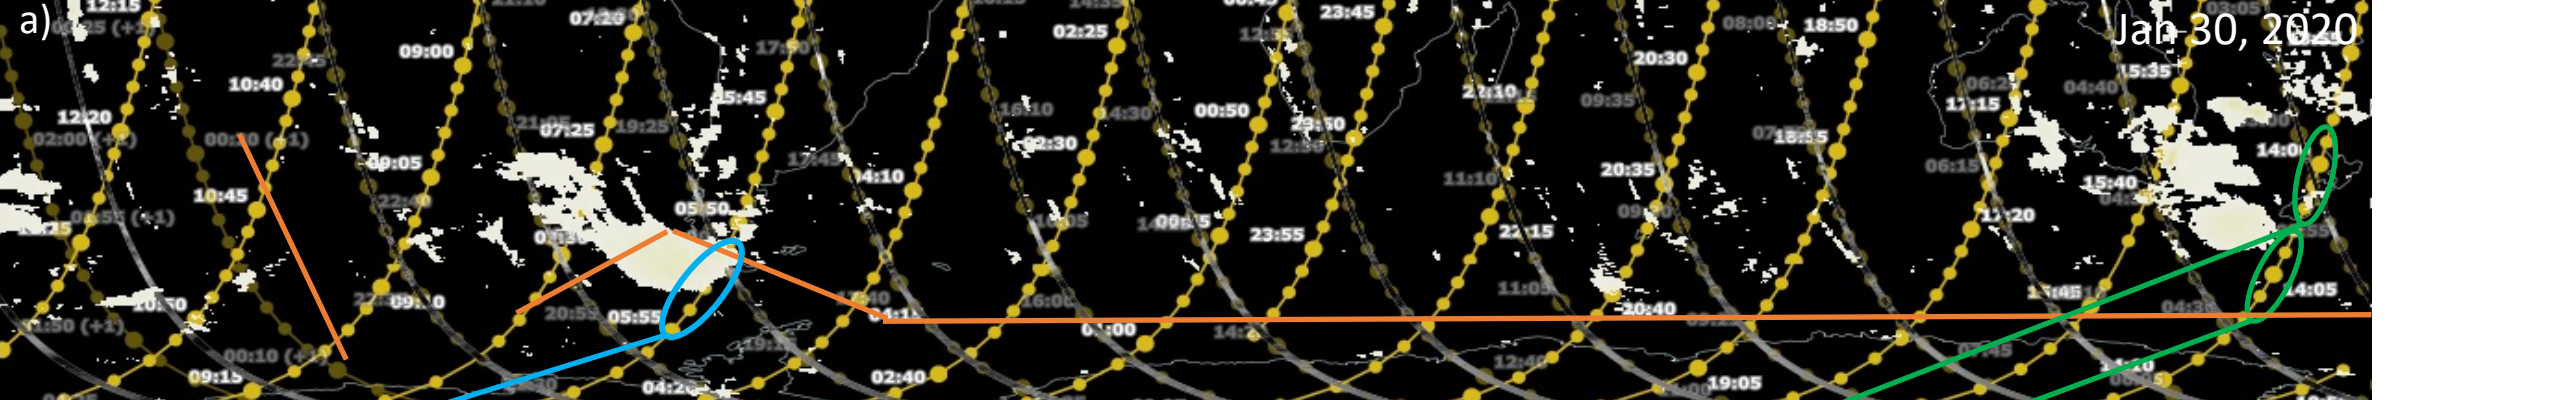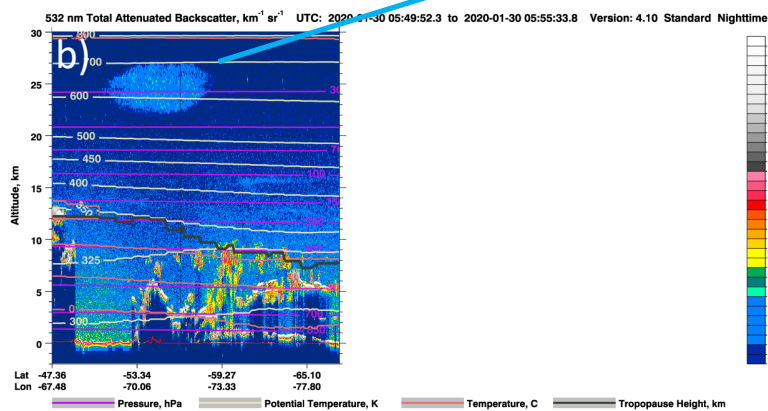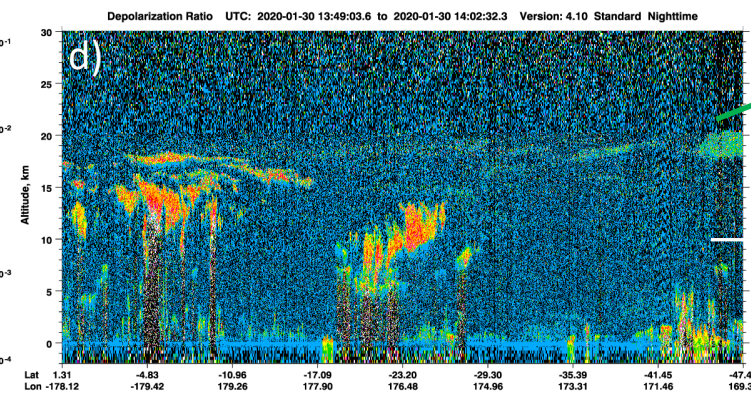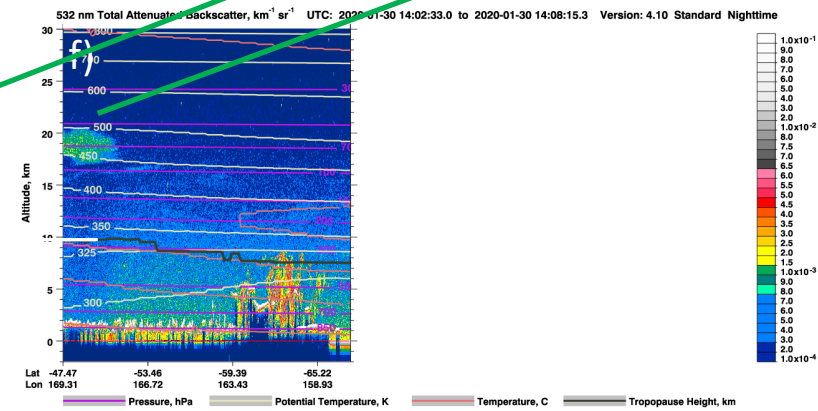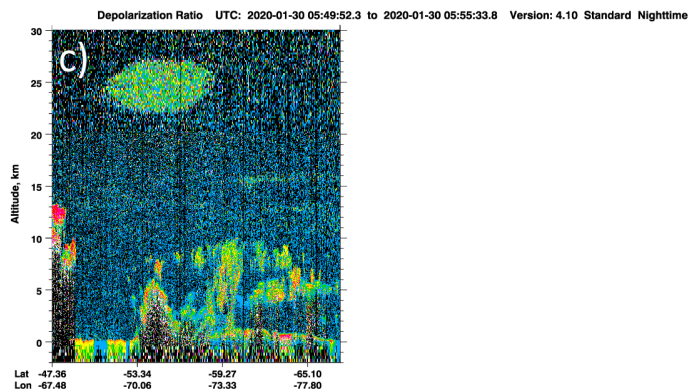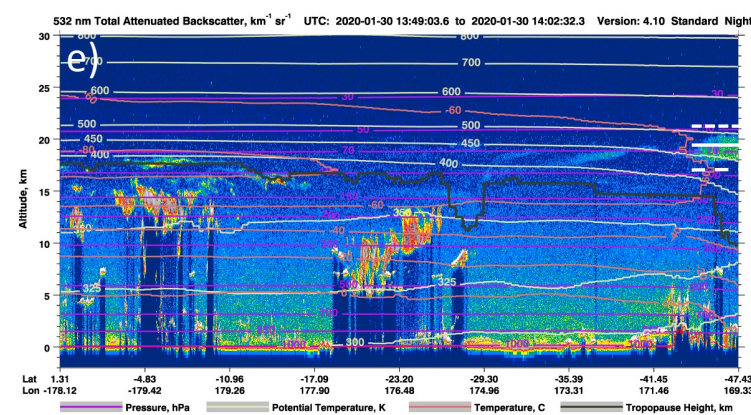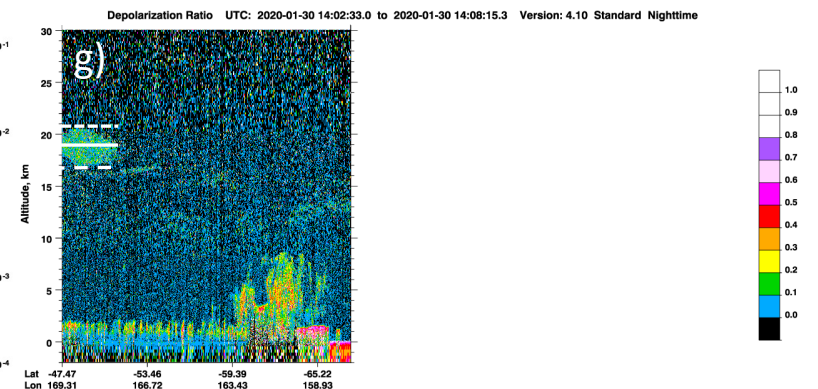

Figure S39. For figure description, see Text S1.

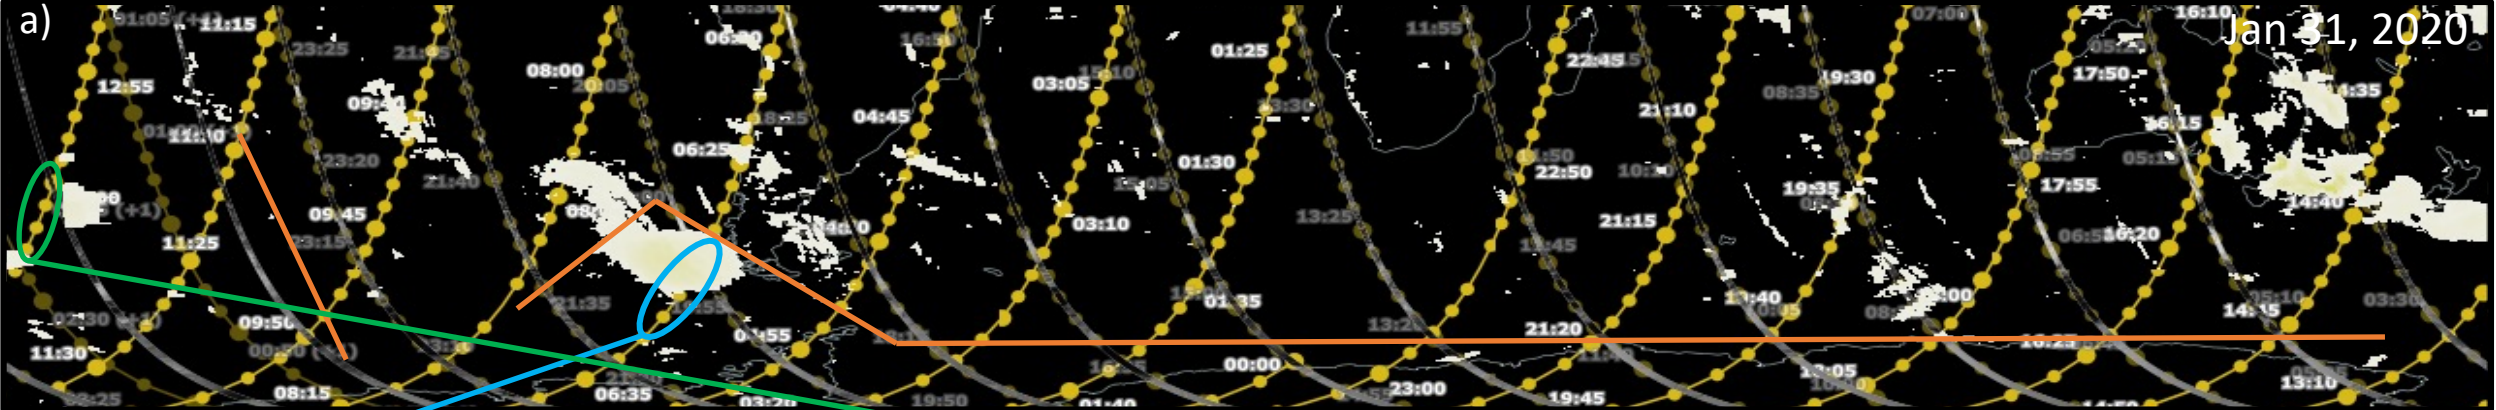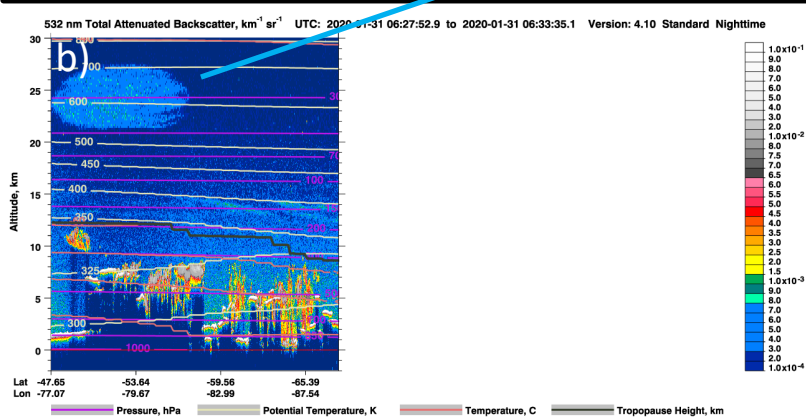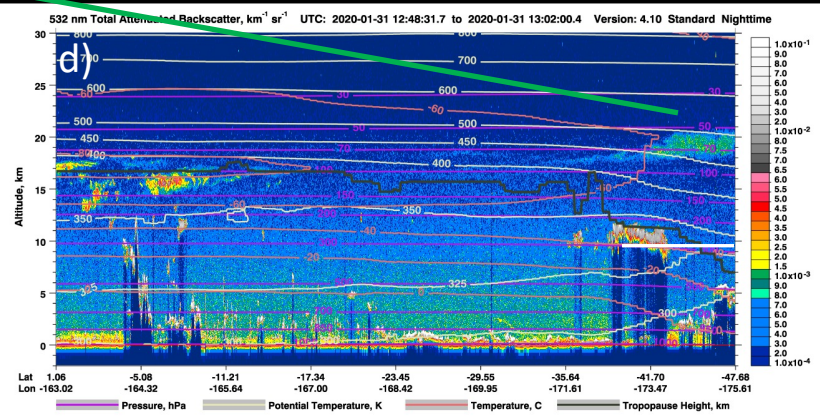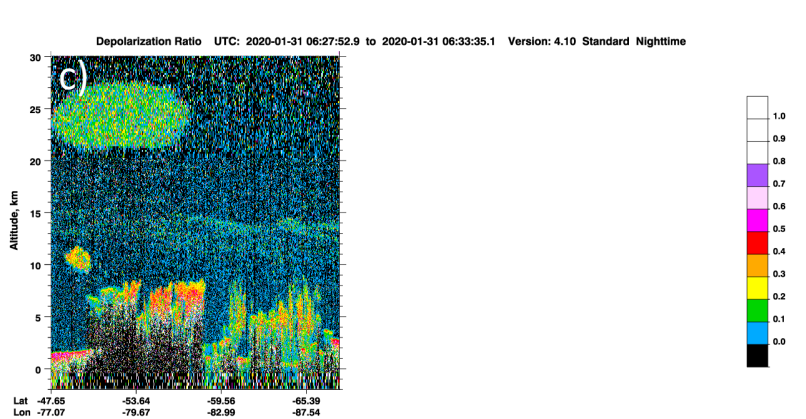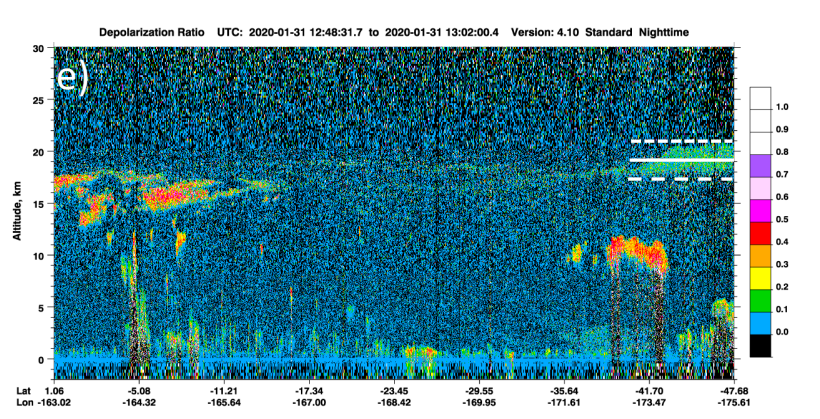

Figure S40. For figure description, see Text S1.

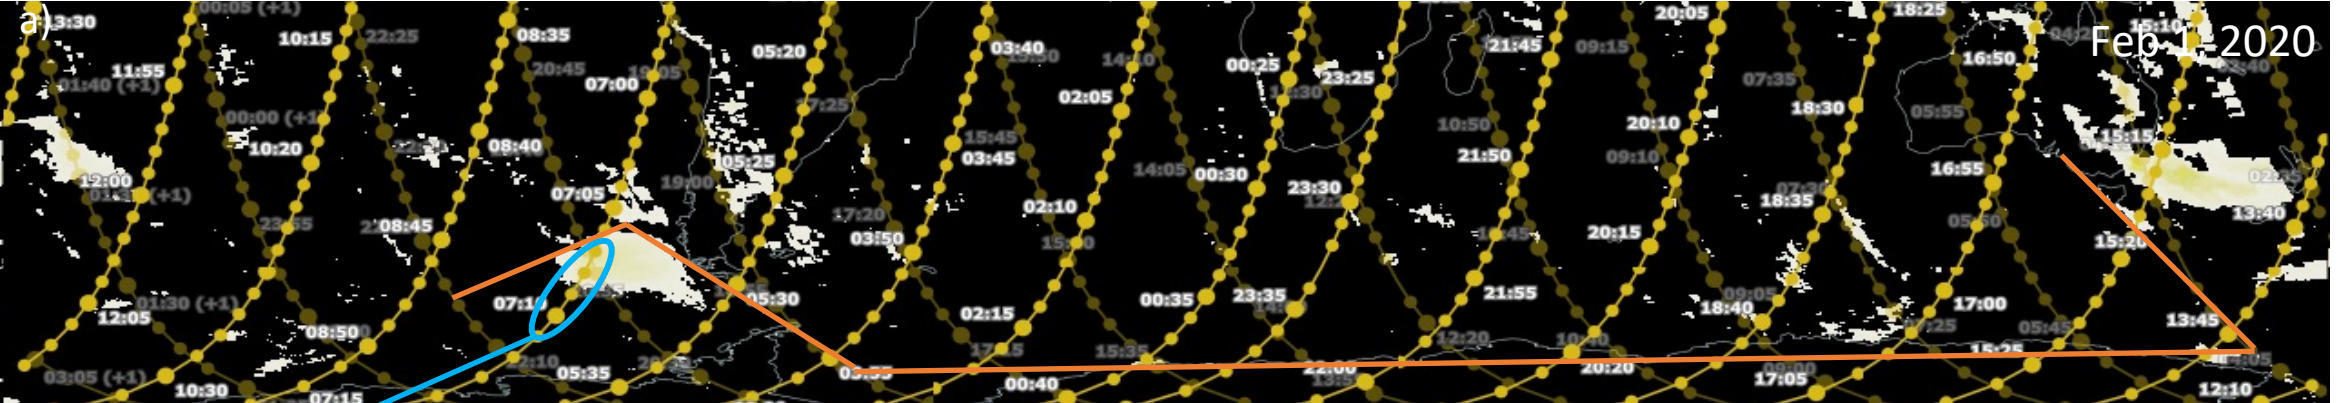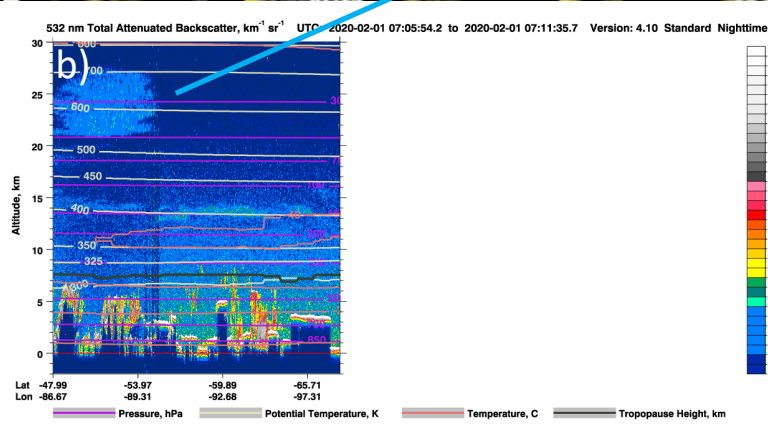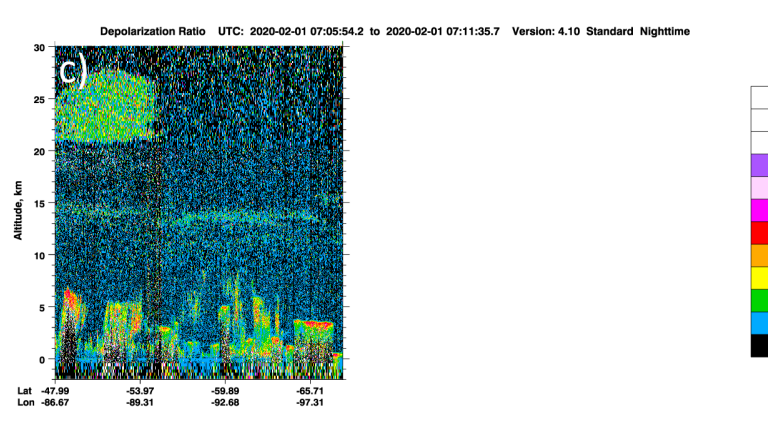

Figure S41. For figure description, see Text S1.

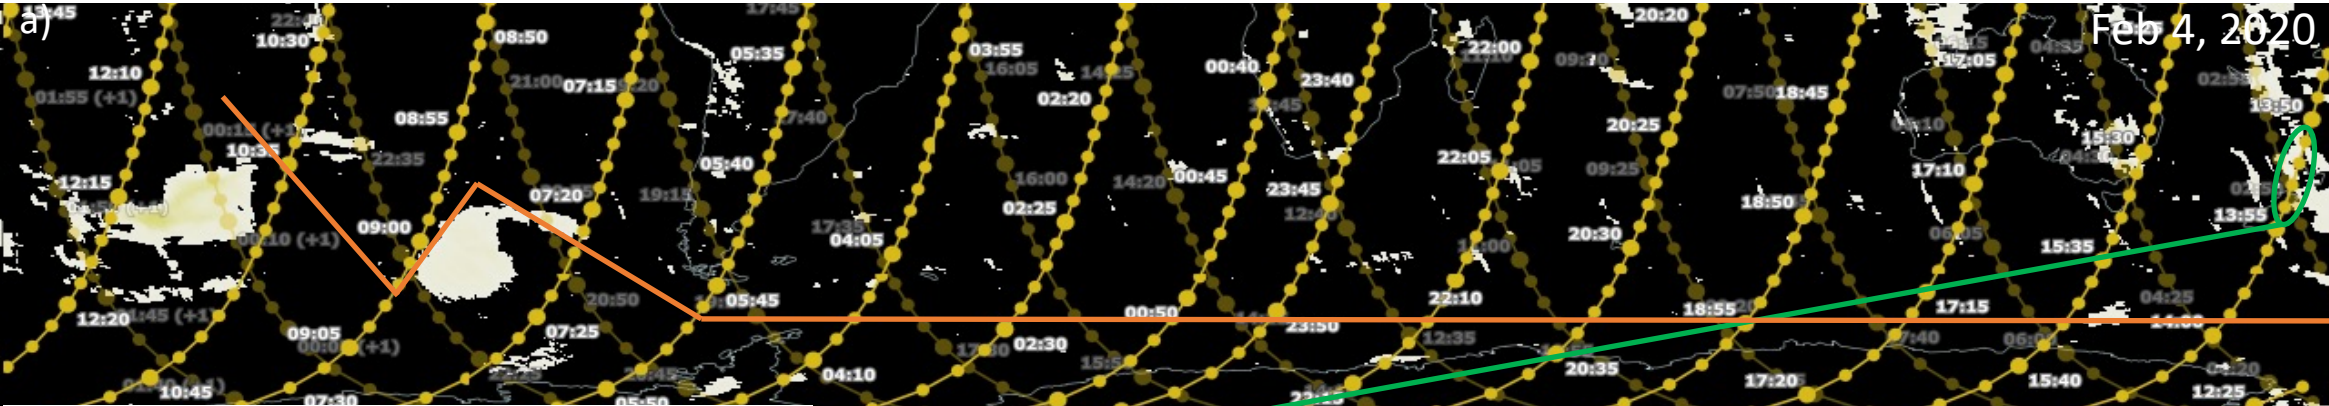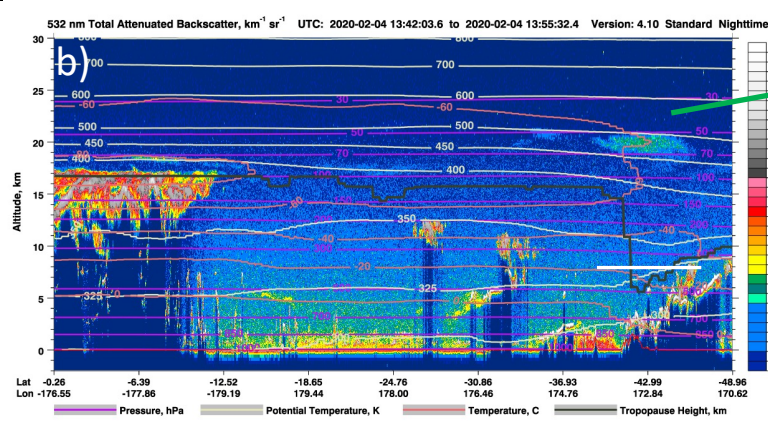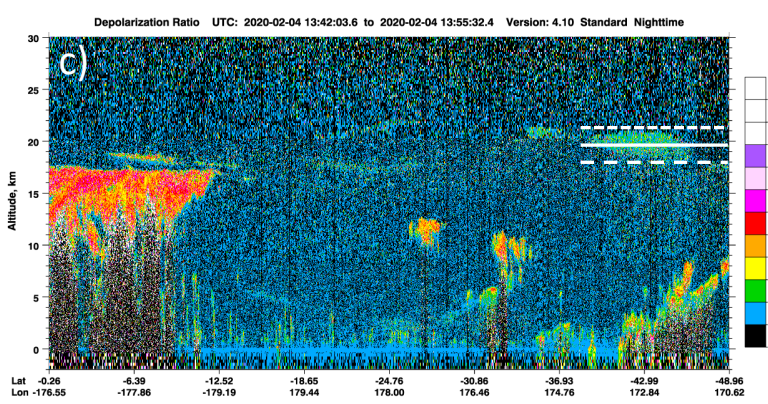

Figure S42. For figure description, see Text S1.
